# Supplementary material
Source: publisher figshare collection journal article supplement (https://gsajournals.figshare.com/ndownloader/files/29131179)
Supplement: Supplementary file 1 [file 29131179]

## Sheet: Table S3A
Table S3A. Overview of the genomic regions significantly enriched in candidate SNPs of selection
#selected	number of genomic regions significantly enriched in candidate SNPs of selection
Size(Mb)	total size of the selected regions (note that the size of regions corresponding to a single SNP was set = 0)
All	number of times a given selected region is identified in another population of the corresponding continent (average, min and max) across all the identified regions
Top 50	same numbers computed across the 50 regions with the highest combined selection scores (max CSS, see the Table AFR-ESN)
						selected regions shared with Africa							selected regions shared with Europe							selected regions shared with Asia
						All			Top 50				All			Top 50				All			Top 50
	Continent	Population	#selected	Size (MB)		mean	min-max		mean	min-max			mean	min-max		mean	min-max			mean	min-max		mean	min-max
	Africa	ESN	286	41.655		2.01399	0	4	3.44	1	4		0.171329	0	5	0.2	0	3		0.223776	0	5	0.34	0	5
	Africa	GWD	351	53.404		1.67521	0	4	3.24	0	4		0.264957	0	5	0.32	0	3		0.267806	0	5	0.48	0	5
	Africa	LWK	295	47.255		1.68814	0	4	3.34	0	4		0.169492	0	5	0.2	0	2		0.155932	0	5	0.28	0	5
	Africa	MSL	275	47.742		2.05091	0	4	3.48	0	4		0.192727	0	5	0.3	0	3		0.28	0	5	0.38	0	5
	Africa	YRI	293	46.639		2.06143	0	4	3.48	1	4		0.242321	0	5	0.38	0	5		0.249147	0	5	0.4	0	5
	Europe	CEU	322	45.06		0.201863	0	5	0.26	0	5		2.19565	0	4	3.46	0	4		0.518634	0	5	0.74	0	5
	Europe	FIN	290	40.453		0.182759	0	5	0.42	0	5		1.91034	0	4	3.08	0	4		0.47931	0	5	0.7	0	5
	Europe	GBR	338	45.098		0.177515	0	5	0.24	0	3		2.05621	0	4	3.38	0	4		0.39645	0	5	0.8	0	5
	Europe	IBS	321	46.979		0.208723	0	5	0.22	0	3		2.13396	0	4	3.48	1	4		0.436137	0	5	0.54	0	4
	Europe	TSI	331	46.56		0.226586	0	5	0.32	0	5		1.98187	0	4	3.5	0	4		0.359517	0	5	0.64	0	5
	East Asia	CDX	356	44.104		0.199438	0	5	0.48	0	5		0.404494	0	5	0.52	0	5		1.8764	0	4	3.32	0	4
	East Asia	CHB	358	42.564		0.201117	0	5	0.38	0	5		0.354749	0	5	0.44	0	5		2.06983	0	4	3.56	1	4
	East Asia	CHS	357	48.118		0.179272	0	5	0.38	0	5		0.386555	0	5	0.54	0	5		2.12605	0	4	3.58	0	4
	East Asia	JPT	338	42.177		0.213018	0	5	0.42	0	5		0.390533	0	5	0.82	0	5		1.84024	0	4	3.14	0	4
	East Asia	KHV	356	45.37		0.202247	0	5	0.32	0	5		0.457865	0	5	0.66	0	5		2.07584	0	4	3.3	0	4
	Africa	mean	300	47.339		1.89794	0	4	3.396	0.4	4		0.208165	0	5	0.28	0	3.2		0.235332	0	5	0.376	0	5
	Europe	mean	320.4	44.83		0.199489	0	5	0.292	0	4.2		2.05561	0	4	3.38	0.2	4		0.438009	0	5	0.684	0	4.8
	East Asia	mean	353	44.4666		0.199018	0	5	0.396	0	5		0.398839	0	5	0.596	0	5		1.99767	0	4	3.38	0.2	4

## Sheet: Table S3B
Table S3B. Shared selection between the YRI, CEU and CHB populations
#selected	number of genomic regions significantly enriched in candidate SNPs of selection
# in common	number of selected regions found in common with the corresponding population
% in common	% of selected regions found in common with the corresponding population
All	all the regions identified
Top 50	the 50 regions with the highest combined selection scores (max CSS, see the Table AFR-ESN)
					# in common with YRI			# in common with CEU			# in common with CHB
	Continent	Population	#selected		All	Top 50		All	Top 50		All	Top 50
	Africa	YRI	293		-	-		16	4		13	4
	Europe	CEU	322		16	4		-	-		29	8
	East Asia	CHB	358		13	4		29	8		-	-
					% in common with YRI			% in common with CEU			% in common with CHB
	Continent	Population	#selected		All	Top 50		All	Top 50		All	Top 50
	Africa	YRI	293		-	-		5.46075	8		4.43686	8
	Europe	CEU	322		5.46075	8		-	-		9.00621	16
	East Asia	CHB	358		9.00621	16		4.43686	8		-	-

## Sheet: Table S3C
Table S3C. ABC estimations of X compared to the numbers of genomic regions significantly enriched in candidate SNPs of selection
#selected	number of genomic regions significantly enriched in candidate SNPs of selection
Size(Mb)	total size of the selected regions (note that the size of regions corresponding to a single SNP was set = 0)
X	ABC estimates of X obtained with the ORs averaged across chromosomes (Table 1)
%	X as a percentage of the number of selected regions
						Incomplete sweeps										Sweeps
							95%CI					95%CI					95%CI					95%CI
	Continent	Population	#selected	Size (MB)		X	lower	-	upper		%	lower	-	upper		X	lower	-	upper		%	lower	-	upper
	Africa	ESN	286	41.655		59	34	-	85		20.6	11.9	-	29.7		56	37	-	77		19.5804	12.9371	-	26.9231
	Africa	GWD	351	53.404		67	40	-	96		19.1	11.4	-	27.4		75	52	-	100		21.3675	14.8148	-	28.49
	Africa	LWK	295	47.255		67	39	-	97		22.7	13.2	-	32.9		79	55	-	104		26.7797	18.6441	-	35.2542
	Africa	MSL	275	47.742		54	31	-	80		19.6	11.3	-	29.1		57	37	-	78		20.7273	13.4545	-	28.3636
	Africa	YRI	293	46.639		65	37	-	96		22.2	12.6	-	32.8		71	49	-	94		24.2321	16.7235	-	32.0819
	Europe	CEU	322	45.06		82	44	-	123		25.5	13.7	-	38.2		94	48	-	139		29.1925	14.9068	-	43.1677
	Europe	FIN	290	40.453		58	24	-	95		20	8.3	-	32.8		99	53	-	145		34.1379	18.2759	-	50
	Europe	GBR	338	45.098		76	39	-	116		22.5	11.5	-	34.3		126	78	-	169		37.2781	23.0769	-	50
	Europe	IBS	321	46.979		73	36	-	117		22.7	11.2	-	36.4		133	87	-	179		41.433	27.1028	-	55.7632
	Europe	TSI	331	46.56		68	33	-	104		20.5	10	-	31.4		121	74	-	166		36.5559	22.3565	-	50.1511
	East Asia	CDX	356	44.104		60	23	-	102		16.9	6.5	-	28.7		132	86	-	180		37.0787	24.1573	-	50.5618
	East Asia	CHB	358	42.564		102	66	-	139		28.5	18.4	-	38.8		174	130	-	220		48.6034	36.3128	-	61.4525
	East Asia	CHS	357	48.118		105	63	-	148		29.4	17.6	-	41.5		198	150	-	240		55.4622	42.0168	-	67.2269
	East Asia	JPT	338	42.177		78	42	-	115		23.1	12.4	-	34		152	105	-	197		44.9704	31.0651	-	58.284
	East Asia	KHV	356	45.37		93	58	-	130		26.1	16.3	-	36.5		171	125	-	218		48.0337	35.1124	-	61.236
	Africa	mean	300	47.339		62.4	36.2	-	90.8		20.8	12.1	-	30.3		67.6	46	-	90.6		22.5	15.3	-	30.2
	Europe	mean	320.4	44.83		71.4	35.2	-	111		22.3	11	-	34.6		114.6	68	-	159.6		35.8	21.2	-	49.8
	East Asia	mean	353	44.4666		87.6	50.4	-	126.8		24.8	14.3	-	35.9		165.4	119.2	-	211		46.9	33.8	-	59.8

## Sheet: AFR-ESN
Genomic regions significantly enriched in candidate SNPs of selection
The PLEK2 region highlighted in main text. The eQTLs regulating PLEK2 being located on the left side of the gene, the selection signal present in all European populations does not necessarily encompass PLEK2
max CSS	the regions are ranked by the highest combined selection scores found in the region, denoted by 'max CSS'
wth_sharing:	number of populations belonging to the same continent sharing the selection signal with the population
btw_sharing:	number of populations belonging to different continents sharing the selection signal with the population
CONT_sharing	number of populations, excluding the current one, belonging to the continent labelled CONT and sharing the selection signal, CONT=AFR, EUR or ASI
	wth_sharing=CONT_sharing when the current popualtion belongs to he continent CONT
Share_POP	1=selection signal shared with the population labelled 'POP', 0 otherwise
Chrsme	Block	Begin	End	Size (Kb)	max CSS	Genes	wth_sharing	btw_sharing	AFR_sharing	EUR_sharing	ASI_sharing	Share_ESN	Share_GWD	Share_LWK	Share_MSL	Share_YRI	Share_CEU	Share_FIN	Share_GBR	Share_IBS	Share_TSI	Share_CDX	Share_CHB	Share_CHS	Share_JPT	Share_KHV
7	6	68997	69887.6	890.672	41.0294	RN7SL371P;RP5-942I16.1;AUTS2;	4	1	4	1	0	0	1	1	1	1	0	0	0	1	0	0	0	0	0	0
4	7	53498.7	53620.6	121.97	35.3325	USP46;USP46-AS1;RP11-177B4.2;DANCR;ERVMER34-1;	4	0	4	0	0	0	1	1	1	1	0	0	0	0	0	0	0	0	0	0
12	10	79335.9	80064.9	729.041	33.5339	SYT1;RP1-78O14.1;RP11-359M6.2;RP11-359M6.1;NOP56P3;PAWR;	4	0	4	0	0	0	1	1	1	1	0	0	0	0	0	0	0	0	0	0
3	3	50391.5	50825.3	433.835	33.5	CACNA2D2;HEMK1;CISH;MAPKAPK3;RP11-804H8.6;DOCK3;	4	0	4	0	0	0	1	1	1	1	0	0	0	0	0	0	0	0	0	0
9	9	116213	116328	114.585	32.1762	RGS3;	3	0	3	0	0	0	0	1	1	1	0	0	0	0	0	0	0	0	0	0
4	14	107755	107790	35.093	31.9497	ACTR6P1;	4	0	4	0	0	0	1	1	1	1	0	0	0	0	0	0	0	0	0	0
13	6	57454.9	58252	797.06	31.8421	RN7SKP6;PRR20A;PRR20FP;MTCO2P3;SLC25A5P4;RPL31P53;PCDH17;	4	1	4	0	1	0	1	1	1	1	0	0	0	0	0	0	1	0	0	0
19	3	38090	39196.3	1106.33	31.6169	ZNF781;ZNF607;CTD-2554C21.2;AC016582.2;WDR87;SIPA1L3;PPP1R14A;SPINT2;CTB-102L5.4;C19orf33;YIF1B;KCNK6;CATSPERG;PSMD8;GGN;SPRED3;FAM98C;RASGRP4;RYR1;MAP4K1;EIF3K;ACTN4;	4	5	4	0	5	0	1	1	1	1	0	0	0	0	0	1	1	1	1	1
10	13	104595	105002	406.377	30.3761	CYP17A1;PFN1P11;BORCS7;AS3MT;RP11-724N1.1;CNNM2;NT5C2;ST13P13;RPEL1;	4	0	4	0	0	0	1	1	1	1	0	0	0	0	0	0	0	0	0	0
21	1	30706.5	30823.3	116.813	29.9084	BACH1;BACH1-IT1;BACH1-IT2;	3	0	3	0	0	0	1	1	0	1	0	0	0	0	0	0	0	0	0	0
13	1	48580	48740.2	160.125	29.5288	SUCLA2;NUDT15;MED4;POLR2KP2;	4	0	4	0	0	0	1	1	1	1	0	0	0	0	0	0	0	0	0	0
4	3	19434.8	19686.2	251.419	29.1762	RP11-3J1.1;RP11-608O21.1;	4	0	4	0	0	0	1	1	1	1	0	0	0	0	0	0	0	0	0	0
4	6	52845.9	52900.5	54.636	29.0267	RP11-61F5.1;LRRC66;SGCB;	4	0	4	0	0	0	1	1	1	1	0	0	0	0	0	0	0	0	0	0
9	3	74472.9	74591.4	118.52	28.966	ABHD17B;C9orf85;	4	0	4	0	0	0	1	1	1	1	0	0	0	0	0	0	0	0	0	0
6	0	30997.8	32605.2	1607.39	28.8606	MUC22;HCG22;RNU6-1133P;C6orf15;PSORS1C1;CDSN;POU5F1;PSORS1C3;OSBP2;XXbac-BPG299F13.17;HCG27;XXbac-BPG299F13.15;XXbac-BPG299F13.16;HLA-C;RPL3P2;USP8P1;WASF5P;XXbac-BPG248L24.13;XXbac-BPG248L24.10;HLA-B;DDX39B;ATP6V1G2;NFKBIL1;LTA;TNF;LTB;LST1;NCR3;AIF1;PRRC2A;BAG6;APOM;C6orf47;GPANK1;XXbac-BPG32J3.22;CSNK2B;LY6G5B;LY6G5C;XXbac-BPG32J3.20;ABHD16A;XXbac-BPG32J3.19;C6orf25;CLIC1;MSH5;SAPCD1;VWA7;VARS…	4	5	4	2	3	0	1	1	1	1	1	1	0	0	0	1	0	1	1	0
12	14	87468.7	87568.3	99.646	28.4154	RPL23AP68;	4	0	4	0	0	0	1	1	1	1	0	0	0	0	0	0	0	0	0	0
16	2	22935.9	23189.9	254.06	28.1083	RP11-20G6.2;USP31;SCNN1G;	4	0	4	0	0	0	1	1	1	1	0	0	0	0	0	0	0	0	0	0
6	11	111696	111863	166.938	27.7976	REV3L;TRAF3IP2-AS1;RP3-415N12.1;	3	0	3	0	0	0	1	1	1	0	0	0	0	0	0	0	0	0	0	0
8	23	121992	122110	118.742	27.6749	RP11-369K17.1;	4	0	4	0	0	0	1	1	1	1	0	0	0	0	0	0	0	0	0	0
13	3	54736.3	54785	48.709	27.4233		3	0	3	0	0	0	1	1	1	0	0	0	0	0	0	0	0	0	0	0
2	18	207141	207286	145.003	27.1946	ZDBF2;AC017081.2;HNRNPA1P51;	4	0	4	0	0	0	1	1	1	1	0	0	0	0	0	0	0	0	0	0
1	14	160949	161164	215.584	26.8935	F11R;RP11-544M22.13;TSTD1;USF1;ARHGAP30;NECTIN4;KLHDC9;PFDN2;DEDD;ACA64;UFC1;PPOX;B4GALT3;ADAMTS4;	4	0	4	0	0	0	1	1	1	1	0	0	0	0	0	0	0	0	0	0
15	0	44654	44899.6	245.524	26.7328	CASC4;CTDSPL2;EIF3J;SPG11;	4	0	4	0	0	0	1	1	1	1	0	0	0	0	0	0	0	0	0	0
4	0	131.548	302.934	171.386	26.622	ZNF718;RP11-1365D11.1;ZNF876P;RP11-478C6.6;ZNF732;	4	0	4	0	0	0	1	1	1	1	0	0	0	0	0	0	0	0	0	0
1	10	114086	114282	196.564	26.5932	MAGI3;PHTF1;	4	0	4	0	0	0	1	1	1	1	0	0	0	0	0	0	0	0	0	0
1	9	101304	101476	172.89	26.593	EXTL2;SLC30A7;DPH5;	4	0	4	0	0	0	1	1	1	1	0	0	0	0	0	0	0	0	0	0
19	0	10710.4	11018.4	307.991	26.4123	CTC-539A10.7;SLC44A2;ILF3;DNM2;TMED1;AC007229.3;C19orf38;CARM1;	4	0	4	0	0	0	1	1	1	1	0	0	0	0	0	0	0	0	0	0
22	3	35999.9	36696.7	696.777	26.3918	MB;CITF22-62D4.1;APOL6;RBFOX2;APOL3;MTCO1P20;MTCO2P20;MTCO3P20;MTND1P10;MTATP6P20;Z95114.7;APOL4;APOL1;MYH9;	4	0	4	0	0	0	1	1	1	1	0	0	0	0	0	0	0	0	0	0
5	7	87853	87969.9	116.881	26.3253	LINC00461;CTC-470C15.1;	4	0	4	0	0	0	1	1	1	1	0	0	0	0	0	0	0	0	0	0
2	11	155796	155950	154.165	26.3097	CBX3P6;AC092625.1;RNU6-1001P;	4	3	4	3	0	0	1	1	1	1	1	0	0	1	1	0	0	0	0	0
7	13	132623	132748	125.241	26.2378	CHCHD3;	2	2	2	2	0	0	0	0	1	1	1	0	1	0	0	0	0	0	0	0
12	11	82057.7	82158.1	100.415	25.9004	PPFIA2;	4	0	4	0	0	0	1	1	1	1	0	0	0	0	0	0	0	0	0	0
13	7	68402.1	68488.8	86.638	25.773	NPM1P22;OR7E111P;OR7E33P;	2	1	2	1	0	0	0	0	1	1	0	1	0	0	0	0	0	0	0	0
1	21	223277	223373	95.964	25.6508	TLR5;RP11-239E10.2;RP11-239E10.3;	4	0	4	0	0	0	1	1	1	1	0	0	0	0	0	0	0	0	0	0
4	16	123022	123339	317.455	25.6148	KIAA1109;ADAD1;	1	0	1	0	0	0	0	0	0	1	0	0	0	0	0	0	0	0	0	0
16	0	14600.8	14777.8	176.995	25.5207	PARN;BFAR;PLA2G10;	4	0	4	0	0	0	1	1	1	1	0	0	0	0	0	0	0	0	0	0
15	2	76664	77832.3	1168.28	25.3867	SCAPER;PEAK1;HMG20A;RP11-307C19.1;	4	0	4	0	0	0	1	1	1	1	0	0	0	0	0	0	0	0	0	0
8	6	49108	49186	77.967	25.35	RP11-769N21.2;	3	0	3	0	0	0	1	1	0	1	0	0	0	0	0	0	0	0	0	0
13	0	41897.8	42492.2	594.405	25.157	NAA16;TUBBP2;VWA8;	3	1	3	0	1	0	1	0	1	1	0	0	0	0	0	1	0	0	0	0
12	9	76773.1	76985.1	211.996	25.111	OSBPL8;RP11-20E24.1;	4	0	4	0	0	0	1	1	1	1	0	0	0	0	0	0	0	0	0	0
8	10	63596.3	63729.7	133.488	24.844	NKAIN3;	1	1	1	1	0	0	0	0	0	1	0	0	0	0	1	0	0	0	0	0
11	7	59295.6	59449.3	153.644	24.6415	OR4D7P;AP000442.4;OSBP;AP000442.1;PATL1;AP000640.2;	3	0	3	0	0	0	1	0	1	1	0	0	0	0	0	0	0	0	0	0
14	10	81146.6	81536.8	390.188	24.5299	CEP128;TSHR;	4	2	4	0	2	0	1	1	1	1	0	0	0	0	0	0	1	0	1	0
4	12	99933	100201	267.485	24.4883	METAP1;ADH6;RP11-696N14.1;ADH1A;	1	5	1	0	5	0	0	0	0	1	0	0	0	0	0	1	1	1	1	1
22	4	38230.6	38347.3	116.651	24.3197	ANKRD54;EIF3L;MICALL1;C22orf23;	2	0	2	0	0	0	0	1	1	0	0	0	0	0	0	0	0	0	0	0
10	8	91314.7	91423.6	108.879	24.2571	SLC16A12;PANK1;RP11-80H5.6;RP11-80H5.9;	4	0	4	0	0	0	1	1	1	1	0	0	0	0	0	0	0	0	0	0
22	1	31065.1	31380.2	315.177	24.1897	DUSP18;OSBP2;MORC2;TUG1;RP3-430N8.11;	1	0	1	0	0	0	0	0	0	1	0	0	0	0	0	0	0	0	0	0
20	3	37352.1	37447	94.873	24.0779	SLC32A1;ACTR5;PPP1R16B;	3	0	3	0	0	0	1	0	1	1	0	0	0	0	0	0	0	0	0	0
2	6	98833.4	99159.8	326.343	23.959	VWA3B;AC092675.3;CNGA3;INPP4A;	3	0	3	0	0	0	1	0	1	1	0	0	0	0	0	0	0	0	0	0
2	17	201043	201248	204.864	23.9406	SPATS2L;	3	0	3	0	0	0	1	0	1	1	0	0	0	0	0	0	0	0	0	0
7	14	156468	156573	105.038	23.9271	RNF32;LMBR1;	1	0	1	0	0	0	1	0	0	0	0	0	0	0	0	0	0	0	0	0
2	16	194598	195057	459.323	23.7047	AC068135.1;GLULP6;HNRNPA1P47;	4	0	4	0	0	0	1	1	1	1	0	0	0	0	0	0	0	0	0	0
14	8	60920.7	61231.5	310.77	23.5284	C14orf39;SALL4P7;SIX6;RP11-1042B17.3;RP11-1042B17.1;RP11-1042B17.2;SALRNA1;SIX1;SIX4;MNAT1;	4	0	4	0	0	0	1	1	1	1	0	0	0	0	0	0	0	0	0	0
8	3	38682.5	38761.8	79.274	23.4511	TACC1;PLEKHA2;	3	0	3	0	0	0	1	1	0	1	0	0	0	0	0	0	0	0	0	0
9	10	119933	120043	110.966	23.2864	ASTN2;	0	0	0	0	0	0	0	0	0	0	0	0	0	0	0	0	0	0	0	0
5	4	72279.6	72395.9	116.278	23.1726	FCHO2;	4	0	4	0	0	0	1	1	1	1	0	0	0	0	0	0	0	0	0	0
1	22	225695	225750	54.981	23.0593	ENAH;	4	0	4	0	0	0	1	1	1	1	0	0	0	0	0	0	0	0	0	0
5	1	28783.9	28812.7	28.823	22.8835	CTD-2134P3.1;	1	0	1	0	0	0	0	1	0	0	0	0	0	0	0	0	0	0	0	0
4	25	177334	177483	148.202	22.8424		2	0	2	0	0	0	1	0	0	1	0	0	0	0	0	0	0	0	0	0
6	8	87394.9	87748.7	353.817	22.8168	RP1-253B10.1;RP1-253B10.2;HTR1E;	4	0	4	0	0	0	1	1	1	1	0	0	0	0	0	0	0	0	0	0
1	5	83364.6	83597.3	232.748	22.8074	LINC01362;	0	0	0	0	0	0	0	0	0	0	0	0	0	0	0	0	0	0	0	0
3	5	69820.8	69939.1	118.269	22.7208	MITF;	3	0	3	0	0	0	1	1	0	1	0	0	0	0	0	0	0	0	0	0
16	1	15278	15408.4	130.398	22.7021		2	0	2	0	0	0	0	0	1	1	0	0	0	0	0	0	0	0	0	0
2	13	182118	182673	554.913	22.7008	AC104820.2;RNU6ATAC19P;	4	0	4	0	0	0	1	1	1	1	0	0	0	0	0	0	0	0	0	0
7	0	7995.44	8082.33	86.885	22.6855	AC006042.7;GLCCI1;	1	0	1	0	0	0	0	0	0	1	0	0	0	0	0	0	0	0	0	0
14	6	55629.1	55679.7	50.634	22.6448	DLGAP5;RP11-698F20.3;	4	0	4	0	0	0	1	1	1	1	0	0	0	0	0	0	0	0	0	0
2	8	114386	114425	38.964	22.6303	RABL2A;RP11-395L14.17;RP11-395L14.13;AC017074.1;	3	0	3	0	0	0	1	0	1	1	0	0	0	0	0	0	0	0	0	0
8	17	88797.5	88889.4	91.931	22.5894	SOX5P1;DCAF4L2;	1	0	1	0	0	0	0	0	0	1	0	0	0	0	0	0	0	0	0	0
5	10	163132	163202	70.352	22.5633	RP11-756G12.1;	0	0	0	0	0	0	0	0	0	0	0	0	0	0	0	0	0	0	0	0
8	14	76695.9	76702.5	6.681	22.5288		4	5	4	0	5	0	1	1	1	1	0	0	0	0	0	1	1	1	1	1
7	10	92105.4	92466.3	360.903	22.5269	AC007566.10;PEX1;RBM48;CDK6;	3	0	3	0	0	0	1	1	0	1	0	0	0	0	0	0	0	0	0	0
14	12	102100	102316	216.267	22.4762	RP11-1029J19.4;RP11-1029J19.5;RP11-796G6.1;LINC00239;PPP2R5C;	4	0	4	0	0	0	1	1	1	1	0	0	0	0	0	0	0	0	0	0
7	2	23780.6	23876.8	96.172	22.3189	STK31;	3	0	3	0	0	0	1	0	1	1	0	0	0	0	0	0	0	0	0	0
8	1	27088.4	27186	97.637	22.3101	STMN4;TRIM35;PTK2B;	1	0	1	0	0	0	0	0	0	1	0	0	0	0	0	0	0	0	0	0
7	5	45606	45665.3	59.3	22.2873	ADCY1;	3	0	3	0	0	0	1	1	0	1	0	0	0	0	0	0	0	0	0	0
6	7	83697.9	84020.3	322.394	22.2658	UBE3D;DOPEY1;ME1;	4	5	4	0	5	0	1	1	1	1	0	0	0	0	0	1	1	1	1	1
1	3	63858.3	63986.6	128.272	22.2425	ALG6;ITGB3BP;	2	0	2	0	0	0	0	1	0	1	0	0	0	0	0	0	0	0	0	0
12	3	26981.1	27456.1	474.964	22.2118	ITPR2;MED21;C12orf71;RP11-582E3.5;RP11-582E3.2;RP11-582E3.4;STK38L;	4	0	4	0	0	0	1	1	1	1	0	0	0	0	0	0	0	0	0	0
20	2	34399.7	34549.9	150.296	22.0785	PHF20;LL22NC03-86D4.1;SCAND1;	4	10	4	5	5	0	1	1	1	1	1	1	1	1	1	1	1	1	1	1
2	12	170761	170910	148.592	22.0409	UBR3;	0	0	0	0	0	0	0	0	0	0	0	0	0	0	0	0	0	0	0	0
6	2	70574.9	70648.5	73.615	22.0302	COL19A1;	3	0	3	0	0	0	1	1	0	1	0	0	0	0	0	0	0	0	0	0
8	0	8990.58	9766.83	776.249	22.0176	PPP1R3B;RP11-10A14.4;TNKS;LINC00599;	1	2	1	2	0	0	0	1	0	0	1	0	0	0	1	0	0	0	0	0
8	2	37532.4	38152.6	620.181	22.0016	RP11-346L1.2;ZNF703;RP11-863K10.2;BAG4;DDHD2;PLPP5;WHSC1L1;	4	0	4	0	0	0	1	1	1	1	0	0	0	0	0	0	0	0	0	0
10	11	102215	102324	109.62	21.9237	WNT8B;SEC31B;NDUFB8;HIF1AN;	2	0	2	0	0	0	0	0	1	1	0	0	0	0	0	0	0	0	0	0
12	4	29319.5	29512.9	193.402	21.843	FAR2;ERGIC2;	2	2	2	0	2	0	1	0	1	0	0	0	0	0	0	0	0	0	1	1
7	7	74002.1	74140.9	138.842	21.8274	GTF2IRD1;RP5-1186P10.2;	3	5	3	0	5	0	1	0	1	1	0	0	0	0	0	1	1	1	1	1
9	7	100570	100748	178.066	21.7953	PTCSC2;FOXE1;TRMO;HEMGN;ANP32B;	4	0	4	0	0	0	1	1	1	1	0	0	0	0	0	0	0	0	0	0
2	15	193151	193806	654.926	21.7648	PCGEM1;	4	0	4	0	0	0	1	1	1	1	0	0	0	0	0	0	0	0	0	0
16	7	69612.2	69901.1	288.939	21.7443	NFAT5;WWP2;	3	0	3	0	0	0	0	1	1	1	0	0	0	0	0	0	0	0	0	0
6	4	72762.4	72855.8	93.45	21.693	RIMS1;	3	0	3	0	0	0	1	1	0	1	0	0	0	0	0	0	0	0	0	0
16	4	48316.9	48386	69.007	21.5695	LONP2;	4	0	4	0	0	0	1	1	1	1	0	0	0	0	0	0	0	0	0	0
1	18	192902	193001	99.059	21.4659	LINC01032;ZNF101P2;UCHL5;	0	0	0	0	0	0	0	0	0	0	0	0	0	0	0	0	0	0	0	0
2	7	102981	103029	47.678	21.1837	IL18R1;SDR42E1P5;	1	2	1	1	1	0	0	0	0	1	1	0	0	0	0	0	1	0	0	0
12	12	82912.6	83112.6	200.032	21.1656	RP11-263K4.3;TMTC2;	4	0	4	0	0	0	1	1	1	1	0	0	0	0	0	0	0	0	0	0
11	8	61077.6	61222	144.326	21.1222	DDB1;TKFC;CYB561A3;TMEM138;TMEM216;CPSF7;SDHAF2;RP11-286N22.8;	2	0	2	0	0	0	1	0	1	0	0	0	0	0	0	0	0	0	0	0
3	8	89901.4	89938.6	37.211	21.1161		3	0	3	0	0	0	1	0	1	1	0	0	0	0	0	0	0	0	0	0
1	2	51615.9	51671.1	55.192	20.9146	C1orf185;CFL1P2;LINC01562;	3	0	3	0	0	0	1	1	1	0	0	0	0	0	0	0	0	0	0	0
13	8	76228.7	76377.1	148.46	20.8871	RP11-29G8.3;LMO7;	4	0	4	0	0	0	1	1	1	1	0	0	0	0	0	0	0	0	0	0
18	2	37182.9	37364.7	181.745	20.8346	RP11-244M2.1;	0	0	0	0	0	0	0	0	0	0	0	0	0	0	0	0	0	0	0	0
12	6	46633.3	47070.7	437.377	20.8171	SLC38A1;RP11-446N19.1;OR7A19P;	3	0	3	0	0	0	1	0	1	1	0	0	0	0	0	0	0	0	0	0
6	13	122750	122836	86.512	20.7712	HSF2;SERINC1;PKIB;	3	0	3	0	0	0	1	0	1	1	0	0	0	0	0	0	0	0	0	0
5	6	86528.6	86979.5	450.89	20.6738	CTC-242N15.1;CTD-2316B1.1;	4	0	4	0	0	0	1	1	1	1	0	0	0	0	0	0	0	0	0	0
4	17	129976	130026	49.904	20.6457	SCLT1;C4orf33;	4	0	4	0	0	0	1	1	1	1	0	0	0	0	0	0	0	0	0	0
3	12	118453	118502	49.504	20.6242		1	0	1	0	0	0	0	0	0	1	0	0	0	0	0	0	0	0	0	0
16	8	72074.2	72630.4	556.175	20.5842	TXNL4B;HP;HPR;DHX38;PMFBP1;RP11-328J14.1;LINC01572;AC004158.3;	4	0	4	0	0	0	1	1	1	1	0	0	0	0	0	0	0	0	0	0
18	0	7988.64	8078.55	89.91	20.5319	PTPRM;	3	0	3	0	0	0	0	1	1	1	0	0	0	0	0	0	0	0	0	0
11	15	114480	114562	81.26	20.5145	NXPE2;	1	0	1	0	0	0	0	0	0	1	0	0	0	0	0	0	0	0	0	0
20	1	33334.7	33341.7	7.027	20.431	NCOA6;	1	0	1	0	0	0	1	0	0	0	0	0	0	0	0	0	0	0	0	0
1	20	202587	202666	78.953	20.3772	SYT2;	2	0	2	0	0	0	0	1	1	0	0	0	0	0	0	0	0	0	0	0
8	22	114454	115059	605.185	20.366	Y_RNA;	4	2	4	2	0	0	1	1	1	1	1	0	1	0	0	0	0	0	0	0
5	2	43604.3	43889.2	284.949	20.2152	NNT;RP11-8L21.1;	4	4	4	2	2	0	1	1	1	1	0	1	0	1	0	1	0	1	0	0
2	2	85187.2	85256.4	69.279	20.169	KCMF1;	1	0	1	0	0	0	0	0	0	1	0	0	0	0	0	0	0	0	0	0
14	4	39451.5	39505	53.511	20.1471	Y_RNA;SEC23A;	0	4	0	4	0	0	0	0	0	0	1	1	1	1	0	0	0	0	0	0
6	6	82286.6	82393.5	106.912	20.1318	FAM46A;RNA5SP210;	2	0	2	0	0	0	0	0	1	1	0	0	0	0	0	0	0	0	0	0
9	12	128051	128299	248.697	20.1151	GAPVD1;MAPKAP1;	2	0	2	0	0	0	0	0	1	1	0	0	0	0	0	0	0	0	0	0
3	7	88558.9	88559.1	0.221	20.0915		0	0	0	0	0	0	0	0	0	0	0	0	0	0	0	0	0	0	0	0
10	2	28873.2	28922.8	49.606	20.0666	WAC;	0	0	0	0	0	0	0	0	0	0	0	0	0	0	0	0	0	0	0	0
8	4	41298.6	41370.4	71.833	20.048	RP11-15G16.1;GOLGA7;	1	0	1	0	0	0	0	0	0	1	0	0	0	0	0	0	0	0	0	0
5	5	84291.4	84300.8	9.446	20.0258	RP11-509M23.1;	0	0	0	0	0	0	0	0	0	0	0	0	0	0	0	0	0	0	0	0
12	17	122999	123125	125.961	19.9942	RSRC2;KNTC1;HCAR1;	0	0	0	0	0	0	0	0	0	0	0	0	0	0	0	0	0	0	0	0
18	5	49527.6	49609.1	81.477	19.9893		3	0	3	0	0	0	1	0	1	1	0	0	0	0	0	0	0	0	0	0
8	20	100217	100747	530.605	19.9114	VPS13B;	3	0	3	0	0	0	1	0	1	1	0	0	0	0	0	0	0	0	0	0
8	15	80428.7	80650.4	221.718	19.9102	RP11-758H6.1;RPL3P9;STMN2;	3	0	3	0	0	0	1	0	1	1	0	0	0	0	0	0	0	0	0	0
14	7	57695	57887	192.033	19.9075	EXOC5;AP5M1;RP11-932A10.1;NAA30;	0	0	0	0	0	0	0	0	0	0	0	0	0	0	0	0	0	0	0	0
16	3	28174	28231.9	57.845	19.8909	XPO6;	1	0	1	0	0	0	0	1	0	0	0	0	0	0	0	0	0	0	0	0
1	17	191911	192124	213.003	19.814	RP11-541F9.2;RGS18;	1	0	1	0	0	0	1	0	0	0	0	0	0	0	0	0	0	0	0	0
7	11	117952	117952	0	19.811		0	0	0	0	0	0	0	0	0	0	0	0	0	0	0	0	0	0	0	0
3	6	87171.3	87998.9	827.646	19.7935	MIR4795;CHMP2B;RP11-451B8.1;RNU6ATAC6P;	1	0	1	0	0	0	0	0	0	1	0	0	0	0	0	0	0	0	0	0
3	13	120030	120313	283.76	19.7632	RP11-174O3.1;LRRC58;RP11-174O3.3;RP11-174O3.4;NDUFB4;	4	0	4	0	0	0	1	1	1	1	0	0	0	0	0	0	0	0	0	0
4	10	87621.5	87714.6	93.126	19.7415	PTPN13;	3	0	3	0	0	0	1	1	0	1	0	0	0	0	0	0	0	0	0	0
10	3	38334.3	38435.6	101.301	19.7358	ZNF33A;EIF3LP3;FXYD6P2;ZNF37A;RP11-508N22.12;	2	0	2	0	0	0	0	1	0	1	0	0	0	0	0	0	0	0	0	0
8	7	50155.6	50213.9	58.392	19.7045		3	0	3	0	0	0	1	1	0	1	0	0	0	0	0	0	0	0	0	0
18	6	51735	51846	111.008	19.7014	MBD2;POLI;STARD6;	0	0	0	0	0	0	0	0	0	0	0	0	0	0	0	0	0	0	0	0
6	10	109355	109514	158.994	19.6587	SESN1;CEP57L1;	0	0	0	0	0	0	0	0	0	0	0	0	0	0	0	0	0	0	0	0
8	13	72475.7	72508.6	32.809	19.5779	RP11-1102P16.1;	3	0	3	0	0	0	1	1	1	0	0	0	0	0	0	0	0	0	0	0
10	7	86093.1	86278.5	185.378	19.5775	CCSER2;	2	0	2	0	0	0	0	0	1	1	0	0	0	0	0	0	0	0	0	0
4	2	13332.6	13419.7	87.154	19.5669	HSP90AB2P;RAB28;	4	0	4	0	0	0	1	1	1	1	0	0	0	0	0	0	0	0	0	0
13	2	52677.5	53033.7	356.171	19.5606	NEK5;NEK3;THSD1;VPS36;CKAP2;	4	0	4	0	0	0	1	1	1	1	0	0	0	0	0	0	0	0	0	0
1	23	228043	228128	84.955	19.5542	WNT9A;	0	0	0	0	0	0	0	0	0	0	0	0	0	0	0	0	0	0	0	0
13	5	56684.4	56688.9	4.556	19.5508		0	0	0	0	0	0	0	0	0	0	0	0	0	0	0	0	0	0	0	0
8	5	47757.4	47768.1	10.694	19.5507	LINC00293;	0	0	0	0	0	0	0	0	0	0	0	0	0	0	0	0	0	0	0	0
1	15	161747	161792	45.429	19.5209	ATF6;	2	0	2	0	0	0	1	0	0	1	0	0	0	0	0	0	0	0	0	0
9	6	95062.7	95378.4	315.702	19.4826	NOL8;CENPP;	3	0	3	0	0	0	1	1	1	0	0	0	0	0	0	0	0	0	0	0
10	5	62379.5	62459.8	80.324	19.4647	ANK3;ARL4AP1;	0	0	0	0	0	0	0	0	0	0	0	0	0	0	0	0	0	0	0	0
4	9	73937.5	74466.4	528.876	19.4014	ANKRD17;AFM;RP11-622A1.2;RP11-622A1.1;RASSF6;	3	0	3	0	0	0	1	1	0	1	0	0	0	0	0	0	0	0	0	0
11	3	30227.9	30261.2	33.292	19.3559	FSHB;	0	0	0	0	0	0	0	0	0	0	0	0	0	0	0	0	0	0	0	0
5	0	15708.2	15857.4	149.248	19.3384	FBXL7;	2	0	2	0	0	0	1	0	1	0	0	0	0	0	0	0	0	0	0	0
7	4	44470.4	44626.5	156.094	19.3062	NUDCD3;NPC1L1;DDX56;TMED4;	2	0	2	0	0	0	1	1	0	0	0	0	0	0	0	0	0	0	0	0
8	16	83076.9	83151.5	74.598	19.2883	RP11-99H20.1;	0	0	0	0	0	0	0	0	0	0	0	0	0	0	0	0	0	0	0	0
1	0	31777.2	31827.2	49.951	19.2252	ZCCHC17;	1	2	1	2	0	0	0	0	0	1	0	0	0	1	1	0	0	0	0	0
22	0	30103.5	30391.3	287.805	19.221	CABP7;ZMAT5;UQCR10;ASCC2;MTMR3;	3	2	3	2	0	0	1	1	0	1	1	0	0	1	0	0	0	0	0	0
11	14	110644	110666	22.254	19.2026	HNRNPA1P60;	4	0	4	0	0	0	1	1	1	1	0	0	0	0	0	0	0	0	0	0
9	0	11821.7	11934.3	112.674	19.1914		2	0	2	0	0	0	0	0	1	1	0	0	0	0	0	0	0	0	0	0
2	10	144442	144499	56.557	19.1538	ARHGAP15;	4	0	4	0	0	0	1	1	1	1	0	0	0	0	0	0	0	0	0	0
22	2	34176.5	34427.8	251.364	19.1418	LARGE1;LL22NC03-86D4.1;	1	0	1	0	0	0	0	0	0	1	0	0	0	0	0	0	0	0	0	0
14	13	104452	104516	63.215	19.1135	TDRD9;	4	0	4	0	0	0	1	1	1	1	0	0	0	0	0	0	0	0	0	0
17	3	61156.1	61245.6	89.49	19.0938	TANC2;	0	4	0	0	4	0	0	0	0	0	0	0	0	0	0	1	1	1	0	1
13	4	55508.5	55637.1	128.586	19.0795		2	0	2	0	0	0	0	0	1	1	0	0	0	0	0	0	0	0	0	0
1	12	145619	145691	71.889	19.046		2	0	2	0	0	0	0	1	1	0	0	0	0	0	0	0	0	0	0	0
1	1	41117.2	41156.5	39.319	19.0417	RIMS3;RP4-739H11.3;NFYC;	2	0	2	0	0	0	0	0	1	1	0	0	0	0	0	0	0	0	0	0
13	10	87303.6	87579.5	275.902	19.0411	LINC00430;	2	0	2	0	0	0	1	0	0	1	0	0	0	0	0	0	0	0	0	0
2	1	55748.2	55856.9	108.638	19.0258	CFAP36;PNPT1;	3	2	3	2	0	0	1	0	1	1	0	0	0	1	1	0	0	0	0	0
2	14	183594	183813	219.458	18.9699	DNAJC10;NCKAP1;	0	2	0	2	0	0	0	0	0	0	0	1	1	0	0	0	0	0	0	0
11	5	47161.6	47191.2	29.591	18.9317	C11orf49;ARFGAP2;	1	1	1	0	1	0	0	0	0	1	0	0	0	0	0	1	0	0	0	0
3	14	153089	153155	65.554	18.9271	RP11-292E2.1;RP11-292E2.2;RP11-23D24.2;RP11-292E2.4;	0	0	0	0	0	0	0	0	0	0	0	0	0	0	0	0	0	0	0	0
8	9	62196.7	62290.1	93.332	18.8689	CLVS1;	1	0	1	0	0	0	0	0	0	1	0	0	0	0	0	0	0	0	0	0
4	15	110384	110422	38.07	18.8339	SEC24B;	4	0	4	0	0	0	1	1	1	1	0	0	0	0	0	0	0	0	0	0
11	13	109476	109698	222.359	18.7961	RP11-386B1.1;RP11-262A12.1;	2	0	2	0	0	0	0	1	0	1	0	0	0	0	0	0	0	0	0	0
14	5	48235.6	48276.2	40.667	18.7946	LINC00648;RP11-476J6.1;	1	0	1	0	0	0	0	0	0	1	0	0	0	0	0	0	0	0	0	0
10	9	96206.3	96309	102.622	18.7502	TBC1D12;HELLS;	1	0	1	0	0	0	0	0	1	0	0	0	0	0	0	0	0	0	0	0
18	1	24808.2	24831	22.819	18.7234	RP11-57J16.1;	0	0	0	0	0	0	0	0	0	0	0	0	0	0	0	0	0	0	0	0
19	1	22256.1	22279.3	23.207	18.7024	ZNF257;	1	0	1	0	0	0	0	1	0	0	0	0	0	0	0	0	0	0	0	0
12	13	86853.6	86893.8	40.243	18.6989	MGAT4C;	3	0	3	0	0	0	1	1	1	0	0	0	0	0	0	0	0	0	0	0
17	0	3526	3707.75	181.753	18.6745	SHPK;ITGAE;	3	0	3	0	0	0	1	0	1	1	0	0	0	0	0	0	0	0	0	0
19	4	46219.1	46265	45.884	18.6214	FBXO46;BHMG1;	0	0	0	0	0	0	0	0	0	0	0	0	0	0	0	0	0	0	0	0
3	9	102082	102101	19.263	18.6149	ZPLD1;	1	0	1	0	0	0	0	0	0	1	0	0	0	0	0	0	0	0	0	0
16	9	81474.5	81542.9	68.335	18.6131	CMIP;	0	0	0	0	0	0	0	0	0	0	0	0	0	0	0	0	0	0	0	0
10	12	103663	103736	73.382	18.593	C10orf76;	0	0	0	0	0	0	0	0	0	0	0	0	0	0	0	0	0	0	0	0
11	9	62437.6	62519.6	81.918	18.5885	UQCC3;LBHD1;UBXN1;LRRN4CL;BSCL2;HNRNPUL2;TTC9C;ZBTB3;	2	0	2	0	0	0	1	1	0	0	0	0	0	0	0	0	0	0	0	0
4	5	48546.2	48687.4	141.198	18.5691	FRYL;	3	0	3	0	0	0	1	0	1	1	0	0	0	0	0	0	0	0	0	0
2	3	87372	87393.2	21.223	18.5526	AC083899.3;	2	0	2	0	0	0	1	0	1	0	0	0	0	0	0	0	0	0	0	0
14	3	36030.5	36127.1	96.664	18.5003	RALGAPA1;	1	0	1	0	0	0	0	0	0	1	0	0	0	0	0	0	0	0	0	0
20	0	20484	20570.1	86.075	18.4854	RALGAPA2;	3	0	3	0	0	0	1	0	1	1	0	0	0	0	0	0	0	0	0	0
12	15	98417.1	98514.6	97.543	18.4832	RP11-690J15.1;	1	0	1	0	0	0	1	0	0	0	0	0	0	0	0	0	0	0	0	0
14	0	26750.9	26759.7	8.746	18.4572		1	0	1	0	0	0	0	0	0	1	0	0	0	0	0	0	0	0	0	0
19	2	34855.3	34915.5	60.168	18.4547	GPI;RP11-618P17.4;PDCD2L;	4	0	4	0	0	0	1	1	1	1	0	0	0	0	0	0	0	0	0	0
9	11	125905	125984	78.987	18.4518	STRBP;	1	0	1	0	0	0	1	0	0	0	0	0	0	0	0	0	0	0	0	0
3	11	112817	112902	84.822	18.3968	RP11-572M11.4;RP11-572M11.3;	1	0	1	0	0	0	0	0	0	1	0	0	0	0	0	0	0	0	0	0
8	18	90113.5	90119.8	6.326	18.3731		0	0	0	0	0	0	0	0	0	0	0	0	0	0	0	0	0	0	0	0
8	11	64679.6	64736.7	57.108	18.3132	RP11-32K4.1;LINC01289;	0	0	0	0	0	0	0	0	0	0	0	0	0	0	0	0	0	0	0	0
6	3	71153.7	71192.8	39.09	18.3111	FAM135A;	1	1	1	0	1	0	0	0	0	1	0	0	0	0	0	0	0	0	0	1
11	0	10066.9	10128.9	61.994	18.2826	SBF2;	4	0	4	0	0	0	1	1	1	1	0	0	0	0	0	0	0	0	0	0
1	7	93617.4	93680.7	63.385	18.2425	TMED5;CCDC18;	2	1	2	0	1	0	0	1	0	1	0	0	0	0	0	0	0	0	1	0
6	12	117955	118030	75.024	18.2312	NEPNP;NUS1;	0	0	0	0	0	0	0	0	0	0	0	0	0	0	0	0	0	0	0	0
10	0	1893.21	1916.97	23.754	18.2205		0	0	0	0	0	0	0	0	0	0	0	0	0	0	0	0	0	0	0	0
11	11	77022.9	77086.9	63.967	18.2038	PAK1;	0	0	0	0	0	0	0	0	0	0	0	0	0	0	0	0	0	0	0	0
3	10	108441	108778	337.603	18.149	RP11-148O7.2;RETNLB;MORC1;	0	2	0	1	1	0	0	0	0	0	0	0	0	0	1	0	0	1	0	0
2	0	46205.8	46260.8	55.019	18.1478	PRKCE;	0	0	0	0	0	0	0	0	0	0	0	0	0	0	0	0	0	0	0	0
12	1	21864.8	21920.8	56.053	18.1223	RP11-59N23.3;KCNJ8;	1	0	1	0	0	0	0	1	0	0	0	0	0	0	0	0	0	0	0	0
3	2	47983.1	48056.4	73.286	18.1076	MAP4;	3	0	3	0	0	0	1	1	0	1	0	0	0	0	0	0	0	0	0	0
1	19	201769	201823	54.115	18.1065	NAV1;IPO9;	1	0	1	0	0	0	0	0	1	0	0	0	0	0	0	0	0	0	0	0
1	6	92751.1	92857.7	106.566	18.0519	GLMN;RPAP2;	4	1	4	0	1	0	1	1	1	1	0	0	0	0	0	0	0	0	1	0
4	19	141322	141344	21.883	18.0267	CLGN;	0	0	0	0	0	0	0	0	0	0	0	0	0	0	0	0	0	0	0	0
14	9	71416	71484.5	68.566	17.9898	PCNX1;	0	0	0	0	0	0	0	0	0	0	0	0	0	0	0	0	0	0	0	0
7	12	128586	128698	111.775	17.9868	IRF5;TNPO3;	2	0	2	0	0	0	1	0	0	1	0	0	0	0	0	0	0	0	0	0
8	8	54862.9	54902.7	39.728	17.968	RGS20;TCEA1;	1	0	1	0	0	0	1	0	0	0	0	0	0	0	0	0	0	0	0	0
10	10	100951	101001	49.496	17.9314	HPSE2;	2	0	2	0	0	0	0	1	0	1	0	0	0	0	0	0	0	0	0	0
10	4	52567.9	52625.8	57.974	17.9107	A1CF;	2	0	2	0	0	0	0	1	1	0	0	0	0	0	0	0	0	0	0	0
7	3	40842	40890	48.007	17.8617	SUGCT;	1	0	1	0	0	0	0	0	0	1	0	0	0	0	0	0	0	0	0	0
18	4	46709	46773.6	64.524	17.8473	DYM;	2	0	2	0	0	0	0	1	1	0	0	0	0	0	0	0	0	0	0	0
16	5	58566.7	58589.1	22.441	17.8299	CNOT1;	0	0	0	0	0	0	0	0	0	0	0	0	0	0	0	0	0	0	0	0
13	11	89326.6	89326.6	0	17.7906		0	0	0	0	0	0	0	0	0	0	0	0	0	0	0	0	0	0	0	0
4	24	168131	168154	23.108	17.79	SPOCK3;	3	0	3	0	0	0	0	1	1	1	0	0	0	0	0	0	0	0	0	0
3	1	46139.2	46713.2	573.978	17.7768	CCR3;CCR1;RTP3;LRRC2;TDGF1;SNORD77;ALS2CL;	3	0	3	0	0	0	1	0	1	1	0	0	0	0	0	0	0	0	0	0
15	4	95515.9	95574.2	58.322	17.7621	RP11-255M2.1;	0	0	0	0	0	0	0	0	0	0	0	0	0	0	0	0	0	0	0	0
9	1	23842.3	23902.1	59.788	17.7402	RP11-321L2.1;RP11-321L2.2;	1	0	1	0	0	0	0	1	0	0	0	0	0	0	0	0	0	0	0	0
7	8	85379.1	85379.1	0	17.7048		0	0	0	0	0	0	0	0	0	0	0	0	0	0	0	0	0	0	0	0
6	9	93807.7	93817.4	9.698	17.6633	RP1-23E21.2;	1	0	1	0	0	0	0	0	0	1	0	0	0	0	0	0	0	0	0	0
5	8	101747	101811	64.638	17.6364	SLCO6A1;	1	0	1	0	0	0	0	1	0	0	0	0	0	0	0	0	0	0	0	0
11	4	38574.9	38574.9	0	17.6339		3	0	3	0	0	0	1	0	1	1	0	0	0	0	0	0	0	0	0	0
8	19	95395.8	95434.6	38.834	17.6287	RAD54B;	3	0	3	0	0	0	1	0	1	1	0	0	0	0	0	0	0	0	0	0
3	16	163884	163904	19.907	17.6141	MIR1263;	4	0	4	0	0	0	1	1	1	1	0	0	0	0	0	0	0	0	0	0
21	0	18492.2	18492.2	0	17.6117		0	0	0	0	0	0	0	0	0	0	0	0	0	0	0	0	0	0	0	0
14	11	98736.6	98757	20.41	17.593		0	0	0	0	0	0	0	0	0	0	0	0	0	0	0	0	0	0	0	0
4	21	146862	146884	22.131	17.5915	Y_RNA;	2	0	2	0	0	0	0	1	0	1	0	0	0	0	0	0	0	0	0	0
11	2	27742.1	27763	20.91	17.5569	RP11-587D21.4;	2	0	2	0	0	0	0	0	1	1	0	0	0	0	0	0	0	0	0	0
3	15	163368	163378	9.655	17.5425		0	0	0	0	0	0	0	0	0	0	0	0	0	0	0	0	0	0	0	0
4	8	72223.8	72231.9	8.182	17.5398	SLC4A4;	2	0	2	0	0	0	1	1	0	0	0	0	0	0	0	0	0	0	0	0
7	9	86036.8	86036.8	0	17.5295		0	0	0	0	0	0	0	0	0	0	0	0	0	0	0	0	0	0	0	0
3	0	27175.5	27208.2	32.675	17.5273	NEK10;	1	4	1	0	4	0	0	0	0	1	0	0	0	0	0	1	1	1	1	0
11	10	63658.9	63716.7	57.802	17.5217	MARK2;RCOR2;NAA40;	0	3	0	0	3	0	0	0	0	0	0	0	0	0	0	0	1	1	1	0
4	4	34413.9	34413.9	0	17.52		2	4	2	4	0	0	1	0	0	1	1	0	1	1	1	0	0	0	0	0
9	5	91748.4	91792.5	44.142	17.4985	SHC3;	1	0	1	0	0	0	0	0	0	1	0	0	0	0	0	0	0	0	0	0
1	4	69577.1	69632.9	55.842	17.4978	RP11-424D14.1;	2	0	2	0	0	0	0	1	0	1	0	0	0	0	0	0	0	0	0	0
3	17	193241	193270	29.467	17.4868	ATP13A4;	0	0	0	0	0	0	0	0	0	0	0	0	0	0	0	0	0	0	0	0
6	15	158727	158748	21.286	17.4729	TULP4;	3	0	3	0	0	0	1	0	1	1	0	0	0	0	0	0	0	0	0	0
4	20	145313	145375	62.046	17.4614		1	0	1	0	0	0	0	1	0	0	0	0	0	0	0	0	0	0	0	0
8	12	65283.7	65300.1	16.408	17.4242	MIR124-2HG;	1	0	1	0	0	0	0	0	0	1	0	0	0	0	0	0	0	0	0	0
11	12	94598.7	94624	25.246	17.4068	AMOTL1;RP11-856F16.2;	2	0	2	0	0	0	0	1	1	0	0	0	0	0	0	0	0	0	0	0
10	14	115507	115529	21.399	17.357	PLEKHS1;	0	0	0	0	0	0	0	0	0	0	0	0	0	0	0	0	0	0	0	0
6	5	75144.6	75270.2	125.592	17.2578	RP11-554D15.1;	3	0	3	0	0	0	1	1	0	1	0	0	0	0	0	0	0	0	0	0
9	8	115084	115611	527.307	17.2409	PTBP3;SNX30;	2	0	2	0	0	0	1	1	0	0	0	0	0	0	0	0	0	0	0	0
9	4	86297.3	86324.5	27.211	17.2304	UBQLN1;	0	0	0	0	0	0	0	0	0	0	0	0	0	0	0	0	0	0	0	0
13	9	78291.5	78313.6	22.055	17.218	SLAIN1;	3	0	3	0	0	0	1	0	1	1	0	0	0	0	0	0	0	0	0	0
2	4	90061.1	90065.4	4.28	17.2051	IGKV6D-21;	0	0	0	0	0	0	0	0	0	0	0	0	0	0	0	0	0	0	0	0
10	1	9795.83	9804.99	9.156	17.1755	RP5-1051H14.2;	0	0	0	0	0	0	0	0	0	0	0	0	0	0	0	0	0	0	0	0
12	0	11520.4	11548.6	28.208	17.1483	PRB1;PRB2;	0	0	0	0	0	0	0	0	0	0	0	0	0	0	0	0	0	0	0	0
8	21	112053	112054	0.182	17.0976		3	0	3	0	0	0	1	0	1	1	0	0	0	0	0	0	0	0	0	0
1	11	117978	117999	21.801	17.0914	MAN1A2;	1	0	1	0	0	0	1	0	0	0	0	0	0	0	0	0	0	0	0	0
6	14	145518	145549	31.506	17.0902		0	0	0	0	0	0	0	0	0	0	0	0	0	0	0	0	0	0	0	0
2	5	96797.1	96841.8	44.645	17.0891	ASTL;DUSP2;	0	0	0	0	0	0	0	0	0	0	0	0	0	0	0	0	0	0	0	0
14	2	30729.3	30753.1	23.815	17.0535	CTD-2251F13.1;	0	0	0	0	0	0	0	0	0	0	0	0	0	0	0	0	0	0	0	0
11	1	16669.7	16709.3	39.643	17.0415	SOX6;	2	0	2	0	0	0	1	0	1	0	0	0	0	0	0	0	0	0	0	0
12	16	113376	113835	458.533	17.0387	OAS3;SDS;	3	1	3	0	1	0	1	1	0	1	0	0	0	0	0	0	0	0	0	1
11	16	126135	126146	11.233	17.0349	SRPRA;FOXRED1;	2	2	2	2	0	0	1	0	1	0	1	0	0	0	1	0	0	0	0	0
16	6	59786.6	59817.3	30.777	17.0304	APOOP5;	0	0	0	0	0	0	0	0	0	0	0	0	0	0	0	0	0	0	0	0
18	3	44065.3	44079	13.616	17.0216	LOXHD1;	1	0	1	0	0	0	0	0	0	1	0	0	0	0	0	0	0	0	0	0
17	1	35760.8	35766	5.19	16.9787		0	0	0	0	0	0	0	0	0	0	0	0	0	0	0	0	0	0	0	0
12	8	74428.1	74441.5	13.37	16.9761	RP11-711C17.2;	1	5	1	1	4	0	0	0	0	1	1	0	0	0	0	1	0	1	1	1
14	1	27331.8	27345	13.141	16.9409	RP11-384J4.2;MIR4307HG;	1	0	1	0	0	0	0	1	0	0	0	0	0	0	0	0	0	0	0	0
11	6	47753.4	47760.8	7.398	16.8903	FNBP4;	1	0	1	0	0	0	1	0	0	0	0	0	0	0	0	0	0	0	0	0
12	2	23075.2	23088.3	13.114	16.843	RP11-114G22.1;	0	0	0	0	0	0	0	0	0	0	0	0	0	0	0	0	0	0	0	0
9	2	24539.6	24543	3.418	16.8122	IZUMO3;	1	0	1	0	0	0	1	0	0	0	0	0	0	0	0	0	0	0	0	0
2	9	120578	120592	13.451	16.8047	PTPN4;	2	0	2	0	0	0	0	0	1	1	0	0	0	0	0	0	0	0	0	0
18	8	70530.3	70536	5.731	16.7992	NETO1;	0	0	0	0	0	0	0	0	0	0	0	0	0	0	0	0	0	0	0	0
10	6	69846.7	69854.2	7.504	16.7879		1	4	1	4	0	0	0	0	0	1	1	1	1	0	1	0	0	0	0	0
17	2	50043.6	50072.7	29.081	16.733	CA10;	0	0	0	0	0	0	0	0	0	0	0	0	0	0	0	0	0	0	0	0
4	13	107028	107046	18.482	16.7326	TBCK;	2	0	2	0	0	0	1	0	1	0	0	0	0	0	0	0	0	0	0	0
5	3	67850.9	67852.1	1.218	16.7077		0	0	0	0	0	0	0	0	0	0	0	0	0	0	0	0	0	0	0	0
7	1	20392.8	20912.6	519.765	16.7007	ITGB8;AC005251.3;LINC01162;	3	0	3	0	0	0	0	1	1	1	0	0	0	0	0	0	0	0	0	0
15	3	82573.8	82573.8	0	16.7002		2	0	2	0	0	0	1	0	1	0	0	0	0	0	0	0	0	0	0	0
18	7	69666	69666.1	0.092	16.6849		1	0	1	0	0	0	0	0	0	1	0	0	0	0	0	0	0	0	0	0
4	18	130692	130694	1.798	16.6285	RP11-519M16.1;RP11-422J15.1;	3	0	3	0	0	0	0	1	1	1	0	0	0	0	0	0	0	0	0	0
5	9	102357	102358	0.666	16.6263	PAM;	2	0	2	0	0	0	0	1	0	1	0	0	0	0	0	0	0	0	0	0
12	7	70516.8	70550.9	34.09	16.6152	LINC01481;	2	1	2	1	0	0	1	1	0	0	0	0	0	0	1	0	0	0	0	0
3	4	52027.3	52030.4	3.027	16.6149	RPL29;	2	0	2	0	0	0	1	0	1	0	0	0	0	0	0	0	0	0	0	0
4	23	162954	162962	8.362	16.593	FSTL5;	2	0	2	0	0	0	0	1	0	1	0	0	0	0	0	0	0	0	0	0
12	5	30825.6	30835.3	9.628	16.5555	IPO8;	0	0	0	0	0	0	0	0	0	0	0	0	0	0	0	0	0	0	0	0
1	8	98216.8	98220.3	3.517	16.51	DPYD;	1	0	1	0	0	0	0	0	1	0	0	0	0	0	0	0	0	0	0	0
15	1	49485.3	49489.1	3.809	16.4982	GALK2;	0	0	0	0	0	0	0	0	0	0	0	0	0	0	0	0	0	0	0	0
6	1	33108	33142.8	34.757	16.4814	HLA-DPA3;HCG24;COL11A2;	4	2	4	2	0	0	1	1	1	1	1	1	0	0	0	0	0	0	0	0
4	22	148122	148122	0	16.4675		2	0	2	0	0	0	0	1	0	1	0	0	0	0	0	0	0	0	0	0
1	13	154423	154424	0.955	16.4551	IL6R;	0	0	0	0	0	0	0	0	0	0	0	0	0	0	0	0	0	0	0	0
4	1	10288.9	10292	3.102	16.4369	AC006499.3;	0	1	0	0	1	0	0	0	0	0	0	0	0	0	0	0	1	0	0	0
1	16	167301	167301	0.457	16.4164	POU2F1;	0	0	0	0	0	0	0	0	0	0	0	0	0	0	0	0	0	0	0	0
4	11	92954	92954.4	0.496	16.4151		4	0	4	0	0	0	1	1	1	1	0	0	0	0	0	0	0	0	0	0

## Sheet: AFR-GWD
Chrsme	Block	Begin	End	Size (Kb)	max CSS	Genes	wth_sharing	btw_sharing	AFR_sharing	EUR_sharing	ASI_sharing	Share_ESN	Share_GWD	Share_LWK	Share_MSL	Share_YRI	Share_CEU	Share_FIN	Share_GBR	Share_IBS	Share_TSI	Share_CDX	Share_CHB	Share_CHS	Share_JPT	Share_KHV
5	11	86511.5	88048.8	1537.26	45.2934	CTC-242N15.1;RASA1;CCNH;RNU6-727P;CTD-2316B1.1;TMEM161B;TMEM161B-AS1;LINC00430;SNORA70;CTC-498M16.2;CTC-498M16.4;LINC00461;CTC-470C15.1;CTC-467M3.1;CTC-467M3.3;MEF2C;	4	1	4	0	1	1	0	1	1	1	0	0	0	0	0	0	0	0	0	1
3	6	50388.6	52060.2	1671.63	40.586	XXcos-LUCA11.5;CACNA2D2;HEMK1;CISH;MAPKAPK3;RP11-804H8.6;DOCK3;MANF;RAD54L2;TEX264;PCBP4;ABHD14B;ABHD14A-ACY1;RPL29;	4	0	4	0	0	1	0	1	1	1	0	0	0	0	0	0	0	0	0	0
21	0	30654.1	30829.8	175.681	38.7083	LINC00189;BACH1;BACH1-IT1;BACH1-IT2;	3	0	3	0	0	1	0	1	0	1	0	0	0	0	0	0	0	0	0	0
1	25	223277	223398	121.348	37.9432	TLR5;RP11-239E10.2;RP11-239E10.3;SUSD4;	4	0	4	0	0	1	0	1	1	1	0	0	0	0	0	0	0	0	0	0
22	1	35999.9	36393.4	393.472	36.3885	MB;CITF22-62D4.1;APOL6;RP1-41P2.7;RBFOX2;	4	0	4	0	0	1	0	1	1	1	0	0	0	0	0	0	0	0	0	0
10	9	104577	105002	424.744	34.3346	WBP1L;CYP17A1;PFN1P11;BORCS7;AS3MT;RP11-724N1.1;CNNM2;NT5C2;ST13P13;RPEL1;	4	0	4	0	0	1	0	1	1	1	0	0	0	0	0	0	0	0	0	0
4	10	53454.2	53620.6	166.391	34.0692	USP46;USP46-AS1;RP11-177B4.2;DANCR;RP11-177B4.1;ERVMER34-1;	4	0	4	0	0	1	0	1	1	1	0	0	0	0	0	0	0	0	0	0
4	0	66.475	302.934	236.459	33.5805	Z95704.3;ZNF718;RP11-1365D11.1;ZNF876P;RP11-478C6.6;ZNF732;	4	0	4	0	0	1	0	1	1	1	0	0	0	0	0	0	0	0	0	0
2	23	155703	156261	558.542	33.3829	KCNJ3;CBX3P6;AC092625.1;RNU6-1001P;MTCO1P45;MTND2P20;ATP5A1P2;	4	3	4	3	0	1	0	1	1	1	1	0	0	1	1	0	0	0	0	0
13	5	57550.1	58296.2	746.139	32.5375	PRR20A;PRR20FP;MTCO2P3;SLC25A5P4;RPL31P53;PCDH17;	4	1	4	0	1	1	0	1	1	1	0	0	0	0	0	0	1	0	0	0
3	0	19458.7	19710.3	251.611	31.6343	KCNH8;	0	0	0	0	0	0	0	0	0	0	0	0	0	0	0	0	0	0	0	0
1	5	41624.5	41755.2	130.646	30.8182	SCMH1;RP11-399E6.1;	2	0	2	0	0	0	0	0	1	1	0	0	0	0	0	0	0	0	0	0
4	25	129846	130096	249.953	30.7716	SCLT1;C4orf33;RP11-392L5.2;ZSWIM5P3;RP11-378N18.1;	4	0	4	0	0	1	0	1	1	1	0	0	0	0	0	0	0	0	0	0
11	19	118048	118297	249.101	30.3271	SCN2B;JAML;MPZL3;CD3E;RP11-215H18.5;CD3D;CD3G;UBE4A;RP11-770J1.5;ATP5L;RP11-770J1.7;	2	0	2	0	0	0	0	0	1	1	0	0	0	0	0	0	0	0	0	0
16	6	34467.5	34523.3	55.803	30.072	FGFR3P5;RP11-488I20.8;AGGF1P8;	3	0	3	0	0	0	0	1	1	1	0	0	0	0	0	0	0	0	0	0
6	8	83762.2	83867.7	105.553	29.4087	UBE3D;DOPEY1;	3	4	3	0	4	1	0	0	1	1	0	0	0	0	0	1	1	1	1	0
4	19	107755	108412	656.825	29.3616	ACTR6P1;DKK2;RNU6-551P;	4	1	4	0	1	1	0	1	1	1	0	0	0	0	0	0	1	0	0	0
19	4	37898.7	39199.4	1300.72	29.0014	ZNF569;ZNF570;AC016582.2;WDR87;PPP1R14A;SPINT2;CTB-102L5.4;C19orf33;YIF1B;KCNK6;CATSPERG;PSMD8;GGN;SPRED3;FAM98C;RASGRP4;EIF3K;ACTN4;	4	5	4	0	5	1	0	1	1	1	0	0	0	0	0	1	1	1	1	1
3	4	45440.8	47196.2	1755.44	28.9386	LARS2;FYCO1;XCR1;FLT1P1;CCR3;CCR1;UQCRC2P1;CCR2;CCR5;RP11-24F11.2;LTF;RTP3;LRRC2;LRRC2-AS1;TDGF1;SETD2;	4	2	4	2	0	1	0	1	1	1	0	0	1	0	1	0	0	0	0	0
13	2	48598.4	48740.2	141.734	28.7863	SUCLA2;NUDT15;MED4;POLR2KP2;	4	0	4	0	0	1	0	1	1	1	0	0	0	0	0	0	0	0	0	0
11	18	110563	111019	456.504	28.7424	ARHGAP20;HNRNPA1P60;	4	0	4	0	0	1	0	1	1	1	0	0	0	0	0	0	0	0	0	0
11	0	9916.62	10333.8	417.224	28.7311	SBF2;RP11-351I24.1;ADM;	4	2	4	2	0	1	0	1	1	1	0	0	0	1	1	0	0	0	0	0
4	8	48541	49061.6	520.572	28.3838	FRYL;OCIAD1;OCIAD2;CWH43;	3	0	3	0	0	1	0	0	1	1	0	0	0	0	0	0	0	0	0	0
2	13	111545	111834	289.002	28.2723	ACOXL;	1	0	1	0	0	0	0	0	1	0	0	0	0	0	0	0	0	0	0	0
2	14	114386	114426	39.124	28.2155	RABL2A;RP11-395L14.17;RP11-395L14.13;AC017074.1;	3	0	3	0	0	1	0	0	1	1	0	0	0	0	0	0	0	0	0	0
19	0	10707.2	11088.2	381.06	28.0603	CTC-539A10.7;SLC44A2;ILF3;QTRT1;DNM2;TMED1;AC007229.3;C19orf38;CARM1;YIPF2;C19orf52;SMARCA4;	4	0	4	0	0	1	0	1	1	1	0	0	0	0	0	0	0	0	0	0
6	3	62707.8	62992.4	284.666	27.8735	KHDRBS2;	3	0	3	0	0	0	0	1	1	1	0	0	0	0	0	0	0	0	0	0
11	11	62094.7	62564	469.297	27.7839	NPM1P35;ASRGL1;RP11-831H9.11;LBHD1;UQCC3;UBXN1;LRRN4CL;BSCL2;HNRNPUL2;TTC9C;ZBTB3;POLR2G;TAF6L;TMEM179B;TMEM223;NXF1;	3	0	3	0	0	1	0	1	1	0	0	0	0	0	0	0	0	0	0	0
16	4	22935.9	23217.8	281.969	27.6022	RP11-20G6.2;USP31;SCNN1G;	4	0	4	0	0	1	0	1	1	1	0	0	0	0	0	0	0	0	0	0
1	16	160949	161168	219.422	27.4997	F11R;RP11-544M22.13;TSTD1;USF1;ARHGAP30;NECTIN4;PFDN2;NIT1;DEDD;ACA64;UFC1;PPOX;B4GALT3;ADAMTS4;	4	0	4	0	0	1	0	1	1	1	0	0	0	0	0	0	0	0	0	0
5	22	173349	173492	142.822	27.3377	CPEB4;C5orf47;RPL12P22;HMP19;	0	1	0	0	1	0	0	0	0	0	0	0	0	0	0	0	0	0	0	1
16	7	48323.1	48434.6	111.506	27.123	LONP2;SIAH1;	4	0	4	0	0	1	0	1	1	1	0	0	0	0	0	0	0	0	0	0
12	8	82050.1	82158.1	108.075	26.897	PPFIA2;	4	0	4	0	0	1	0	1	1	1	0	0	0	0	0	0	0	0	0	0
5	9	72102.7	72400.2	297.481	26.6944	CTD-2631K10.1;TNPO1;FCHO2;	4	1	4	1	0	1	0	1	1	1	0	0	0	0	1	0	0	0	0	0
6	10	87394.9	87748.7	353.817	26.4919	RP1-253B10.1;RP1-253B10.2;HTR1E;	4	0	4	0	0	1	0	1	1	1	0	0	0	0	0	0	0	0	0	0
1	11	92579.5	92945	365.494	26.2731	BTBD8;KIAA1107;RP4-621B10.8;RP4-775D17.1;C1orf146;GLMN;RPAP2;GFI1;	4	2	4	0	2	1	0	1	1	1	0	0	0	0	0	0	0	1	1	0
11	13	73412.4	73521.3	108.989	26.2048	RAB6A;MRPL48;	1	0	1	0	0	0	0	1	0	0	0	0	0	0	0	0	0	0	0	0
2	30	182098	182693	595.298	25.9093	AC104820.2;RNU6ATAC19P;	4	0	4	0	0	1	0	1	1	1	0	0	0	0	0	0	0	0	0	0
1	4	39730.2	39896	165.787	25.8638	MACF1;	1	0	1	0	0	0	0	0	1	0	0	0	0	0	0	0	0	0	0	0
20	1	20469	21163.5	694.507	25.4373	RALGAPA2;LLPHP1;KIZ;KIZ-AS1;RP5-872K7.7;RPS15AP1;	3	0	3	0	0	1	0	0	1	1	0	0	0	0	0	0	0	0	0	0
5	2	43442.9	44091.9	649.044	25.4073	TMEM267;C5orf34;PAIP1;NNT-AS1;AMD1P3;RP11-8L21.1;	4	7	4	3	4	1	0	1	1	1	0	1	0	1	1	1	1	1	0	1
12	7	79584.9	80327.3	742.44	24.9781	SYT1;NOP56P3;PAWR;PPP1R12A;	4	3	4	3	0	1	0	1	1	1	0	0	1	1	1	0	0	0	0	0
6	7	75071.4	75330.5	259.116	24.5696	RP11-554D15.1;RP11-554D15.2;	4	0	4	0	0	1	0	1	1	1	0	0	0	0	0	0	0	0	0	0
2	39	207141	207305	163.72	24.4085	ZDBF2;AC017081.2;HNRNPA1P51;ADAM23;	4	0	4	0	0	1	0	1	1	1	0	0	0	0	0	0	0	0	0	0
4	22	119083	119463	380.067	24.2297	NDST3;CEP170P1;	2	0	2	0	0	0	0	1	0	1	0	0	0	0	0	0	0	0	0	0
2	19	145008	145104	96.325	24.0233	GTDC1;	1	0	1	0	0	0	0	1	0	0	0	0	0	0	0	0	0	0	0	0
1	6	51604	51804.7	200.708	23.9072	C1orf185;CFL1P2;LINC01562;RNF11;TTC39A;	3	0	3	0	0	1	0	1	1	0	0	0	0	0	0	0	0	0	0	0
15	5	77444.2	77788.8	344.594	23.7368	PEAK1;HMG20A;	4	0	4	0	0	1	0	1	1	1	0	0	0	0	0	0	0	0	0	0
11	15	85677.1	85785	107.858	23.5853	PICALM;	1	2	1	2	0	0	0	1	0	0	0	1	1	0	0	0	0	0	0	0
8	10	76695.3	76702.5	7.286	23.5174		4	5	4	0	5	1	0	1	1	1	0	0	0	0	0	1	1	1	1	1
9	2	74437.3	74594.4	157.142	23.447	ABHD17B;C9orf85;	4	0	4	0	0	1	0	1	1	1	0	0	0	0	0	0	0	0	0	0
17	2	26386.9	26494.1	107.241	23.3824	NLK;	2	0	2	0	0	0	0	0	1	1	0	0	0	0	0	0	0	0	0	0
20	5	37349.3	37709.4	360.174	23.3166	SLC32A1;ACTR5;PPP1R16B;FAM83D;DHX35;	4	0	4	0	0	1	0	1	1	1	0	0	0	0	0	0	0	0	0	0
20	6	39631.7	39859.5	227.817	23.1497	RNU2-52P;TOP1;PLCG1;ZHX3;	0	1	0	1	0	0	0	0	0	0	0	0	0	0	1	0	0	0	0	0
2	35	194598	194794	196.327	23.1411		4	0	4	0	0	1	0	1	1	1	0	0	0	0	0	0	0	0	0	0
1	26	225673	225757	84.155	23.1293	ENAH;	4	0	4	0	0	1	0	1	1	1	0	0	0	0	0	0	0	0	0	0
15	0	44668.7	44875.1	206.347	23.0497	CASC4;CTDSPL2;EIF3J;SPG11;	4	0	4	0	0	1	0	1	1	1	0	0	0	0	0	0	0	0	0	0
5	12	91554.3	91636	81.644	23.011	RP11-348J24.2;	0	0	0	0	0	0	0	0	0	0	0	0	0	0	0	0	0	0	0	0
2	41	231954	232019	64.888	22.9871	PSMD1;HTR2B;	0	0	0	0	0	0	0	0	0	0	0	0	0	0	0	0	0	0	0	0
9	6	100564	100748	183.783	22.9287	PTCSC2;FOXE1;TRMO;HEMGN;ANP32B;	4	0	4	0	0	1	0	1	1	1	0	0	0	0	0	0	0	0	0	0
18	0	23624.6	23717.2	92.56	22.8715	SS18;RPS24P18;PSMA8;	0	3	0	3	0	0	0	0	0	0	1	0	0	1	1	0	0	0	0	0
7	5	45576.7	45707.4	130.681	22.7655	AC073325.1;ADCY1;	3	0	3	0	0	1	0	1	0	1	0	0	0	0	0	0	0	0	0	0
11	1	16052.2	16156.3	104.126	22.6978	SOX6;	3	0	3	0	0	0	0	1	1	1	0	0	0	0	0	0	0	0	0	0
16	2	14643.7	14777.8	134.102	22.6454	PARN;BFAR;PLA2G10;	4	0	4	0	0	1	0	1	1	1	0	0	0	0	0	0	0	0	0	0
3	9	69820.8	69930.5	109.67	22.6093	MITF;	3	0	3	0	0	1	0	1	0	1	0	0	0	0	0	0	0	0	0	0
14	5	61121	61219.2	98.229	22.5613	SIX1;SIX4;MNAT1;	4	0	4	0	0	1	0	1	1	1	0	0	0	0	0	0	0	0	0	0
3	14	120204	120321	116.588	22.5177	RP11-359H3.4;RP11-359H3.1;NDUFB4;	4	0	4	0	0	1	0	1	1	1	0	0	0	0	0	0	0	0	0	0
2	38	200692	201225	532.813	22.5009	FTCDNL1;AC108032.1;AC073043.1;C2orf69;TYW5;C2orf47;SPATS2L;	4	1	4	1	0	1	0	1	1	1	0	0	1	0	0	0	0	0	0	0
4	16	100481	100580	98.6	22.4821	TRMT10A;MTTP;RP11-766F14.1;RP11-766F14.2;	0	3	0	0	3	0	0	0	0	0	0	0	0	0	0	1	1	0	1	0
1	20	186411	186529	117.681	22.4729	PDC;GS1-304P7.3;	0	0	0	0	0	0	0	0	0	0	0	0	0	0	0	0	0	0	0	0
3	13	99617.8	99707.2	89.493	22.443	FILIP1L;	1	0	1	0	0	0	0	0	1	0	0	0	0	0	0	0	0	0	0	0
1	2	14031.8	14086.5	54.78	22.4162	PRDM2;	0	0	0	0	0	0	0	0	0	0	0	0	0	0	0	0	0	0	0	0
6	16	122751	122850	99.033	22.3689	HSF2;SERINC1;PKIB;	3	0	3	0	0	1	0	0	1	1	0	0	0	0	0	0	0	0	0	0
14	8	84565.3	84644.8	79.568	22.0461	MTND4P33;MTND5P35;MTCYBP27;	0	0	0	0	0	0	0	0	0	0	0	0	0	0	0	0	0	0	0	0
8	1	37532.4	38152.6	620.181	22.0331	RP11-346L1.2;ZNF703;RP11-863K10.2;RP11-863K10.7;BAG4;DDHD2;PLPP5;WHSC1L1;	4	0	4	0	0	1	0	1	1	1	0	0	0	0	0	0	0	0	0	0
4	18	106756	107051	294.627	22.0151	NPNT;TBCK;	4	0	4	0	0	1	0	1	1	1	0	0	0	0	0	0	0	0	0	0
16	10	71590	72488.3	898.28	22.0098	TAT;MARVELD3;PHLPP2;AP1G1;RP11-417N10.3;ATXN1L;ZNF821;IST1;DHODH;TXNL4B;HP;HPR;PMFBP1;RP11-328J14.1;LINC01572;AC004158.3;	4	0	4	0	0	1	0	1	1	1	0	0	0	0	0	0	0	0	0	0
4	28	181028	181086	58.416	21.9988		3	0	3	0	0	0	0	1	1	1	0	0	0	0	0	0	0	0	0	0
6	14	111713	111841	127.414	21.9828	REV3L;RP3-415N12.1;TRAF3IP2-AS1;	3	0	3	0	0	1	0	1	1	0	0	0	0	0	0	0	0	0	0	0
7	1	27775.7	27869.8	94.077	21.9726	TAX1BP1;JAZF1;	0	0	0	0	0	0	0	0	0	0	0	0	0	0	0	0	0	0	0	0
7	11	87328	87517.4	189.424	21.9267	ABCB1;RUNDC3B;SLC25A40;DBF4;	2	0	2	0	0	0	0	0	1	1	0	0	0	0	0	0	0	0	0	0
9	7	102344	102486	142.375	21.9035	RP11-554F20.1;	1	0	1	0	0	0	0	1	0	0	0	0	0	0	0	0	0	0	0	0
9	13	131471	131592	121.396	21.7234	PKN3;ZDHHC12;ZER1;TBC1D13;ENDOG;C9orf114;	0	0	0	0	0	0	0	0	0	0	0	0	0	0	0	0	0	0	0	0
18	6	77421.4	77518.3	96.939	21.661	RP11-567M16.3;CTDP1;	0	0	0	0	0	0	0	0	0	0	0	0	0	0	0	0	0	0	0	0
20	3	33313.6	33391.1	77.575	21.6174	NCOA6;	1	0	1	0	0	1	0	0	0	0	0	0	0	0	0	0	0	0	0	0
4	9	52855.5	52927.2	71.694	21.5423	LRRC66;SGCB;RP11-535C7.1;SPATA18;	4	0	4	0	0	1	0	1	1	1	0	0	0	0	0	0	0	0	0	0
11	14	84833.8	85100.9	267.046	21.5353	DLG2;	0	0	0	0	0	0	0	0	0	0	0	0	0	0	0	0	0	0	0	0
8	2	38682.5	38725.4	42.853	21.4411	TACC1;	3	0	3	0	0	1	0	1	0	1	0	0	0	0	0	0	0	0	0	0
5	7	55046.2	55110.5	64.254	21.4303	DDX4;	3	0	3	0	0	0	0	1	1	1	0	0	0	0	0	0	0	0	0	0
5	3	45864.8	45900.3	35.474	21.3997	CTD-2013M15.1;	0	0	0	0	0	0	0	0	0	0	0	0	0	0	0	0	0	0	0	0
14	3	55635.7	55679.7	43.986	21.3659	DLGAP5;RP11-698F20.3;	3	0	3	0	0	1	0	1	1	0	0	0	0	0	0	0	0	0	0	0
7	19	131008	131097	88.943	21.2806	MKLN1;	0	0	0	0	0	0	0	0	0	0	0	0	0	0	0	0	0	0	0	0
12	2	46985.2	47180.4	195.144	21.2775	RP11-446N19.1;OR7A19P;MARK3P1;SLC38A4;	3	0	3	0	0	1	0	0	1	1	0	0	0	0	0	0	0	0	0	0
11	20	126116	126181	64.78	21.1379	FAM118B;SRPRA;FOXRED1;TIRAP;RP11-712L6.5;DCPS;	2	2	2	2	0	1	0	0	1	0	1	0	0	0	1	0	0	0	0	0
3	19	146556	146556	0	21.1048		1	0	1	0	0	0	0	0	0	1	0	0	0	0	0	0	0	0	0	0
3	12	89901.4	89938.6	37.211	21.0997		3	0	3	0	0	1	0	0	1	1	0	0	0	0	0	0	0	0	0	0
1	8	85485.8	85551.9	66.148	21.0801	MCOLN3;WDR63;	0	0	0	0	0	0	0	0	0	0	0	0	0	0	0	0	0	0	0	0
1	19	172467	172539	72.711	21.0471	SUCO;	0	0	0	0	0	0	0	0	0	0	0	0	0	0	0	0	0	0	0	0
13	3	52641.9	52734.9	92.962	21.0162	NEK5;NEK3;	4	0	4	0	0	1	0	1	1	1	0	0	0	0	0	0	0	0	0	0
7	0	23780.6	23876.8	96.172	20.9631	STK31;	3	0	3	0	0	1	0	0	1	1	0	0	0	0	0	0	0	0	0	0
6	0	31936.1	33361.7	1425.67	20.9595	SKIV2L;DXO;STK19;C4A;C4B;HCG23;BTNL2;HLA-DRB5;RNU1-61P;HLA-DRB1;HLA-DQA1;HLA-DQB1;RALY;XXbac-BPG181M17.5;HLA-DMA;DAXX;MYL8P;LYPLA2P1;KIFC1;	4	4	4	2	2	1	0	1	1	1	1	1	0	0	0	1	0	0	1	0
6	20	158698	158806	107.584	20.9304	TULP4;	3	0	3	0	0	1	0	0	1	1	0	0	0	0	0	0	0	0	0	0
18	4	45354.8	45455.1	100.293	20.9206	SMAD2;	1	0	1	0	0	0	0	0	0	1	0	0	0	0	0	0	0	0	0	0
8	7	60881.8	60955.4	73.554	20.8707		2	0	2	0	0	0	0	1	1	0	0	0	0	0	0	0	0	0	0	0
5	18	130234	130234	0	20.8611		1	1	1	1	0	0	0	1	0	0	0	0	0	1	0	0	0	0	0	0
13	4	53917.9	55147.6	1229.77	20.8609	LINC00558;LINC00458;	3	0	3	0	0	1	0	1	1	0	0	0	0	0	0	0	0	0	0	0
2	10	87372	87456.7	84.703	20.8291	AC083899.3;AC083899.1;	2	0	2	0	0	1	0	0	1	0	0	0	0	0	0	0	0	0	0	0
13	12	89170.9	89202.6	31.705	20.8189	LINC00433;	2	0	2	0	0	0	0	1	0	1	0	0	0	0	0	0	0	0	0	0
9	5	95349.5	95533.7	184.203	20.7446	CENPP;IPPK;RP11-476B13.2;BICD2;	3	0	3	0	0	1	0	1	1	0	0	0	0	0	0	0	0	0	0	0
9	8	115019	115089	69.576	20.7274	PTBP3;	3	1	3	1	0	1	0	1	1	0	0	0	0	1	0	0	0	0	0	0
5	13	94528.5	94620.9	92.445	20.6675	MCTP1;	1	0	1	0	0	0	0	0	1	0	0	0	0	0	0	0	0	0	0	0
4	4	19470.6	19599.2	128.671	20.5449	RP11-608O21.1;	4	0	4	0	0	1	0	1	1	1	0	0	0	0	0	0	0	0	0	0
5	5	52237.4	53010.5	773.133	20.5418	ITGA1;CTD-2175A23.1;ITGA2;MOCS2;CTD-2366F13.1;RP11-94D20.1;NDUFS4;	3	2	3	2	0	0	0	1	1	1	0	0	0	1	1	0	0	0	0	0
7	6	63930.3	63983.6	53.337	20.5138	ZNF680P1;HNRNPCP7;	1	0	1	0	0	0	0	0	1	0	0	0	0	0	0	0	0	0	0	0
9	12	125601	125969	367.915	20.5136	RC3H2;ZBTB6;ZBTB26;RABGAP1;MIR600HG;STRBP;	2	0	2	0	0	1	0	0	0	1	0	0	0	0	0	0	0	0	0	0
9	1	28628.4	28688.5	60.121	20.5076	LINGO2;	0	0	0	0	0	0	0	0	0	0	0	0	0	0	0	0	0	0	0	0
19	3	34819.3	34921.2	101.865	20.5029	KIAA0355;GPI;RP11-618P17.4;PDCD2L;UBA2;	4	0	4	0	0	1	0	1	1	1	0	0	0	0	0	0	0	0	0	0
10	8	103148	103445	297.256	20.4961	BTRC;POLL;DPCD;FBXW4;	0	0	0	0	0	0	0	0	0	0	0	0	0	0	0	0	0	0	0	0
6	9	86141.7	86801.6	659.95	20.4633	TPT1P6;NT5E;SNX14;SYNCRIP;RPL7P27;	2	1	2	0	1	0	0	1	0	1	0	0	0	0	0	0	0	0	0	1
10	10	124210	124262	52.735	20.442	ARMS2;HTRA1;	0	0	0	0	0	0	0	0	0	0	0	0	0	0	0	0	0	0	0	0
8	19	113527	114467	939.906	20.3458	CSMD3;	4	3	4	3	0	1	0	1	1	1	1	1	1	0	0	0	0	0	0	0
9	11	124157	124233	75.58	20.2518	RP11-162D16.2;GGTA1P;	0	1	0	0	1	0	0	0	0	0	0	0	0	0	0	0	1	0	0	0
4	5	34388	34413.9	25.877	20.2102		2	5	2	5	0	1	0	0	0	1	1	1	1	1	1	0	0	0	0	0
1	13	113971	114374	402.452	20.2013	MAGI3;RSBN1;PTPN22;	4	0	4	0	0	1	0	1	1	1	0	0	0	0	0	0	0	0	0	0
20	4	34205	34581.6	376.52	20.1948	SPAG4;CPNE1;RBM12;NFS1;PHF20;SCAND1;CNBD2;	4	10	4	5	5	1	0	1	1	1	1	1	1	1	1	1	1	1	1	1
18	5	49424.3	49609.1	184.825	20.1895		3	0	3	0	0	1	0	0	1	1	0	0	0	0	0	0	0	0	0	0
1	12	101381	101504	123.037	20.1622	SLC30A7;DPH5;RP11-421L21.3;	4	0	4	0	0	1	0	1	1	1	0	0	0	0	0	0	0	0	0	0
2	31	187863	187941	77.993	20.122	AC007319.1;	1	0	1	0	0	0	0	0	1	0	0	0	0	0	0	0	0	0	0	0
6	17	126062	126106	44.682	20.0939	HEY2;NCOA7;	0	1	0	0	1	0	0	0	0	0	0	0	0	0	0	0	0	1	0	0
7	20	156464	156547	83.489	20.0889	RNF32;LMBR1;	1	0	1	0	0	1	0	0	0	0	0	0	0	0	0	0	0	0	0	0
3	8	57667.2	57772.3	105.137	20.0724	DENND6A;RP11-755B10.3;SLMAP;	0	0	0	0	0	0	0	0	0	0	0	0	0	0	0	0	0	0	0	0
12	0	26955.4	27025	69.612	20.072	ITPR2;	2	0	2	0	0	1	0	1	0	0	0	0	0	0	0	0	0	0	0	0
15	7	93482.7	93551.5	68.891	20.0621	CHD2;	1	2	1	0	2	0	0	0	1	0	0	0	0	0	0	0	1	0	1	0
3	16	128639	128715	76.006	20.0486	RP11-723O4.6;KIAA1257;	0	1	0	0	1	0	0	0	0	0	0	0	0	0	0	0	0	0	0	1
4	15	92945.6	93022.9	77.298	20.0295		4	0	4	0	0	1	0	1	1	1	0	0	0	0	0	0	0	0	0	0
12	12	88081.2	88325.7	244.51	19.9964	RP11-248E9.1;CYCSP30;RP11-248E9.4;MKRN9P;RP11-248E9.5;RP11-248E9.6;RP11-248E9.7;	0	0	0	0	0	0	0	0	0	0	0	0	0	0	0	0	0	0	0	0
1	14	117960	118040	80.552	19.9693	MAN1A2;	1	1	1	1	0	1	0	0	0	0	0	0	1	0	0	0	0	0	0	0
4	14	87246	87686.2	440.224	19.9585	MAPK10;PTPN13;	3	2	3	0	2	1	0	1	0	1	0	0	0	0	0	0	1	0	0	1
2	6	72558.8	72978.7	419.912	19.9569	EXOC6B;	1	5	1	5	0	0	0	0	1	0	1	1	1	1	1	0	0	0	0	0
5	0	15259.6	15763.5	503.882	19.9506	RP1-137K24.1;FBXL7;	2	0	2	0	0	1	0	0	1	0	0	0	0	0	0	0	0	0	0	0
1	23	211128	212211	1082.92	19.815	KCNH1;INTS7;DTL;	2	4	2	1	3	0	0	1	1	0	0	1	0	0	0	1	0	1	0	1
1	21	191905	192124	218.679	19.8131	RP11-541F9.2;RGS18;	1	0	1	0	0	1	0	0	0	0	0	0	0	0	0	0	0	0	0	0
12	1	29301.4	29581.8	280.414	19.764	FAR2;ERGIC2;OVCH1-AS1;	2	3	2	0	3	1	0	0	1	0	0	0	0	0	0	0	1	0	1	1
14	9	102100	102331	230.633	19.7028	RP11-1029J19.4;RP11-1029J19.5;RP11-796G6.1;LINC00239;PPP2R5C;	4	0	4	0	0	1	0	1	1	1	0	0	0	0	0	0	0	0	0	0
12	10	86850.6	86927.7	77.034	19.6416	MGAT4C;	3	0	3	0	0	1	0	1	1	0	0	0	0	0	0	0	0	0	0	0
2	32	190268	190348	79.586	19.6138	WDR75;AC013439.4;	2	2	2	2	0	0	0	0	1	1	0	0	1	0	1	0	0	0	0	0
2	28	174776	174848	72.535	19.5882	SP3;RP11-394I13.2;	1	0	1	0	0	0	0	0	1	0	0	0	0	0	0	0	0	0	0	0
13	0	41892.1	42462.6	570.482	19.5799	NAA16;TUBBP2;VWA8;	3	1	3	0	1	1	0	0	1	1	0	0	0	0	0	1	0	0	0	0
10	4	74815.3	75307.7	492.436	19.4485	P4HA1;RP11-344N10.5;NUDT13;ECD;FAM149B1;CFAP70;ANXA7;USP54;	0	3	0	3	0	0	0	0	0	0	0	1	0	1	1	0	0	0	0	0
8	14	95338.4	95447.9	109.514	19.4093	RPS4XP10;RAD54B;	3	0	3	0	0	1	0	0	1	1	0	0	0	0	0	0	0	0	0	0
7	7	69547.6	69829.4	281.833	19.406	AUTS2;	4	1	4	1	0	1	0	1	1	1	0	0	0	1	0	0	0	0	0	0
8	4	50137.2	50213.9	76.756	19.3938	RP11-10H3.1;	3	0	3	0	0	1	0	1	0	1	0	0	0	0	0	0	0	0	0	0
6	2	56460.3	56518.2	57.907	19.3889	DST;	1	0	1	0	0	0	0	1	0	0	0	0	0	0	0	0	0	0	0	0
8	15	99622	100711	1088.71	19.344	STK3;VPS13B;	2	0	2	0	0	1	0	0	0	1	0	0	0	0	0	0	0	0	0	0
9	9	117286	117370	83.43	19.3237	RP11-402G3.6;ATP6V1G1;C9orf91;	1	0	1	0	0	0	0	1	0	0	0	0	0	0	0	0	0	0	0	0
6	5	70587.8	70694.2	106.395	19.3156	COL19A1;	3	0	3	0	0	1	0	1	0	1	0	0	0	0	0	0	0	0	0	0
16	1	6339.31	6405.53	66.226	19.3024	RBFOX1;	0	0	0	0	0	0	0	0	0	0	0	0	0	0	0	0	0	0	0	0
16	0	2534.53	2591.13	56.603	19.2933	TBC1D24;RP11-20I23.1;RP11-20I23.3;AMDHD2;CEMP1;PDPK1;	1	0	1	0	0	0	0	0	0	1	0	0	0	0	0	0	0	0	0	0
11	17	108833	108914	81.854	19.2694	RP11-25I9.3;RP11-25I9.2;RNU6-654P;	2	1	2	1	0	0	0	1	0	1	0	0	1	0	0	0	0	0	0	0
5	17	122168	122210	41.596	19.2614	SNX2;CTB-36H16.2;SNX24;	1	0	1	0	0	0	0	0	1	0	0	0	0	0	0	0	0	0	0	0
3	23	163885	163904	19.725	19.2273	MIR1263;	4	0	4	0	0	1	0	1	1	1	0	0	0	0	0	0	0	0	0	0
4	17	104724	104771	46.502	19.2021		0	0	0	0	0	0	0	0	0	0	0	0	0	0	0	0	0	0	0	0
17	1	20088.3	20173.9	85.647	19.1846	SPECC1;	0	3	0	0	3	0	0	0	0	0	0	0	0	0	0	1	1	1	0	0
9	0	24510.2	24570.9	60.708	19.1843	IZUMO3;RP11-20A20.2;	1	0	1	0	0	1	0	0	0	0	0	0	0	0	0	0	0	0	0	0
15	1	49869.3	50663	793.739	19.1346	FAM227B;ATP8B4;HDC;GABPB1;CTD-3110H11.1;GABPB1-AS1;	2	5	2	5	0	0	0	0	1	1	1	1	1	1	1	0	0	0	0	0
2	25	162258	162342	84.066	19.0709	PSMD14;TBR1;AC009487.5;SLC4A10;	2	0	2	0	0	0	0	1	1	0	0	0	0	0	0	0	0	0	0	0
13	11	87560.4	87594	33.593	19.0446	LINC00430;	2	0	2	0	0	1	0	0	0	1	0	0	0	0	0	0	0	0	0	0
8	20	116461	116559	98.159	19.0333	TRPS1;	0	0	0	0	0	0	0	0	0	0	0	0	0	0	0	0	0	0	0	0
13	8	78267.5	78318.1	50.536	19.0329	MIR3665;SLAIN1;	3	0	3	0	0	1	0	0	1	1	0	0	0	0	0	0	0	0	0	0
2	26	172661	172762	100.862	19.0207	SLC25A12;	2	0	2	0	0	0	0	0	1	1	0	0	0	0	0	0	0	0	0	0
4	21	112890	112965	75.162	19.0133	RP11-269F21.3;	1	0	1	0	0	0	0	1	0	0	0	0	0	0	0	0	0	0	0	0
22	0	30121.1	30530	408.898	19.0113	CABP7;ZMAT5;UQCR10;ASCC2;MTMR3;HORMAD2;	3	2	3	2	0	1	0	1	0	1	1	0	0	1	0	0	0	0	0	0
11	10	61164.4	61222	57.533	18.9714	TMEM216;CPSF7;SDHAF2;RP11-286N22.8;	2	0	2	0	0	1	0	0	1	0	0	0	0	0	0	0	0	0	0	0
4	23	123973	124060	87.952	18.9664	SPATA5;	0	3	0	2	1	0	0	0	0	0	0	0	1	1	0	0	1	0	0	0
3	21	158248	158333	84.737	18.9484	RSRC1;RP11-538P18.2;MLF1;MTAPP1;	0	2	0	0	2	0	0	0	0	0	0	0	0	0	0	1	0	0	0	1
2	33	193110	193156	46.113	18.9247		3	0	3	0	0	1	0	1	1	0	0	0	0	0	0	0	0	0	0	0
2	17	141055	141149	93.881	18.8412	LRP1B;	1	1	1	1	0	0	0	0	1	0	0	1	0	0	0	0	0	0	0	0
2	34	193806	193806	0	18.8282		4	0	4	0	0	1	0	1	1	1	0	0	0	0	0	0	0	0	0	0
9	10	120312	120314	1.646	18.8136		0	0	0	0	0	0	0	0	0	0	0	0	0	0	0	0	0	0	0	0
11	9	59409.9	59449.3	39.344	18.7793	PATL1;AP000640.2;	3	0	3	0	0	1	0	0	1	1	0	0	0	0	0	0	0	0	0	0
11	3	32592.7	32654.7	61.949	18.7116	EIF3M;CCDC73;	0	0	0	0	0	0	0	0	0	0	0	0	0	0	0	0	0	0	0	0
4	20	110362	110421	58.422	18.7113	SEC24B;	4	0	4	0	0	1	0	1	1	1	0	0	0	0	0	0	0	0	0	0
2	18	144461	144496	35.735	18.6994	ARHGAP15;	3	0	3	0	0	1	0	1	0	1	0	0	0	0	0	0	0	0	0	0
2	24	160756	160920	164.409	18.681	LY75-CD302;PLA2R1;	1	0	1	0	0	0	0	1	0	0	0	0	0	0	0	0	0	0	0	0
8	13	89273.7	89359.6	85.92	18.6785	MMP16;RP11-586K2.1;	1	1	1	0	1	0	0	0	0	1	0	0	0	0	0	0	0	0	1	0
14	1	44005.7	44015.7	9.993	18.6592	KRT8P2;	2	0	2	0	0	0	0	0	1	1	0	0	0	0	0	0	0	0	0	0
7	4	44424.2	44510	85.813	18.5988	NUDCD3;	2	0	2	0	0	1	0	1	0	0	0	0	0	0	0	0	0	0	0	0
9	3	77558.3	77588	29.734	18.5843	C9orf40;C9orf41-AS1;	0	0	0	0	0	0	0	0	0	0	0	0	0	0	0	0	0	0	0	0
2	37	198599	198637	38.848	18.4997	BOLL;	0	0	0	0	0	0	0	0	0	0	0	0	0	0	0	0	0	0	0	0
8	16	104188	104271	82.976	18.4645	BAALC;BAALC-AS1;	0	0	0	0	0	0	0	0	0	0	0	0	0	0	0	0	0	0	0	0
19	2	28845.6	28920.6	75.075	18.4572	AC005780.1;AC093074.1;AC005307.1;	0	0	0	0	0	0	0	0	0	0	0	0	0	0	0	0	0	0	0	0
7	2	35149.7	35227.2	77.557	18.4487	DPY19L2P1;S100A11P2;	3	0	3	0	0	0	0	1	1	1	0	0	0	0	0	0	0	0	0	0
1	22	197219	197227	8.234	18.4468	CRB1;	0	4	0	0	4	0	0	0	0	0	0	0	0	0	0	1	1	1	0	1
8	21	118400	118431	31.391	18.4296		3	0	3	0	0	0	0	1	1	1	0	0	0	0	0	0	0	0	0	0
1	15	149868	149882	13.566	18.3682	BOLA1;SV2A;	0	0	0	0	0	0	0	0	0	0	0	0	0	0	0	0	0	0	0	0
4	2	13369.3	13442.5	73.2	18.3325	RAB28;	4	0	4	0	0	1	0	1	1	1	0	0	0	0	0	0	0	0	0	0
13	9	81969.7	81987.1	17.349	18.3236		0	0	0	0	0	0	0	0	0	0	0	0	0	0	0	0	0	0	0	0
11	4	38574.9	38574.9	0	18.2889		3	0	3	0	0	1	0	0	1	1	0	0	0	0	0	0	0	0	0	0
7	18	128662	128700	37.462	18.2725	TNPO3;	2	0	2	0	0	1	0	0	0	1	0	0	0	0	0	0	0	0	0	0
8	9	72474.5	72508.6	34.064	18.2549	RP11-1102P16.1;	3	0	3	0	0	1	0	1	1	0	0	0	0	0	0	0	0	0	0	0
4	27	177344	177398	54.082	18.2532		1	0	1	0	0	1	0	0	0	0	0	0	0	0	0	0	0	0	0	0
12	14	109478	110004	525.753	18.2308	USP30;UBE3B;MMAB;	0	4	0	2	2	0	0	0	0	0	0	1	0	1	0	0	1	1	0	0
2	0	32880	32939.5	59.497	18.222	TTC27;	0	0	0	0	0	0	0	0	0	0	0	0	0	0	0	0	0	0	0	0
20	2	32588.8	32723.7	134.879	18.1871	RALY;EIF2S2;RPS2P1;	0	0	0	0	0	0	0	0	0	0	0	0	0	0	0	0	0	0	0	0
10	2	62808.1	62835.6	27.49	18.1338		0	0	0	0	0	0	0	0	0	0	0	0	0	0	0	0	0	0	0	0
3	2	33669.3	33721.5	52.202	18.1313	CLASP2;	1	0	1	0	0	0	0	1	0	0	0	0	0	0	0	0	0	0	0	0
12	9	82912.6	83105.9	193.352	18.1185	RP11-263K4.3;TMTC2;	4	0	4	0	0	1	0	1	1	1	0	0	0	0	0	0	0	0	0	0
12	11	87468.7	87506.9	38.24	18.0748		4	0	4	0	0	1	0	1	1	1	0	0	0	0	0	0	0	0	0	0
2	11	99032.5	99114.9	82.469	18.053	INPP4A;	2	0	2	0	0	1	0	0	0	1	0	0	0	0	0	0	0	0	0	0
7	13	94107.4	94323.2	215.829	18.0527	RNU6-1328P;CASD1;SGCE;PEG10;RPS3AP25;	2	0	2	0	0	0	0	0	1	1	0	0	0	0	0	0	0	0	0	0
2	36	196260	196278	17.975	18.0451		0	0	0	0	0	0	0	0	0	0	0	0	0	0	0	0	0	0	0	0
3	18	145237	145275	38.121	17.9638	LARP7P4;	0	0	0	0	0	0	0	0	0	0	0	0	0	0	0	0	0	0	0	0
2	40	214362	214418	55.798	17.9407	SPAG16;	2	0	2	0	0	0	0	1	1	0	0	0	0	0	0	0	0	0	0	0
19	6	48044.2	48063.7	19.418	17.9249	ZNF541;	0	0	0	0	0	0	0	0	0	0	0	0	0	0	0	0	0	0	0	0
1	0	3825.35	3838.43	13.076	17.9245	LINC01134;	0	0	0	0	0	0	0	0	0	0	0	0	0	0	0	0	0	0	0	0
16	8	49584.6	49665.2	80.545	17.8757	ZNF423;	0	0	0	0	0	0	0	0	0	0	0	0	0	0	0	0	0	0	0	0
17	0	3508.73	3569.91	61.182	17.875	RP11-235E17.2;SHPK;CTNS;TAX1BP3;	3	0	3	0	0	1	0	0	1	1	0	0	0	0	0	0	0	0	0	0
5	21	151768	151789	20.708	17.869	NMUR2;	0	0	0	0	0	0	0	0	0	0	0	0	0	0	0	0	0	0	0	0
11	12	63909.2	63930.5	21.239	17.8212	MACROD1;	0	0	0	0	0	0	0	0	0	0	0	0	0	0	0	0	0	0	0	0
2	22	152094	152164	69.322	17.8067	RBM43;	2	0	2	0	0	0	0	0	1	1	0	0	0	0	0	0	0	0	0	0
1	3	33499.4	33513.9	14.477	17.8038	AK2;	1	0	1	0	0	0	0	0	1	0	0	0	0	0	0	0	0	0	0	0
9	4	84565.8	84581.3	15.505	17.8031	RP11-383M4.6;	0	0	0	0	0	0	0	0	0	0	0	0	0	0	0	0	0	0	0	0
1	1	4704.95	4752.28	47.323	17.7629	AJAP1;	0	0	0	0	0	0	0	0	0	0	0	0	0	0	0	0	0	0	0	0
1	17	161768	161792	24.601	17.762	ATF6;	2	0	2	0	0	1	0	0	0	1	0	0	0	0	0	0	0	0	0	0
12	16	119504	119593	89.138	17.7448	SRRM4;	0	0	0	0	0	0	0	0	0	0	0	0	0	0	0	0	0	0	0	0
8	22	122033	122080	47.053	17.7398	RP11-369K17.1;	4	0	4	0	0	1	0	1	1	1	0	0	0	0	0	0	0	0	0	0
5	20	143588	143621	33.334	17.7373	KCTD16;	0	0	0	0	0	0	0	0	0	0	0	0	0	0	0	0	0	0	0	0
2	9	84250	84304.8	54.791	17.724	AC016908.1;ST6GALNAC2P1;	2	0	2	0	0	0	0	0	1	1	0	0	0	0	0	0	0	0	0	0
12	4	70508.3	70582.8	74.492	17.7124	LINC01481;RP11-320P7.2;	2	1	2	1	0	1	0	1	0	0	0	0	0	0	1	0	0	0	0	0
4	26	158288	158288	0	17.7112		2	1	2	1	0	0	0	0	1	1	0	1	0	0	0	0	0	0	0	0
3	15	125006	125077	71.253	17.7057	ZNF148;	0	0	0	0	0	0	0	0	0	0	0	0	0	0	0	0	0	0	0	0
20	7	40870.8	40947.7	76.938	17.6979	PTPRT;	0	0	0	0	0	0	0	0	0	0	0	0	0	0	0	0	0	0	0	0
8	18	112053	112054	0.182	17.6877		3	0	3	0	0	1	0	0	1	1	0	0	0	0	0	0	0	0	0	0
4	11	56832.7	57275.1	442.408	17.6788	CEP135;AASDH;PPAT;	1	2	1	0	2	0	0	0	1	0	0	0	0	0	0	1	0	0	0	1
7	16	114684	114742	57.598	17.6662	LINC01392;LINC01393;	1	0	1	0	0	0	0	1	0	0	0	0	0	0	0	0	0	0	0	0
5	8	56686.4	56737.4	51.007	17.6373	CTD-2023N9.1;SALL4P1;	1	0	1	0	0	0	0	1	0	0	0	0	0	0	0	0	0	0	0	0
10	6	91339	91390.8	51.848	17.6327	PANK1;	4	0	4	0	0	1	0	1	1	1	0	0	0	0	0	0	0	0	0	0
10	7	97830.7	97854	23.261	17.6022	ENTPD1-AS1;	0	1	0	0	1	0	0	0	0	0	0	0	0	0	0	1	0	0	0	0
1	27	226352	226411	58.451	17.602	ACBD3;RP11-275I14.2;MIXL1;	1	0	1	0	0	0	0	0	1	0	0	0	0	0	0	0	0	0	0	0
6	1	34828.6	34938.8	110.256	17.5876	UHRF1BP1;TAF11;ANKS1A;	1	3	1	3	0	0	0	0	1	0	1	0	1	0	1	0	0	0	0	0
16	5	27539.5	27588.2	48.702	17.5815	GTF3C1;KIAA0556;	1	0	1	0	0	0	0	1	0	0	0	0	0	0	0	0	0	0	0	0
2	3	55796.4	55847.4	51.014	17.5618		3	2	3	2	0	1	0	0	1	1	0	0	0	1	1	0	0	0	0	0
2	20	148034	148034	0	17.5378		1	0	1	0	0	0	0	0	1	0	0	0	0	0	0	0	0	0	0	0
7	15	114082	114097	14.352	17.528	FOXP2;	0	0	0	0	0	0	0	0	0	0	0	0	0	0	0	0	0	0	0	0
10	3	64988.9	65027.6	38.679	17.5157	JMJD1C;	0	0	0	0	0	0	0	0	0	0	0	0	0	0	0	0	0	0	0	0
15	2	57300.2	57383.2	82.985	17.4925	TCF12;	1	0	1	0	0	0	0	1	0	0	0	0	0	0	0	0	0	0	0	0
2	8	80504.6	80532.1	27.585	17.491	CTNNA2;LRRTM1;	0	0	0	0	0	0	0	0	0	0	0	0	0	0	0	0	0	0	0	0
10	0	32793.4	33253.9	460.449	17.4689	CCDC7;ITGB1;RP11-462L8.1;	1	7	1	2	5	0	0	0	1	0	0	1	1	0	0	1	1	1	1	1
8	5	53130.8	53192.7	61.934	17.4542	ST18;	0	0	0	0	0	0	0	0	0	0	0	0	0	0	0	0	0	0	0	0
8	12	85551.6	85595.1	43.438	17.4193	RALYL;	0	0	0	0	0	0	0	0	0	0	0	0	0	0	0	0	0	0	0	0
1	9	86077.9	86122.4	44.531	17.4172	ZNHIT6;	0	0	0	0	0	0	0	0	0	0	0	0	0	0	0	0	0	0	0	0
4	7	45665.1	45665.1	0.023	17.404		1	0	1	0	0	0	0	1	0	0	0	0	0	0	0	0	0	0	0	0
6	18	127046	127046	0	17.3868		3	0	3	0	0	0	0	1	1	1	0	0	0	0	0	0	0	0	0	0
3	3	34461.3	34607.8	146.489	17.3625	AC018359.1;	1	0	1	0	0	0	0	0	1	0	0	0	0	0	0	0	0	0	0	0
18	1	26337.8	26369	31.241	17.34	RP11-510D21.1;	0	0	0	0	0	0	0	0	0	0	0	0	0	0	0	0	0	0	0	0
14	0	41420.8	41485.7	64.877	17.3232	RP11-129M6.1;	0	0	0	0	0	0	0	0	0	0	0	0	0	0	0	0	0	0	0	0
6	19	132985	133002	17.409	17.3174	HLFP1;VNN1;	0	0	0	0	0	0	0	0	0	0	0	0	0	0	0	0	0	0	0	0
3	11	85942.1	85953	10.86	17.2677	CADM2;	0	0	0	0	0	0	0	0	0	0	0	0	0	0	0	0	0	0	0	0
2	5	63487.9	63502.2	14.22	17.2586	WDPCP;	0	0	0	0	0	0	0	0	0	0	0	0	0	0	0	0	0	0	0	0
5	19	138573	138669	96.383	17.2481	SIL1;SNORA74;SNORA74A;MATR3;	1	0	1	0	0	0	0	0	1	0	0	0	0	0	0	0	0	0	0	0
8	17	109262	109308	45.381	17.2361	EIF3E;	1	0	1	0	0	0	0	0	1	0	0	0	0	0	0	0	0	0	0	0
5	15	109066	109093	27.094	17.2353	MAN2A1;	0	0	0	0	0	0	0	0	0	0	0	0	0	0	0	0	0	0	0	0
2	1	39596.4	39645.7	49.214	17.1769	MAP4K3;	0	0	0	0	0	0	0	0	0	0	0	0	0	0	0	0	0	0	0	0
10	5	77326	77326	0	17.1724		0	0	0	0	0	0	0	0	0	0	0	0	0	0	0	0	0	0	0	0
4	13	74380.7	74399.5	18.801	17.1504	RP11-622A1.2;	2	0	2	0	0	1	0	0	0	1	0	0	0	0	0	0	0	0	0	0
14	10	104453	104502	48.732	17.1445	TDRD9;	4	0	4	0	0	1	0	1	1	1	0	0	0	0	0	0	0	0	0	0
5	4	50011.7	50064.4	52.692	17.1286	PARP8;	1	0	1	0	0	0	0	0	1	0	0	0	0	0	0	0	0	0	0	0
7	8	74068.1	74140.9	72.778	17.1267		3	5	3	0	5	1	0	0	1	1	0	0	0	0	0	1	1	1	1	1
19	1	24280.3	24306.8	26.512	17.1052	ZNF254;	0	0	0	0	0	0	0	0	0	0	0	0	0	0	0	0	0	0	0	0
17	4	45384.4	45402.2	17.798	17.0945	ITGB3;RP11-290H9.2;EFCAB13;	0	0	0	0	0	0	0	0	0	0	0	0	0	0	0	0	0	0	0	0
7	12	92125.4	92169.9	44.426	17.0788	PEX1;RBM48;	3	0	3	0	0	1	0	1	0	1	0	0	0	0	0	0	0	0	0	0
14	2	50958.4	51034.3	75.9	17.0698	MAP4K5;ATL1;	0	0	0	0	0	0	0	0	0	0	0	0	0	0	0	0	0	0	0	0
2	21	150573	150628	55.503	17.0578	AC144449.1;AC007364.1;	3	0	3	0	0	0	0	1	1	1	0	0	0	0	0	0	0	0	0	0
12	5	76787.6	76833.6	45.974	17.0345	OSBPL8;	4	0	4	0	0	1	0	1	1	1	0	0	0	0	0	0	0	0	0	0
7	10	84249.2	84277.3	28.156	16.9471		2	0	2	0	0	0	0	0	1	1	0	0	0	0	0	0	0	0	0	0
18	2	30766.9	30820.8	53.955	16.9233	CCDC178;	0	1	0	1	0	0	0	0	0	0	0	1	0	0	0	0	0	0	0	0
4	12	72231.9	72239.4	7.44	16.901	SLC4A4;	2	0	2	0	0	1	0	1	0	0	0	0	0	0	0	0	0	0	0	0
15	3	66654.5	66684.4	29.916	16.8843	TIPIN;RPL9P25;MAP2K1;	0	0	0	0	0	0	0	0	0	0	0	0	0	0	0	0	0	0	0	0
13	10	83314.3	83322.2	7.985	16.8763		0	0	0	0	0	0	0	0	0	0	0	0	0	0	0	0	0	0	0	0
16	3	15760	15791.9	31.872	16.8681	NDE1;	2	0	2	0	0	0	0	0	1	1	0	0	0	0	0	0	0	0	0	0
4	3	14992.5	15013.4	20.865	16.8647	CPEB2-AS1;	1	0	1	0	0	0	0	0	1	0	0	0	0	0	0	0	0	0	0	0
11	16	91247.1	91247.3	0.129	16.8537		0	0	0	0	0	0	0	0	0	0	0	0	0	0	0	0	0	0	0	0
1	10	87057	87089.5	32.458	16.852	RP4-651E10.4;	1	0	1	0	0	0	0	0	1	0	0	0	0	0	0	0	0	0	0	0
10	1	60692.4	60727.3	34.889	16.8468		0	0	0	0	0	0	0	0	0	0	0	0	0	0	0	0	0	0	0	0
11	6	47753.4	47777.9	24.55	16.8328	FNBP4;	1	0	1	0	0	1	0	0	0	0	0	0	0	0	0	0	0	0	0	0
19	5	42353.8	42517.5	163.75	16.8308	RPS19;GRIK5;	0	0	0	0	0	0	0	0	0	0	0	0	0	0	0	0	0	0	0	0
2	15	126863	126871	8.246	16.83	AC114813.1;	0	0	0	0	0	0	0	0	0	0	0	0	0	0	0	0	0	0	0	0
6	13	110437	110477	39.819	16.8024	WASF1;	0	3	0	3	0	0	0	0	0	0	1	1	0	1	0	0	0	0	0	0
7	3	38792.2	38838.9	46.722	16.7987	VPS41;	1	0	1	0	0	0	0	0	1	0	0	0	0	0	0	0	0	0	0	0
12	13	98417.1	98417.1	0	16.7785		1	0	1	0	0	1	0	0	0	0	0	0	0	0	0	0	0	0	0	0
6	4	68945.1	68988.5	43.4	16.7624	RP11-406O16.1;	0	2	0	0	2	0	0	0	0	0	0	0	0	0	0	1	0	1	0	0
15	4	76220.5	76280.8	60.291	16.7599	FBXO22;NRG4;	0	0	0	0	0	0	0	0	0	0	0	0	0	0	0	0	0	0	0	0
11	7	51436.9	51440.6	3.676	16.7532	OR4A8;	1	0	1	0	0	0	0	0	1	0	0	0	0	0	0	0	0	0	0	0
2	7	78760.4	78827.1	66.741	16.7384	AC092660.1;	0	0	0	0	0	0	0	0	0	0	0	0	0	0	0	0	0	0	0	0
7	14	95851.8	95889.7	37.978	16.7155	SLC25A13;	0	0	0	0	0	0	0	0	0	0	0	0	0	0	0	0	0	0	0	0
14	7	81320.8	81347.5	26.704	16.7133	CEP128;	3	2	3	0	2	1	0	0	1	1	0	0	0	0	0	0	1	0	1	0
14	6	62609.1	62654.3	45.168	16.7033	LINC00644;RP11-355I22.8;	0	0	0	0	0	0	0	0	0	0	0	0	0	0	0	0	0	0	0	0
8	0	36119	36170.3	51.235	16.7011	MTCYBP19;MTND5P41;RP11-139F9.1;RNU6-533P;	0	0	0	0	0	0	0	0	0	0	0	0	0	0	0	0	0	0	0	0
3	17	130642	130655	13.197	16.6853	ATP2C1;	0	0	0	0	0	0	0	0	0	0	0	0	0	0	0	0	0	0	0	0
11	2	16659.1	16686.7	27.652	16.6383	SOX6;	2	0	2	0	0	1	0	0	1	0	0	0	0	0	0	0	0	0	0	0
14	4	59387.7	59409.5	21.822	16.6313	LINC01500;	0	0	0	0	0	0	0	0	0	0	0	0	0	0	0	0	0	0	0	0
15	6	82569.7	82573.8	4.127	16.613	SAXO2;	2	0	2	0	0	1	0	0	1	0	0	0	0	0	0	0	0	0	0	0
11	5	43216.3	43511.4	295.141	16.598	HNRNPKP3;TTC17;	0	0	0	0	0	0	0	0	0	0	0	0	0	0	0	0	0	0	0	0
13	7	76277.5	76319.5	41.943	16.5978	RP11-29G8.3;	4	0	4	0	0	1	0	1	1	1	0	0	0	0	0	0	0	0	0	0
5	14	96932.7	96961.6	28.971	16.5615	LINC01340;	0	5	0	5	0	0	0	0	0	0	1	1	1	1	1	0	0	0	0	0
3	1	27472	27518.2	46.185	16.5522	SLC4A7;RPS20P15;	0	5	0	0	5	0	0	0	0	0	0	0	0	0	0	1	1	1	1	1
8	6	54882.8	54889.1	6.325	16.5467	TCEA1;	1	0	1	0	0	1	0	0	0	0	0	0	0	0	0	0	0	0	0	0
7	9	75489	75496.1	7.113	16.5385	RHBDD2;	0	0	0	0	0	0	0	0	0	0	0	0	0	0	0	0	0	0	0	0
2	4	61755.5	61803.5	47.997	16.5354	XPO1;RP11-355B11.1;	0	0	0	0	0	0	0	0	0	0	0	0	0	0	0	0	0	0	0	0
20	0	16746.7	16790.9	44.148	16.5314	OTOR;	0	0	0	0	0	0	0	0	0	0	0	0	0	0	0	0	0	0	0	0
11	8	56581.4	56624.9	43.496	16.5105	OR5G5P;OR5G3;AP000479.1;	0	0	0	0	0	0	0	0	0	0	0	0	0	0	0	0	0	0	0	0
5	10	84819.7	84823.9	4.162	16.5073		0	2	0	0	2	0	0	0	0	0	0	0	0	0	0	0	1	0	1	0
4	1	1871.64	1936.64	64.999	16.5043	WHSC1;	2	0	2	0	0	0	0	1	0	1	0	0	0	0	0	0	0	0	0	0
8	3	49186	49207.7	21.709	16.4897	CTD-2210A23.1;	3	1	3	1	0	1	0	1	0	1	0	1	0	0	0	0	0	0	0	0
4	6	41979.8	42048.1	68.246	16.466	DCAF4L1;SLC30A9;	0	7	0	4	3	0	0	0	0	0	1	1	1	0	1	0	0	1	1	1
6	15	115543	115562	19.973	16.465		2	0	2	0	0	0	0	0	1	1	0	0	0	0	0	0	0	0	0	0
5	1	28894.1	28898.7	4.64	16.4611	CTD-2269E23.3;	0	0	0	0	0	0	0	0	0	0	0	0	0	0	0	0	0	0	0	0
3	22	163081	163084	2.701	16.4351	LINC01192;	0	0	0	0	0	0	0	0	0	0	0	0	0	0	0	0	0	0	0	0
1	24	219020	219048	28.132	16.4247		0	0	0	0	0	0	0	0	0	0	0	0	0	0	0	0	0	0	0	0
2	12	99687.5	99687.8	0.357	16.413	TSGA10;	1	0	1	0	0	0	0	0	1	0	0	0	0	0	0	0	0	0	0	0
7	17	124029	124039	10.682	16.4128	RP5-921G16.1;	1	0	1	0	0	0	0	0	1	0	0	0	0	0	0	0	0	0	0	0
3	7	56654.1	56662.7	8.586	16.4098	CCDC66;FAM208A;	0	2	0	2	0	0	0	0	0	0	0	0	0	1	1	0	0	0	0	0
12	15	113658	113662	3.759	16.4094	TPCN1;	3	0	3	0	0	1	0	1	0	1	0	0	0	0	0	0	0	0	0	0
12	6	78820.8	78825.5	4.725	16.3814	RP11-90C1.1;	0	0	0	0	0	0	0	0	0	0	0	0	0	0	0	0	0	0	0	0
1	7	60288.7	60288.7	0	16.3606		2	4	2	0	4	0	0	0	1	1	0	0	0	0	0	1	1	1	0	1
6	6	72849.1	72853.8	4.639	16.3493	RIMS1;	3	0	3	0	0	1	0	1	0	1	0	0	0	0	0	0	0	0	0	0
19	7	49357.7	49389.4	31.748	16.3451	PLEKHA4;PPP1R15A;TULP2;	0	0	0	0	0	0	0	0	0	0	0	0	0	0	0	0	0	0	0	0
13	6	61052.7	61062.8	10.007	16.3371	TDRD3;	2	0	2	0	0	0	0	1	1	0	0	0	0	0	0	0	0	0	0	0
21	1	44238.5	44304.9	66.433	16.3286	WDR4;NDUFV3;	1	0	1	0	0	0	0	0	0	1	0	0	0	0	0	0	0	0	0	0
6	11	97208.4	97208.4	0	16.2926		0	0	0	0	0	0	0	0	0	0	0	0	0	0	0	0	0	0	0	0
3	20	147791	147799	8.025	16.2835	RP11-639B1.1;	1	0	1	0	0	0	0	0	0	1	0	0	0	0	0	0	0	0	0	0
2	16	134472	134476	4.12	16.2792		1	0	1	0	0	0	0	0	1	0	0	0	0	0	0	0	0	0	0	0
16	9	69278.4	69278.4	0	16.245		2	0	2	0	0	0	0	1	0	1	0	0	0	0	0	0	0	0	0	0
2	42	233398	233435	37.357	16.2409	CHRND;CHRNG;EIF4E2;	0	0	0	0	0	0	0	0	0	0	0	0	0	0	0	0	0	0	0	0
1	18	167333	167333	0	16.2237		1	0	1	0	0	0	0	0	0	1	0	0	0	0	0	0	0	0	0	0
2	29	176632	176632	0	16.2175		2	0	2	0	0	0	0	1	1	0	0	0	0	0	0	0	0	0	0	0
12	3	61412.5	61412.5	0	16.1803		0	0	0	0	0	0	0	0	0	0	0	0	0	0	0	0	0	0	0	0
18	3	41990.7	41995.8	5.15	16.1797	LINC01478;	2	0	2	0	0	0	0	1	1	0	0	0	0	0	0	0	0	0	0	0
2	27	173449	173465	16.718	16.1784	PDK1;	0	0	0	0	0	0	0	0	0	0	0	0	0	0	0	0	0	0	0	0
6	12	108955	108956	1.727	16.1644	FOXO3;	0	0	0	0	0	0	0	0	0	0	0	0	0	0	0	0	0	0	0	0
4	24	124845	124874	29.458	16.157	LINC01091;	0	0	0	0	0	0	0	0	0	0	0	0	0	0	0	0	0	0	0	0
17	3	34885.3	34900.8	15.452	16.1557		0	0	0	0	0	0	0	0	0	0	0	0	0	0	0	0	0	0	0	0
13	1	45798	45800.6	2.624	16.1491	GTF2F2;	0	0	0	0	0	0	0	0	0	0	0	0	0	0	0	0	0	0	0	0
2	2	50371.1	50375.7	4.626	16.1395	NRXN1;	1	1	1	0	1	0	0	0	1	0	0	0	0	0	0	0	0	0	1	0
8	8	67526.3	67540.5	14.228	16.1164	MYBL1;VCPIP1;	1	0	1	0	0	0	0	0	0	1	0	0	0	0	0	0	0	0	0	0
3	10	76270.1	76275	4.916	16.0432	ROBO2;	0	0	0	0	0	0	0	0	0	0	0	0	0	0	0	0	0	0	0	0
6	21	169896	169896	0	16.0286		0	0	0	0	0	0	0	0	0	0	0	0	0	0	0	0	0	0	0	0
8	11	80458.2	80458.2	0	16.0103		1	0	1	0	0	1	0	0	0	0	0	0	0	0	0	0	0	0	0	0
5	16	118728	118728	0.127	15.9858	TNFAIP8;	0	0	0	0	0	0	0	0	0	0	0	0	0	0	0	0	0	0	0	0
3	5	47999	48016.2	17.206	15.9848	MAP4;	3	0	3	0	0	1	0	1	0	1	0	0	0	0	0	0	0	0	0	0
5	6	54345.9	54346.2	0.219	15.9421	CTD-2313F11.2;	0	0	0	0	0	0	0	0	0	0	0	0	0	0	0	0	0	0	0	0

## Sheet: AFR-LWK
Chrsme	Block	Begin	End	Size (Kb)	max CSS	Genes	wth_sharing	btw_sharing	AFR_sharing	EUR_sharing	ASI_sharing	Share_ESN	Share_GWD	Share_LWK	Share_MSL	Share_YRI	Share_CEU	Share_FIN	Share_GBR	Share_IBS	Share_TSI	Share_CDX	Share_CHB	Share_CHS	Share_JPT	Share_KHV
4	9	52871.9	53622.5	750.577	46.7399	LRRC66;SGCB;SPATA18;USP46;USP46-AS1;RP11-177B4.2;DANCR;ERVMER34-1;	4	0	4	0	0	1	1	0	1	1	0	0	0	0	0	0	0	0	0	0
1	29	225432	225790	357.465	38.2688	DNAH14;LBR;RP11-496N12.6;ENAH;	4	0	4	0	0	1	1	0	1	1	0	0	0	0	0	0	0	0	0	0
21	0	30678.1	30832.1	154.002	38.1425	BACH1;BACH1-IT1;BACH1-IT2;	3	0	3	0	0	1	1	0	0	1	0	0	0	0	0	0	0	0	0	0
2	19	200616	200750	133.198	34.425	FTCDNL1;AC108032.1;AC073043.1;	3	0	3	0	0	0	1	0	1	1	0	0	0	0	0	0	0	0	0	0
12	14	87468.7	87834.2	365.579	34.0445	RPL23AP68;	4	0	4	0	0	1	1	0	1	1	0	0	0	0	0	0	0	0	0	0
10	9	104564	104939	375.665	34.0398	WBP1L;CYP17A1;PFN1P11;BORCS7;AS3MT;RP11-724N1.1;CNNM2;NT5C2;	4	0	4	0	0	1	1	0	1	1	0	0	0	0	0	0	0	0	0	0
4	13	87417.3	87720	302.746	33.4483	MAPK10;MIR4452;PTPN13;	3	0	3	0	0	1	1	0	0	1	0	0	0	0	0	0	0	0	0	0
4	16	107755	107790	35.213	32.7765	ACTR6P1;	4	0	4	0	0	1	1	0	1	1	0	0	0	0	0	0	0	0	0	0
9	5	100549	100721	172.084	32.757	PTCSC2;FOXE1;TRMO;HEMGN;	4	0	4	0	0	1	1	0	1	1	0	0	0	0	0	0	0	0	0	0
9	9	116194	116317	123.216	31.6725	RGS3;	3	0	3	0	0	1	0	0	1	1	0	0	0	0	0	0	0	0	0	0
1	28	223277	223386	109.529	30.9902	TLR5;RP11-239E10.2;RP11-239E10.3;	4	0	4	0	0	1	1	0	1	1	0	0	0	0	0	0	0	0	0	0
12	9	79556	80004.3	448.314	29.6416	SYT1;RP11-359M6.2;RP1-78O14.1;RP11-359M6.1;NOP56P3;PAWR;	4	0	4	0	0	1	1	0	1	1	0	0	0	0	0	0	0	0	0	0
11	13	110435	111019	583.647	29.3529	ARHGAP20;HNRNPA1P60;RP11-97I14.1;RP11-89C3.4;RP11-89C3.2;RPS17P15;	4	0	4	0	0	1	1	0	1	1	0	0	0	0	0	0	0	0	0	0
2	18	193151	194993	1841.76	29.3202	PCGEM1;AC092638.1;AC092638.2;AC074290.1;AC068135.1;GLULP6;	4	0	4	0	0	1	1	0	1	1	0	0	0	0	0	0	0	0	0	0
11	10	94536.5	94675.4	138.945	29.0907	AMOTL1;RP11-856F16.2;	2	0	2	0	0	1	0	0	1	0	0	0	0	0	0	0	0	0	0	0
6	0	32399.8	33145.4	745.536	28.5745	HLA-DRA;HLA-DRB9;HLA-DRB5;RNU1-61P;HLA-DRB6;HLA-DRB1;HLA-DQA1;HLA-DQB1;HLA-DPA3;HCG24;COL11A2;	4	2	4	2	0	1	1	0	1	1	1	1	0	0	0	0	0	0	0	0
4	4	19442.6	19584.1	141.453	28.491	RP11-3J1.1;RP11-608O21.1;	4	0	4	0	0	1	1	0	1	1	0	0	0	0	0	0	0	0	0	0
12	13	86503.3	86943.6	440.338	28.4651	MGAT4C;	3	0	3	0	0	1	1	0	1	0	0	0	0	0	0	0	0	0	0	0
4	27	148079	148261	181.479	28.3848	MIR548G;	2	0	2	0	0	1	0	0	0	1	0	0	0	0	0	0	0	0	0	0
6	10	111693	111847	154.527	28.346	REV3L;TRAF3IP2-AS1;RP3-415N12.1;	3	0	3	0	0	1	1	0	1	0	0	0	0	0	0	0	0	0	0	0
16	7	69240.5	69934.7	694.163	28.1221	SNTB2;NFAT5;NOB1;WWP2;	4	0	4	0	0	1	1	0	1	1	0	0	0	0	0	0	0	0	0	0
16	5	47960.2	48440.6	480.462	27.9652	RP11-523L20.1;ABCC11;LONP2;SIAH1;	4	0	4	0	0	1	1	0	1	1	0	0	0	0	0	0	0	0	0	0
1	13	101304	101518	214.142	27.9388	EXTL2;SLC30A7;DPH5;RP11-421L21.3;	4	0	4	0	0	1	1	0	1	1	0	0	0	0	0	0	0	0	0	0
16	0	14586.8	14777.8	190.952	27.7934	PARN;BFAR;PLA2G10;	4	0	4	0	0	1	1	0	1	1	0	0	0	0	0	0	0	0	0	0
3	18	180810	181017	206.958	27.5009	SOX2-OT;RP11-262M14.2;RNU6-4P;FAUP2;	0	0	0	0	0	0	0	0	0	0	0	0	0	0	0	0	0	0	0	0
5	5	52573.3	53027	453.694	27.4188	NDUFS4;	3	2	3	2	0	0	1	0	1	1	0	0	0	1	1	0	0	0	0	0
4	21	129913	130067	154.21	27.3954	SCLT1;C4orf33;RP11-392L5.2;ZSWIM5P3;	4	0	4	0	0	1	1	0	1	1	0	0	0	0	0	0	0	0	0	0
14	4	60315.1	61479.2	1164.05	27.0455	RTN1;LRRC9;DHRS7;PSMA3P;RPL17P2;CTD-2184C24.2;PPM1A;CTD-2568P8.1;C14orf39;RBM8B;GNRHR2P1;SALL4P7;SIX6;RP11-1042B17.3;RP11-1042B17.1;RP11-1042B17.2;SALRNA1;SIX1;SIX4;MNAT1;TRMT5;SLC38A6;	4	1	4	0	1	1	1	0	1	1	0	0	0	0	0	0	0	0	0	1
19	5	37906.5	39197.6	1291.08	26.9274	ZNF569;CTD-2554C21.2;AC016582.2;WDR87;PPP1R14A;SPINT2;CTB-102L5.4;C19orf33;YIF1B;KCNK6;CATSPERG;PSMD8;GGN;SPRED3;FAM98C;RASGRP4;RYR1;MAP4K1;EIF3K;ACTN4;	4	5	4	0	5	1	1	0	1	1	0	0	0	0	0	1	1	1	1	1
13	4	54694.6	54785	90.402	26.9138	LINC00458;	3	0	3	0	0	1	1	0	1	0	0	0	0	0	0	0	0	0	0	0
6	3	69962.8	70658.6	695.728	26.7147	ADGRB3;LMBRD1;COL19A1;	3	2	3	0	2	1	1	0	0	1	0	0	0	0	0	1	0	0	1	0
8	3	37520.1	38713.1	1192.97	26.6327	RP11-346L1.2;ZNF703;RP11-863K10.2;RPL12P48;EIF4EBP1;BAG4;DDHD2;PLPP5;WHSC1L1;LETM2;FGFR1;TACC1;	4	0	4	0	0	1	1	0	1	1	0	0	0	0	0	0	0	0	0	0
18	0	7962.08	8085.05	122.963	26.629	PTPRM;	3	0	3	0	0	1	0	0	1	1	0	0	0	0	0	0	0	0	0	0
7	6	45549.2	45707.4	158.198	26.5749	AC073325.1;ADCY1;	3	0	3	0	0	1	1	0	0	1	0	0	0	0	0	0	0	0	0	0
10	0	38262.2	38438.9	176.743	26.5744	ZNF25;RP11-393J16.4;Y_RNA;ZNF33A;EIF3LP3;FXYD6P2;ZNF37A;RP11-508N22.12;	2	0	2	0	0	1	0	0	0	1	0	0	0	0	0	0	0	0	0	0
1	16	113897	114427	529.952	26.3176	MAGI3;RSBN1;PTPN22;BCL2L15;	4	0	4	0	0	1	1	0	1	1	0	0	0	0	0	0	0	0	0	0
15	5	73449	73836	386.955	26.2759	NEO1;REC114;	2	3	2	1	2	0	0	0	1	1	0	0	0	0	1	0	0	1	1	0
13	2	48600	48731	130.974	26.2333	SUCLA2;NUDT15;MED4;POLR2KP2;	4	0	4	0	0	1	1	0	1	1	0	0	0	0	0	0	0	0	0	0
15	2	44647.4	44774.4	127.045	26.2246	CASC4;CTDSPL2;	4	0	4	0	0	1	1	0	1	1	0	0	0	0	0	0	0	0	0	0
8	10	67884.9	68048.5	163.61	26.2152	PPP1R42;RP11-409C19.2;COPS5;CSPP1;	0	0	0	0	0	0	0	0	0	0	0	0	0	0	0	0	0	0	0	0
5	3	43433.1	43889.2	456.064	26.1918	TMEM267;C5orf34;PAIP1;NNT-AS1;RP11-8L21.1;	4	6	4	2	4	1	1	0	1	1	0	1	0	1	0	1	1	1	0	1
16	4	34216.6	34741.3	524.642	25.8643	CTD-2144E22.8;CTD-2144E22.5;CCNYL3;NAMPTP3;VPS35P1;VN1R68P;UBE2MP1;SLC25A1P4;RP11-244B22.7;RP11-488I20.9;RP11-488I20.8;RARRES2P5;FGFR3P5;AGGF1P8;TP53TG3HP;	3	0	3	0	0	0	1	0	1	1	0	0	0	0	0	0	0	0	0	0
5	9	72262.5	72400.2	137.708	25.6788	FCHO2;	4	0	4	0	0	1	1	0	1	1	0	0	0	0	0	0	0	0	0	0
13	3	52641.9	52734.9	92.962	25.6697	NEK5;NEK3;	4	0	4	0	0	1	1	0	1	1	0	0	0	0	0	0	0	0	0	0
11	1	16082.3	16200.9	118.543	25.651	SOX6;	3	0	3	0	0	0	1	0	1	1	0	0	0	0	0	0	0	0	0	0
14	3	55610	55679.7	69.716	25.1321	LGALS3;DLGAP5;RP11-698F20.3;	3	0	3	0	0	1	1	0	1	0	0	0	0	0	0	0	0	0	0	0
7	10	69056	69887.6	831.674	25.0613	RP5-942I16.1;AUTS2;	4	1	4	1	0	1	1	0	1	1	0	0	0	1	0	0	0	0	0	0
12	11	82783.4	83118.6	335.256	25.0016	METTL25;RP11-263K4.5;RP11-263K4.4;RP11-263K4.3;TMTC2;	4	2	4	2	0	1	1	0	1	1	0	1	0	1	0	0	0	0	0	0
9	4	95302.4	95553.5	251.068	24.8463	CENPP;IPPK;RP11-476B13.2;BICD2;	3	0	3	0	0	1	1	0	1	0	0	0	0	0	0	0	0	0	0	0
3	17	178317	179143	825.934	24.6565	KCNMB2;ZNF639;RP11-255C15.3;MFN1;GNB4;	2	0	2	0	0	0	0	0	1	1	0	0	0	0	0	0	0	0	0	0
3	4	47131.6	48358.3	1226.66	24.4904	SETD2;KIF9-AS1;KLHL18;RP11-708J19.1;PTPN23;CSPG5;SMARCC1;MAP4;CAMP;ZNF589;Y_RNA;NME6;SPINK8;	4	0	4	0	0	1	1	0	1	1	0	0	0	0	0	0	0	0	0	0
11	6	62437.6	62545.3	107.699	24.4628	UQCC3;LBHD1;UBXN1;LRRN4CL;BSCL2;HNRNPUL2;TTC9C;ZBTB3;POLR2G;TAF6L;	2	0	2	0	0	1	1	0	0	0	0	0	0	0	0	0	0	0	0	0
20	0	21319	21416.7	97.702	24.3077	XRN2;NKX2-4;RN7SKP140;	0	1	0	1	0	0	0	0	0	0	0	0	0	0	1	0	0	0	0	0
5	12	87829.4	87909.5	80.085	23.9392	LINC00461;CTC-470C15.1;	4	0	4	0	0	1	1	0	1	1	0	0	0	0	0	0	0	0	0	0
14	8	84275.1	84496.3	221.236	23.7664	RP11-22K10.1;RP11-353P15.1;	2	0	2	0	0	0	0	0	1	1	0	0	0	0	0	0	0	0	0	0
2	12	163934	164045	110.626	23.6891	RPL7P61;	0	0	0	0	0	0	0	0	0	0	0	0	0	0	0	0	0	0	0	0
12	17	133022	133119	96.863	23.6252	RP11-503G7.1;RP11-503G7.2;FBRSL1;	0	0	0	0	0	0	0	0	0	0	0	0	0	0	0	0	0	0	0	0
13	8	88888.8	89245	356.238	23.5435	RPL29P29;LINC00433;	2	0	2	0	0	0	1	0	0	1	0	0	0	0	0	0	0	0	0	0
19	3	34824	35181.4	357.475	23.5386	KIAA0355;GPI;RP11-618P17.4;PDCD2L;UBA2;SCGB2B2;ZNF302;	4	0	4	0	0	1	1	0	1	1	0	0	0	0	0	0	0	0	0	0
16	1	22943.8	23168.6	224.854	23.4631	RP11-20G6.2;USP31;	4	0	4	0	0	1	1	0	1	1	0	0	0	0	0	0	0	0	0	0
2	6	144381	145090	709.118	23.4131	ARHGAP15;GTDC1;	4	0	4	0	0	1	1	0	1	1	0	0	0	0	0	0	0	0	0	0
1	21	160974	161168	194.311	23.3845	F11R;RP11-544M22.13;TSTD1;USF1;ARHGAP30;NECTIN4;KLHDC9;PFDN2;DEDD;ACA64;UFC1;PPOX;B4GALT3;ADAMTS4;	4	0	4	0	0	1	1	0	1	1	0	0	0	0	0	0	0	0	0	0
6	8	87394.9	87748.7	353.817	23.3454	RP1-253B10.1;HTR1E;	4	0	4	0	0	1	1	0	1	1	0	0	0	0	0	0	0	0	0	0
1	1	27551.3	27610.7	59.48	23.2863	WDTC1;	0	0	0	0	0	0	0	0	0	0	0	0	0	0	0	0	0	0	0	0
4	15	106868	106967	98.286	23.2837	NPNT;RP11-710F7.3;TBCK;	3	0	3	0	0	0	1	0	1	1	0	0	0	0	0	0	0	0	0	0
3	5	50625.5	50798.9	173.381	23.1696	CISH;MAPKAPK3;RP11-804H8.6;DOCK3;	4	0	4	0	0	1	1	0	1	1	0	0	0	0	0	0	0	0	0	0
5	6	55009.1	55105.2	96.139	23.0904	SLC38A9;DDX4;	3	0	3	0	0	0	1	0	1	1	0	0	0	0	0	0	0	0	0	0
7	12	92096.3	92423.9	327.591	23.0315	ERVW-1;AC007566.10;PEX1;RBM48;FAM133B;CDK6;	3	0	3	0	0	1	1	0	0	1	0	0	0	0	0	0	0	0	0	0
16	3	28147.7	28248.4	100.658	22.8035	XPO6;RP11-159J3.1;	1	0	1	0	0	1	0	0	0	0	0	0	0	0	0	0	0	0	0	0
12	16	113613	113900	287.015	22.7957	DDX54;RITA1;IQCD;TPCN1;PLBD2;SDS;SDSL;LHX5;	3	1	3	0	1	1	1	0	0	1	0	0	0	0	0	0	0	0	0	1
3	1	25652.1	25732.3	80.203	22.7819	TOP2B;CRIP1P2;	1	1	1	0	1	0	0	0	0	1	0	0	0	0	0	0	0	0	1	0
5	15	145484	145662	178.141	22.5863	PLAC8L1;LARS;RBM27;	0	0	0	0	0	0	0	0	0	0	0	0	0	0	0	0	0	0	0	0
1	25	210222	210321	99.419	22.5412	SYT14;	0	0	0	0	0	0	0	0	0	0	0	0	0	0	0	0	0	0	0	0
1	22	190194	190356	161.663	22.5386	BRINP3;	0	0	0	0	0	0	0	0	0	0	0	0	0	0	0	0	0	0	0	0
19	1	10735.5	10799.8	64.22	22.4248	SLC44A2;ILF3;	4	0	4	0	0	1	1	0	1	1	0	0	0	0	0	0	0	0	0	0
14	10	104433	104524	91.023	22.4061	TDRD9;	4	0	4	0	0	1	1	0	1	1	0	0	0	0	0	0	0	0	0	0
8	15	113780	113894	113.407	22.378	CSMD3;	3	0	3	0	0	0	1	0	1	1	0	0	0	0	0	0	0	0	0	0
11	4	28946.8	29041.5	94.779	22.3699	RP11-115J23.1;	1	1	1	0	1	0	0	0	0	1	0	0	0	0	0	0	0	0	0	1
8	16	114411	114665	254.189	22.3307	CSMD3;RP11-67H2.1;	4	2	4	2	0	1	1	0	1	1	1	0	1	0	0	0	0	0	0	0
3	8	99949.8	100038	88.6	22.3071	TBC1D23;	0	0	0	0	0	0	0	0	0	0	0	0	0	0	0	0	0	0	0	0
4	24	142531	142589	58.759	22.2585	IL15;	1	0	1	0	0	0	0	0	0	1	0	0	0	0	0	0	0	0	0	0
8	7	49134	49293	159.042	22.1713	CTD-2210A23.1;RNU6-295P;RPL29P19;	3	1	3	1	0	1	1	0	0	1	0	1	0	0	0	0	0	0	0	0
11	9	85145.4	85737.5	592.052	22.1649	DLG2;TMEM126B;TMEM126A;PICALM;	2	2	2	2	0	0	1	0	1	0	0	1	1	0	0	0	0	0	0	0
9	7	108478	108539	61.194	22.0804	TMEM38B;	0	0	0	0	0	0	0	0	0	0	0	0	0	0	0	0	0	0	0	0
5	11	86508	87310.9	802.943	22.0763	CTC-242N15.1;RASA1;CTD-2316B1.1;	4	1	4	0	1	1	1	0	1	1	0	0	0	0	0	0	0	0	0	1
4	0	258.512	302.934	44.422	21.8324	ZNF732;	4	0	4	0	0	1	1	0	1	1	0	0	0	0	0	0	0	0	0	0
5	7	56655.4	56762.5	107.092	21.5864	CTD-2023N9.1;SALL4P1;	1	0	1	0	0	0	1	0	0	0	0	0	0	0	0	0	0	0	0	0
4	23	132296	132405	108.989	21.5394	RP11-314N14.1;	0	0	0	0	0	0	0	0	0	0	0	0	0	0	0	0	0	0	0	0
22	2	36179.1	36321.3	142.175	21.5149	RBFOX2;	4	0	4	0	0	1	1	0	1	1	0	0	0	0	0	0	0	0	0	0
6	5	74844.6	75295.9	451.36	21.3888	RP11-554D15.1;	4	0	4	0	0	1	1	0	1	1	0	0	0	0	0	0	0	0	0	0
6	2	62268.7	62971.8	703.091	21.2775	MTRNR2L9;KHDRBS2;	3	3	3	3	0	0	1	0	1	1	1	0	1	0	1	0	0	0	0	0
1	11	93579.6	93699.2	119.664	21.1491	MTF2;TMED5;CCDC18;	2	3	2	2	1	1	0	0	0	1	1	0	0	0	1	0	0	0	1	0
1	30	235436	235546	110.019	21.0024	ARID4B;GGPS1;RP11-382D8.5;TBCE;	0	0	0	0	0	0	0	0	0	0	0	0	0	0	0	0	0	0	0	0
10	4	91318.6	91419.6	101	20.9825	SLC16A12;PANK1;RP11-80H5.6;	4	0	4	0	0	1	1	0	1	1	0	0	0	0	0	0	0	0	0	0
4	7	44223.6	44325.5	101.865	20.9519	KCTD8;	0	1	0	1	0	0	0	0	0	0	0	0	1	0	0	0	0	0	0	0
2	10	160746	160827	80.603	20.9442	LY75-CD302;PLA2R1;	1	0	1	0	0	0	1	0	0	0	0	0	0	0	0	0	0	0	0	0
4	3	13357	13455.1	98.133	20.9147	RAB28;	4	0	4	0	0	1	1	0	1	1	0	0	0	0	0	0	0	0	0	0
2	13	166654	166748	93.962	20.8882	GALNT3;AC009495.2;AC009495.4;AC009495.3;TTC21B;	0	0	0	0	0	0	0	0	0	0	0	0	0	0	0	0	0	0	0	0
7	1	20381.7	20460.4	78.698	20.8738	ITGB8;	3	0	3	0	0	1	0	0	1	1	0	0	0	0	0	0	0	0	0	0
1	6	63856.9	64042.4	185.481	20.8245	ALG6;ITGB3BP;EFCAB7;DLEU2L;	2	0	2	0	0	1	0	0	0	1	0	0	0	0	0	0	0	0	0	0
4	19	119043	119140	97.714	20.8243	NDST3;	2	0	2	0	0	0	1	0	0	1	0	0	0	0	0	0	0	0	0	0
7	11	79506.1	79562.7	56.594	20.7526	RNU6-849P;	0	0	0	0	0	0	0	0	0	0	0	0	0	0	0	0	0	0	0	0
1	8	69543.7	69651.5	107.748	20.7155	RP11-424D14.1;	2	0	2	0	0	1	0	0	0	1	0	0	0	0	0	0	0	0	0	0
1	26	211955	212279	323.616	20.686	LPGAT1;INTS7;DTL;	2	4	2	1	3	0	1	0	1	0	0	1	0	0	0	1	0	1	0	1
2	11	162179	162308	128.535	20.5997	PSMD14;TBR1;AC009487.5;SLC4A10;	2	0	2	0	0	0	1	0	1	0	0	0	0	0	0	0	0	0	0	0
15	1	43061.2	43531.6	470.44	20.3851	TTBK2;UBR1;RPS3AP47;TMEM62;SPCS2P1;EPB42;TGM5;	1	0	1	0	0	0	0	0	0	1	0	0	0	0	0	0	0	0	0	0
1	19	145626	145691	65.321	20.3263		2	0	2	0	0	1	0	0	1	0	0	0	0	0	0	0	0	0	0	0
9	11	129625	130394	768.573	20.3124	ZBTB34;RALGPS1;GARNL3;STXBP1;	0	1	0	0	1	0	0	0	0	0	0	0	0	0	0	0	0	0	0	1
4	1	1871.64	1950.96	79.324	20.2811	WHSC1;	2	0	2	0	0	0	1	0	0	1	0	0	0	0	0	0	0	0	0	0
3	11	120259	120322	63.147	20.2667	NDUFB4;	4	0	4	0	0	1	1	0	1	1	0	0	0	0	0	0	0	0	0	0
8	1	30313.4	30377.4	63.98	20.2394	RBPMS;	0	0	0	0	0	0	0	0	0	0	0	0	0	0	0	0	0	0	0	0
2	23	239366	239437	71.683	20.2313	LINC01107;	0	0	0	0	0	0	0	0	0	0	0	0	0	0	0	0	0	0	0	0
10	5	92158.7	92363.2	204.455	20.2274	RP11-15K3.1;RP11-94M14.2;	1	0	1	0	0	0	0	0	0	1	0	0	0	0	0	0	0	0	0	0
4	30	166154	166209	55.312	20.2265	KLHL2;	0	1	0	0	1	0	0	0	0	0	0	0	0	0	0	0	1	0	0	0
2	14	175702	176718	1015.55	20.1569	CHN1;ATF2;ATP5G3;AC096649.3;EXTL2P1;	3	4	3	4	0	0	1	0	1	1	1	1	1	1	0	0	0	0	0	0
1	15	112167	112236	69.276	20.0228	RAP1A;	0	0	0	0	0	0	0	0	0	0	0	0	0	0	0	0	0	0	0	0
12	3	45609.3	45668.6	59.325	20.0159	ANO6;	1	0	1	0	0	0	0	0	1	0	0	0	0	0	0	0	0	0	0	0
14	2	46816.9	46898.5	81.57	19.9819	LINC00871;	0	0	0	0	0	0	0	0	0	0	0	0	0	0	0	0	0	0	0	0
20	2	37536.1	37707.4	171.325	19.9743	PPP1R16B;FAM83D;DHX35;	3	0	3	0	0	0	1	0	1	1	0	0	0	0	0	0	0	0	0	0
5	8	66832.5	66936.3	103.775	19.8977	RP11-434D9.1;RP11-83M16.1;BCL9P1;RP11-83M16.5;	0	0	0	0	0	0	0	0	0	0	0	0	0	0	0	0	0	0	0	0
6	15	151810	151902	92.28	19.8718	CCDC170;	0	5	0	5	0	0	0	0	0	0	1	1	1	1	1	0	0	0	0	0
10	7	98034.7	98090	55.323	19.7751	BLNK;RP11-35J23.1;DNTT;	0	0	0	0	0	0	0	0	0	0	0	0	0	0	0	0	0	0	0	0
10	3	90229.2	90327.7	98.419	19.7294	RNLS;	0	0	0	0	0	0	0	0	0	0	0	0	0	0	0	0	0	0	0	0
3	10	105542	105618	75.992	19.6982	CBLB;	0	0	0	0	0	0	0	0	0	0	0	0	0	0	0	0	0	0	0	0
3	16	163812	163904	91.777	19.6773	MIR1263;	4	0	4	0	0	1	1	0	1	1	0	0	0	0	0	0	0	0	0	0
7	15	114643	114740	96.712	19.6579	MDFIC;LINC01392;LINC01393;	1	0	1	0	0	0	1	0	0	0	0	0	0	0	0	0	0	0	0	0
2	8	155796	155950	154.165	19.6497	CBX3P6;AC092625.1;RNU6-1001P;	4	3	4	3	0	1	1	0	1	1	1	0	0	1	1	0	0	0	0	0
15	6	77440.9	77832.3	391.392	19.629	PEAK1;HMG20A;RP11-307C19.1;	4	0	4	0	0	1	1	0	1	1	0	0	0	0	0	0	0	0	0	0
12	15	94721.8	94790.3	68.544	19.6288	CEP83;	0	0	0	0	0	0	0	0	0	0	0	0	0	0	0	0	0	0	0	0
12	1	21858.2	21931.9	73.754	19.5649	RP11-59N23.3;KCNJ8;	1	0	1	0	0	1	0	0	0	0	0	0	0	0	0	0	0	0	0	0
8	8	50143.5	50243.1	99.688	19.5136	RN7SKP294;	3	1	3	1	0	1	1	0	0	1	0	0	1	0	0	0	0	0	0	0
21	1	33021.4	33091.4	70.016	19.461	AP000253.1;SOD1;SCAF4;	0	0	0	0	0	0	0	0	0	0	0	0	0	0	0	0	0	0	0	0
8	12	76695.3	76801.3	106.03	19.4427		4	5	4	0	5	1	1	0	1	1	0	0	0	0	0	1	1	1	1	1
1	20	150306	150456	150.504	19.4217	PRPF3;RPRD2;TARS2;	2	0	2	0	0	0	0	0	1	1	0	0	0	0	0	0	0	0	0	0
15	3	57294.5	57388.3	93.897	19.4199	TCF12;	1	0	1	0	0	0	1	0	0	0	0	0	0	0	0	0	0	0	0	0
3	2	33666.1	33742.3	76.202	19.3551	CLASP2;	1	0	1	0	0	0	1	0	0	0	0	0	0	0	0	0	0	0	0	0
4	28	157099	157152	52.242	19.2928		0	0	0	0	0	0	0	0	0	0	0	0	0	0	0	0	0	0	0	0
1	14	108854	108921	66.356	19.2767	SLC25A24P1;NBPF6;	0	0	0	0	0	0	0	0	0	0	0	0	0	0	0	0	0	0	0	0
8	4	39411.9	39481.3	69.419	19.2561	RP11-122L4.2;ADAM18;	0	1	0	0	1	0	0	0	0	0	0	0	0	0	0	1	0	0	0	0
1	5	51573.8	51643.7	69.858	19.2534	C1orf185;	3	0	3	0	0	1	1	0	1	0	0	0	0	0	0	0	0	0	0	0
7	17	141282	141363	80.816	19.2367	AGK;KIAA1147;	0	0	0	0	0	0	0	0	0	0	0	0	0	0	0	0	0	0	0	0
16	8	72165.9	72261	95.135	19.2253	PMFBP1;RP11-328J14.1;	4	0	4	0	0	1	1	0	1	1	0	0	0	0	0	0	0	0	0	0
3	3	37914.1	38005.2	91.122	19.224	CTDSPL;	0	0	0	0	0	0	0	0	0	0	0	0	0	0	0	0	0	0	0	0
11	7	73417.5	73482	64.481	19.0808	RAB6A;	1	0	1	0	0	0	1	0	0	0	0	0	0	0	0	0	0	0	0	0
2	7	150571	150669	98.02	19.0767	AC144449.1;AC007364.1;	3	0	3	0	0	0	1	0	1	1	0	0	0	0	0	0	0	0	0	0
20	1	34234.6	34546.7	312.038	19.0206	RBM12;PHF20;SCAND1;	4	10	4	5	5	1	1	0	1	1	1	1	1	1	1	1	1	1	1	1
8	13	89734.3	89823.7	89.353	19.0115	RP11-586K2.1;RP11-642C5.1;	0	0	0	0	0	0	0	0	0	0	0	0	0	0	0	0	0	0	0	0
5	4	50194.5	50270.4	75.848	18.9989	RP11-317O24.3;RP11-317O24.2;CTD-2089N3.1;CTD-2089N3.3;CTD-2089N3.2;	0	0	0	0	0	0	0	0	0	0	0	0	0	0	0	0	0	0	0	0
11	11	102950	102989	39.404	18.987	DCUN1D5;DYNC2H1;	0	0	0	0	0	0	0	0	0	0	0	0	0	0	0	0	0	0	0	0
13	6	61036.7	61075.6	38.88	18.9601	TDRD3;	2	0	2	0	0	0	1	0	1	0	0	0	0	0	0	0	0	0	0	0
1	27	219127	219174	46.996	18.9268		0	0	0	0	0	0	0	0	0	0	0	0	0	0	0	0	0	0	0	0
11	0	10044.6	10128.9	84.243	18.9241	SBF2;	4	0	4	0	0	1	1	0	1	1	0	0	0	0	0	0	0	0	0	0
20	4	43816.6	43856	39.431	18.9115	SEMG1;SEMG2;	0	0	0	0	0	0	0	0	0	0	0	0	0	0	0	0	0	0	0	0
14	0	27305.8	27362.9	57.152	18.8883	RP11-384J4.2;MIR4307HG;	1	0	1	0	0	1	0	0	0	0	0	0	0	0	0	0	0	0	0	0
1	18	120442	120520	77.361	18.8357	ADAM30;RP5-1042I8.7;NOTCH2;	0	0	0	0	0	0	0	0	0	0	0	0	0	0	0	0	0	0	0	0
5	13	101704	102453	749.033	18.8276	SLCO6A1;PAM;GIN1;	2	0	2	0	0	1	0	0	0	1	0	0	0	0	0	0	0	0	0	0
6	11	127000	127046	46.015	18.8001	RPS4XP9;	3	0	3	0	0	0	1	0	1	1	0	0	0	0	0	0	0	0	0	0
4	31	168129	168154	25.535	18.7969	SPOCK3;	3	0	3	0	0	1	0	0	1	1	0	0	0	0	0	0	0	0	0	0
22	3	38250.7	38347.3	96.536	18.7372	EIF3L;MICALL1;C22orf23;	2	0	2	0	0	1	0	0	1	0	0	0	0	0	0	0	0	0	0	0
8	2	32764.1	32777.1	13.007	18.7092	RNU6-663P;	0	0	0	0	0	0	0	0	0	0	0	0	0	0	0	0	0	0	0	0
4	8	45411.5	45665.1	253.616	18.7083	RP11-270L13.1;RNU6-931P;	1	0	1	0	0	0	1	0	0	0	0	0	0	0	0	0	0	0	0	0
16	6	62047.9	62112.2	64.283	18.7025	CDH8;	2	0	2	0	0	0	0	0	1	1	0	0	0	0	0	0	0	0	0	0
11	12	108870	109513	643.545	18.69	RP11-25I9.2;RNU6-654P;RP11-708B6.2;RP11-386B1.1;	3	1	3	1	0	1	1	0	0	1	0	0	1	0	0	0	0	0	0	0
4	10	69419.3	69447.6	28.304	18.6759	UGT2B17;	0	2	0	0	2	0	0	0	0	0	0	0	0	0	0	0	1	0	1	0
2	17	187952	188033	80.879	18.6687	AC007319.1;	0	1	0	0	1	0	0	0	0	0	0	0	0	0	0	0	0	1	0	0
10	2	88889.1	88951	61.871	18.6655	FAM35A;	0	0	0	0	0	0	0	0	0	0	0	0	0	0	0	0	0	0	0	0
22	1	33288	33394.1	106.081	18.6647	SYN3;	0	0	0	0	0	0	0	0	0	0	0	0	0	0	0	0	0	0	0	0
4	2	3126.81	3161.85	35.033	18.6421	HTT;	0	0	0	0	0	0	0	0	0	0	0	0	0	0	0	0	0	0	0	0
4	18	112877	112963	86.927	18.6404	RP11-269F21.3;	1	0	1	0	0	0	1	0	0	0	0	0	0	0	0	0	0	0	0	0
22	0	30082.9	30209.3	126.388	18.6381	NF2;RP1-76B20.11;CABP7;ZMAT5;UQCR10;ASCC2;	2	0	2	0	0	1	1	0	0	0	0	0	0	0	0	0	0	0	0	0
7	7	49141.1	49334.5	193.46	18.6196	AC010971.1;DDX43P2;	1	0	1	0	0	0	0	0	1	0	0	0	0	0	0	0	0	0	0	0
8	11	72475.7	72595.6	119.841	18.5669	RP11-1102P16.1;RP11-1144P22.1;	3	0	3	0	0	1	1	0	1	0	0	0	0	0	0	0	0	0	0	0
2	5	128050	128082	32.051	18.5463	ERCC3;MAP3K2;	0	0	0	0	0	0	0	0	0	0	0	0	0	0	0	0	0	0	0	0
1	23	200326	200372	46.27	18.4981	LINC00862;ZNF281;	0	0	0	0	0	0	0	0	0	0	0	0	0	0	0	0	0	0	0	0
10	11	122796	122864	68.103	18.483		1	0	1	0	0	0	0	0	1	0	0	0	0	0	0	0	0	0	0	0
2	9	159368	159457	88.249	18.4723	PKP4;	0	2	0	0	2	0	0	0	0	0	0	0	0	0	0	1	0	1	0	0
6	4	72706.5	72927.3	220.769	18.453	RIMS1;	3	0	3	0	0	1	1	0	0	1	0	0	0	0	0	0	0	0	0	0
6	12	128025	128026	0.118	18.4352	THEMIS;	0	0	0	0	0	0	0	0	0	0	0	0	0	0	0	0	0	0	0	0
2	4	105917	105973	56.3	18.428	TGFBRAP1;C2orf49;FHL2;	0	0	0	0	0	0	0	0	0	0	0	0	0	0	0	0	0	0	0	0
3	15	160475	160544	68.254	18.393	PPM1L;	2	0	2	0	0	0	0	0	1	1	0	0	0	0	0	0	0	0	0	0
10	12	134465	134470	5.114	18.3689	INPP5A;	0	0	0	0	0	0	0	0	0	0	0	0	0	0	0	0	0	0	0	0
4	6	36232.2	36321.3	89.086	18.3482	ARAP2;RP11-431M7.3;DTHD1;	1	0	1	0	0	0	0	0	1	0	0	0	0	0	0	0	0	0	0	0
4	12	73950.3	73999.9	49.624	18.324	ANKRD17;	1	0	1	0	0	1	0	0	0	0	0	0	0	0	0	0	0	0	0	0
4	25	145373	145375	2.271	18.308		1	0	1	0	0	1	0	0	0	0	0	0	0	0	0	0	0	0	0	0
12	12	85717.8	85741.6	23.857	18.2938	RP11-408B11.2;	0	0	0	0	0	0	0	0	0	0	0	0	0	0	0	0	0	0	0	0
15	4	69820.2	69880.5	60.341	18.2383	DRAIC;WWP2;PCAT29;	0	0	0	0	0	0	0	0	0	0	0	0	0	0	0	0	0	0	0	0
7	4	35144.5	35226.9	82.384	18.2184	DPY19L2P1;S100A11P2;	3	0	3	0	0	0	1	0	1	1	0	0	0	0	0	0	0	0	0	0
6	1	56488.5	56569.1	80.633	18.2168	DST;	2	0	2	0	0	0	1	0	1	0	0	0	0	0	0	0	0	0	0	0
6	13	130524	130713	188.843	18.2138	SAMD3;TMEM200A;	1	0	1	0	0	0	0	0	0	1	0	0	0	0	0	0	0	0	0	0
12	10	82095.3	82157.4	62.057	18.1795	PPFIA2;	4	0	4	0	0	1	1	0	1	1	0	0	0	0	0	0	0	0	0	0
13	5	57711	57892.6	181.596	18.095	PRR20A;SLC25A5P4;	4	0	4	0	0	1	1	0	1	1	0	0	0	0	0	0	0	0	0	0
8	6	47458.8	47463.2	4.391	18.0578	HSPA8P13;	0	0	0	0	0	0	0	0	0	0	0	0	0	0	0	0	0	0	0	0
11	3	27456.1	27508.7	52.622	17.9397	LGR4;RP11-159H22.1;	0	0	0	0	0	0	0	0	0	0	0	0	0	0	0	0	0	0	0	0
12	2	26953.4	27001.6	48.158	17.9226	ITPR2;	2	0	2	0	0	1	1	0	0	0	0	0	0	0	0	0	0	0	0	0
8	17	118400	118401	1.036	17.9128		3	0	3	0	0	0	1	0	1	1	0	0	0	0	0	0	0	0	0	0
7	3	23342.5	23375.4	32.901	17.878	MALSU1;IGF2BP3;	0	0	0	0	0	0	0	0	0	0	0	0	0	0	0	0	0	0	0	0
5	16	158590	158618	28.367	17.8676	RNF145;	0	0	0	0	0	0	0	0	0	0	0	0	0	0	0	0	0	0	0	0
13	7	76242.3	76327	84.692	17.8474	RP11-29G8.3;	4	0	4	0	0	1	1	0	1	1	0	0	0	0	0	0	0	0	0	0
1	0	26783.8	26810.6	26.845	17.841	DHDDS;HMGN2;	0	2	0	0	2	0	0	0	0	0	0	0	0	0	0	0	0	1	1	0
4	26	146854	146884	30.295	17.8239	ZNF827;Y_RNA;	2	0	2	0	0	1	0	0	0	1	0	0	0	0	0	0	0	0	0	0
9	0	23891.8	24230	338.188	17.8224	RP11-321L2.2;	1	0	1	0	0	1	0	0	0	0	0	0	0	0	0	0	0	0	0	0
3	0	12094.1	12152.8	58.706	17.8193	SYN2;ACTG1P12;	0	0	0	0	0	0	0	0	0	0	0	0	0	0	0	0	0	0	0	0
12	6	70509.9	70552.5	42.661	17.8119	LINC01481;	2	1	2	1	0	1	1	0	0	0	0	0	0	0	1	0	0	0	0	0
1	24	202648	202667	19.007	17.8041	SYT2;	2	0	2	0	0	1	0	0	1	0	0	0	0	0	0	0	0	0	0	0
10	6	96051.6	96115	63.412	17.803	PLCE1;NOC3L;	0	0	0	0	0	0	0	0	0	0	0	0	0	0	0	0	0	0	0	0
14	9	102142	102284	141.624	17.7977	RP11-1029J19.5;RP11-796G6.1;LINC00239;PPP2R5C;	4	0	4	0	0	1	1	0	1	1	0	0	0	0	0	0	0	0	0	0
10	8	100974	101001	26.115	17.7938	HPSE2;	2	0	2	0	0	1	0	0	0	1	0	0	0	0	0	0	0	0	0	0
4	22	130640	130701	60.049	17.7846	RP11-519M16.1;RP11-422J15.1;	3	0	3	0	0	1	0	0	1	1	0	0	0	0	0	0	0	0	0	0
18	1	41990.7	41996.2	5.534	17.7664	LINC01478;	2	0	2	0	0	0	1	0	1	0	0	0	0	0	0	0	0	0	0	0
8	5	42916.8	42952	35.146	17.7568	FNTA;POMK;	0	0	0	0	0	0	0	0	0	0	0	0	0	0	0	0	0	0	0	0
3	12	131889	131970	80.484	17.7173	CPNE4;	0	3	0	3	0	0	0	0	0	0	0	1	0	1	1	0	0	0	0	0
6	6	83968.9	84016.9	47.934	17.7139	ME1;	1	0	1	0	0	1	0	0	0	0	0	0	0	0	0	0	0	0	0	0
7	9	66349.7	66361.6	11.947	17.703	GTF2IP23;RNU6-1254P;	1	0	1	0	0	0	0	0	1	0	0	0	0	0	0	0	0	0	0	0
15	0	42496.7	42534.4	37.621	17.655	VPS39;TMEM87A;	0	0	0	0	0	0	0	0	0	0	0	0	0	0	0	0	0	0	0	0
14	5	71921	71956.3	35.296	17.6366	SIPA1L1;	0	0	0	0	0	0	0	0	0	0	0	0	0	0	0	0	0	0	0	0
2	21	207146	207225	78.696	17.6354	ZDBF2;	4	0	4	0	0	1	1	0	1	1	0	0	0	0	0	0	0	0	0	0
5	0	8981.34	9017.89	36.551	17.6021	CTD-2215L10.1;	0	0	0	0	0	0	0	0	0	0	0	0	0	0	0	0	0	0	0	0
5	2	28789.6	28813.6	24.018	17.5665	CTD-2134P3.1;	1	0	1	0	0	1	0	0	0	0	0	0	0	0	0	0	0	0	0	0
13	0	30503.7	30535.6	31.876	17.5497	LINC00572;LINC00544;	0	0	0	0	0	0	0	0	0	0	0	0	0	0	0	0	0	0	0	0
7	5	43980.5	44504.7	524.17	17.544	UBE2D4;NUDCD3;	2	0	2	0	0	1	1	0	0	0	0	0	0	0	0	0	0	0	0	0
9	10	117338	117376	38.176	17.5284	RP11-402G3.6;ATP6V1G1;C9orf91;	1	0	1	0	0	0	1	0	0	0	0	0	0	0	0	0	0	0	0	0
8	14	110966	110989	23.227	17.4933	KCNV1;	0	0	0	0	0	0	0	0	0	0	0	0	0	0	0	0	0	0	0	0
19	4	36419.6	36455.8	36.21	17.4736	LRFN3;AF038458.3;AF038458.5;	0	0	0	0	0	0	0	0	0	0	0	0	0	0	0	0	0	0	0	0
2	16	183353	183408	54.59	17.468	PDE1A;	0	0	0	0	0	0	0	0	0	0	0	0	0	0	0	0	0	0	0	0
19	2	22266.7	22279.3	12.598	17.434	ZNF257;	1	0	1	0	0	1	0	0	0	0	0	0	0	0	0	0	0	0	0	0
5	1	19125.1	19147.3	22.173	17.4322	RP11-124N3.3;	1	0	1	0	0	0	0	0	1	0	0	0	0	0	0	0	0	0	0	0
10	1	52596.1	52617.5	21.398	17.4238	A1CF;	1	0	1	0	0	1	0	0	0	0	0	0	0	0	0	0	0	0	0	0
4	17	110393	110422	28.382	17.4195	SEC24B;	4	0	4	0	0	1	1	0	1	1	0	0	0	0	0	0	0	0	0	0
9	6	102456	102486	29.734	17.351	RP11-554F20.1;	1	0	1	0	0	0	1	0	0	0	0	0	0	0	0	0	0	0	0	0
22	4	40235.8	40264.6	28.748	17.3415	ENTHD1;	0	0	0	0	0	0	0	0	0	0	0	0	0	0	0	0	0	0	0	0
1	12	98130.4	98143.3	12.817	17.3291	DPYD;	1	0	1	0	0	0	0	0	1	0	0	0	0	0	0	0	0	0	0	0
2	20	201707	201731	23.786	17.3213	BICD1P1;CLK1;	1	0	1	0	0	0	0	0	1	0	0	0	0	0	0	0	0	0	0	0
1	7	66066	66077.6	11.625	17.2889	LEPR;	1	0	1	0	0	0	0	0	1	0	0	0	0	0	0	0	0	0	0	0
15	7	85815.9	86033.2	217.282	17.2817	RP11-561C5.7;ADAMTS7P4;AKAP13;	0	0	0	0	0	0	0	0	0	0	0	0	0	0	0	0	0	0	0	0
8	9	60881.8	60938.9	57.101	17.2308		2	0	2	0	0	0	1	0	1	0	0	0	0	0	0	0	0	0	0	0
13	1	36383.3	36404.2	20.937	17.2252	DCLK1;	0	0	0	0	0	0	0	0	0	0	0	0	0	0	0	0	0	0	0	0
2	0	53246.1	53268	21.926	17.2247		0	0	0	0	0	0	0	0	0	0	0	0	0	0	0	0	0	0	0	0
2	15	182143	182206	63.106	17.1917	AC104820.2;	4	0	4	0	0	1	1	0	1	1	0	0	0	0	0	0	0	0	0	0
1	17	118745	118766	21.404	17.182		0	0	0	0	0	0	0	0	0	0	0	0	0	0	0	0	0	0	0	0
2	2	63909.4	63942.8	33.391	17.1454	AC096664.1;WDPCP;AC096664.2;	0	0	0	0	0	0	0	0	0	0	0	0	0	0	0	0	0	0	0	0
7	16	135294	135323	28.471	17.1373	NUP205;	0	0	0	0	0	0	0	0	0	0	0	0	0	0	0	0	0	0	0	0
11	8	74022.2	74049.6	27.406	17.1176	P4HA3;RP11-632K5.3;PGM2L1;	0	0	0	0	0	0	0	0	0	0	0	0	0	0	0	0	0	0	0	0
4	20	125419	125728	309.387	17.0951	RP11-93I21.3;	0	0	0	0	0	0	0	0	0	0	0	0	0	0	0	0	0	0	0	0
11	5	61500.5	61571.3	70.861	17.0511	DAGLA;MYRF;FADS1;	0	3	0	1	2	0	0	0	0	0	0	0	0	1	0	0	1	0	1	0
9	8	115057	115560	502.711	17.0307	PTBP3;SNX30;	3	0	3	0	0	1	1	0	1	0	0	0	0	0	0	0	0	0	0	0
3	6	69885.2	69919.6	34.345	17.0084	MITF;	3	0	3	0	0	1	1	0	0	1	0	0	0	0	0	0	0	0	0	0
11	2	24256.3	24286.6	30.381	17.0014	RP11-2F20.1;	0	0	0	0	0	0	0	0	0	0	0	0	0	0	0	0	0	0	0	0
18	2	46747.5	46765.1	17.649	16.9799	DYM;	2	0	2	0	0	1	0	0	1	0	0	0	0	0	0	0	0	0	0	0
7	8	65355.1	65427.1	72.032	16.9641	VKORC1L1;GUSB;	1	0	1	0	0	0	0	0	0	1	0	0	0	0	0	0	0	0	0	0
12	7	76787.6	76859.3	71.705	16.9083	OSBPL8;	4	0	4	0	0	1	1	0	1	1	0	0	0	0	0	0	0	0	0	0
4	11	72203.7	72231.9	28.27	16.8854	SLC4A4;	2	0	2	0	0	1	1	0	0	0	0	0	0	0	0	0	0	0	0	0
7	14	105884	105899	15.601	16.8689	NAMPT;	0	0	0	0	0	0	0	0	0	0	0	0	0	0	0	0	0	0	0	0
1	3	32870.9	32913.6	42.645	16.8665	GAPDHP20;RP11-395N6.4;LRRC37A12P;	0	0	0	0	0	0	0	0	0	0	0	0	0	0	0	0	0	0	0	0
8	18	122035	122079	43.888	16.8663	RP11-369K17.1;	4	0	4	0	0	1	1	0	1	1	0	0	0	0	0	0	0	0	0	0
14	7	81532.9	81586.8	53.854	16.858	TSHR;	1	0	1	0	0	1	0	0	0	0	0	0	0	0	0	0	0	0	0	0
2	3	86485.1	86497.5	12.346	16.8411	REEP1;	1	0	1	0	0	0	0	0	0	1	0	0	0	0	0	0	0	0	0	0
12	8	78784	78810.2	26.171	16.8187	RP11-754N21.1;	0	0	0	0	0	0	0	0	0	0	0	0	0	0	0	0	0	0	0	0
5	14	130234	130234	0	16.8178		1	1	1	1	0	0	1	0	0	0	0	0	0	1	0	0	0	0	0	0
10	13	135233	135244	11.419	16.8145	RP11-108K14.8;SPRN;	0	0	0	0	0	0	0	0	0	0	0	0	0	0	0	0	0	0	0	0
7	13	100003	100019	16.132	16.8073	ZCWPW1;	0	0	0	0	0	0	0	0	0	0	0	0	0	0	0	0	0	0	0	0
10	10	113936	113954	18.139	16.7982	GPAM;	0	0	0	0	0	0	0	0	0	0	0	0	0	0	0	0	0	0	0	0
9	3	74507.5	74535.8	28.288	16.7932	C9orf85;	4	0	4	0	0	1	1	0	1	1	0	0	0	0	0	0	0	0	0	0
2	22	214375	214453	77.323	16.7558	SPAG16;	2	0	2	0	0	0	1	0	1	0	0	0	0	0	0	0	0	0	0	0
4	5	30984.3	30996.4	12.109	16.7438	PCDH7;	0	0	0	0	0	0	0	0	0	0	0	0	0	0	0	0	0	0	0	0
7	0	2825.92	2848.83	22.905	16.7136	GNA12;	1	0	1	0	0	0	0	0	0	1	0	0	0	0	0	0	0	0	0	0
2	1	62754.1	62806.4	52.26	16.7131	AC092155.1;PSAT1P2;RSL24D1P2;	0	0	0	0	0	0	0	0	0	0	0	0	0	0	0	0	0	0	0	0
1	2	28489.7	28515.3	25.6	16.6721	PTAFR;	0	0	0	0	0	0	0	0	0	0	0	0	0	0	0	0	0	0	0	0
19	0	2433.71	2443.4	9.685	16.649	LMNB2;	0	0	0	0	0	0	0	0	0	0	0	0	0	0	0	0	0	0	0	0
4	14	92581.5	92954.4	372.975	16.6473		4	0	4	0	0	1	1	0	1	1	0	0	0	0	0	0	0	0	0	0
6	9	98486.9	98559.7	72.841	16.6358	RP11-436D23.1;	0	1	0	0	1	0	0	0	0	0	0	0	0	0	0	1	0	0	0	0
9	1	31908.5	31909.2	0.709	16.6254		0	0	0	0	0	0	0	0	0	0	0	0	0	0	0	0	0	0	0	0
12	0	14908.1	14915.9	7.816	16.6251	RP11-174G6.1;RP11-174G6.5;	0	0	0	0	0	0	0	0	0	0	0	0	0	0	0	0	0	0	0	0
20	3	42928.4	42944.6	16.218	16.5984	FITM2;	0	0	0	0	0	0	0	0	0	0	0	0	0	0	0	0	0	0	0	0
3	14	141495	141526	31.001	16.5869	GRK7;	0	0	0	0	0	0	0	0	0	0	0	0	0	0	0	0	0	0	0	0
6	14	138193	138199	6.672	16.5736	TNFAIP3;	1	0	1	0	0	0	0	0	1	0	0	0	0	0	0	0	0	0	0	0
18	3	49367	49374.1	7.049	16.513	RPS8P3;	0	0	0	0	0	0	0	0	0	0	0	0	0	0	0	0	0	0	0	0
12	5	62669.8	62713	43.156	16.5102	USP15;	0	0	0	0	0	0	0	0	0	0	0	0	0	0	0	0	0	0	0	0
7	2	21210.1	21210.1	0	16.4631		0	0	0	0	0	0	0	0	0	0	0	0	0	0	0	0	0	0	0	0
5	10	77416.4	77450.4	33.945	16.4619	AP3B1;	0	0	0	0	0	0	0	0	0	0	0	0	0	0	0	0	0	0	0	0
8	0	9540.69	9586.21	45.516	16.4587	TNKS;	1	1	1	1	0	1	0	0	0	0	0	0	0	0	1	0	0	0	0	0
4	29	162960	162962	1.68	16.401	FSTL5;	2	0	2	0	0	1	0	0	0	1	0	0	0	0	0	0	0	0	0	0
14	6	79760	79762.8	2.817	16.3854	NRXN3;	1	0	1	0	0	0	0	0	0	1	0	0	0	0	0	0	0	0	0	0
12	4	55636.2	55639.5	3.308	16.3645	OR6C74;	0	1	0	1	0	0	0	0	0	0	0	0	0	0	1	0	0	0	0	0
9	2	35321.9	35334.8	12.94	16.3576	UNC13B;	0	0	0	0	0	0	0	0	0	0	0	0	0	0	0	0	0	0	0	0
5	17	159401	159410	8.852	16.3264	ADRA1B;	0	0	0	0	0	0	0	0	0	0	0	0	0	0	0	0	0	0	0	0
16	2	27539.5	27563.7	24.177	16.3106	GTF3C1;KIAA0556;	1	0	1	0	0	0	1	0	0	0	0	0	0	0	0	0	0	0	0	0
3	13	135697	135698	0.822	16.2806	PPP2R3A;	1	0	1	0	0	0	0	0	0	1	0	0	0	0	0	0	0	0	0	0
4	32	181086	181086	0	16.2688		3	0	3	0	0	0	1	0	1	1	0	0	0	0	0	0	0	0	0	0
1	10	92846.6	92865.2	18.591	16.2626	RPAP2;	4	1	4	0	1	1	1	0	1	1	0	0	0	0	0	0	0	0	1	0
6	7	86309.7	86309.7	0	16.2374		2	0	2	0	0	0	1	0	0	1	0	0	0	0	0	0	0	0	0	0
3	7	79794.1	79798.6	4.499	16.1834	ROBO1;	0	0	0	0	0	0	0	0	0	0	0	0	0	0	0	0	0	0	0	0
1	9	89073.9	89073.9	0	16.1811		0	0	0	0	0	0	0	0	0	0	0	0	0	0	0	0	0	0	0	0
1	4	36618.3	36618.3	0	16.1792		0	0	0	0	0	0	0	0	0	0	0	0	0	0	0	0	0	0	0	0
14	1	36763	36787.5	24.522	16.1584	MBIP;	0	0	0	0	0	0	0	0	0	0	0	0	0	0	0	0	0	0	0	0
3	9	104226	104226	0.094	16.1478	RP11-281P11.1;	0	0	0	0	0	0	0	0	0	0	0	0	0	0	0	0	0	0	0	0

## Sheet: AFR-MSL
Chrsme	Block	Begin	End	Size (Kb)	max CSS	Genes	wth_sharing	btw_sharing	AFR_sharing	EUR_sharing	ASI_sharing	Share_ESN	Share_GWD	Share_LWK	Share_MSL	Share_YRI	Share_CEU	Share_FIN	Share_GBR	Share_IBS	Share_TSI	Share_CDX	Share_CHB	Share_CHS	Share_JPT	Share_KHV
4	8	53453.4	53622.5	169.022	53.3391	USP46;USP46-AS1;RP11-177B4.2;DANCR;ERVMER34-1;	4	0	4	0	0	1	1	1	0	1	0	0	0	0	0	0	0	0	0	0
3	5	49948.7	52126	2177.26	50.4603	MON1A;RBM6;RBM5;SEMA3F-AS1;CACNA2D2;C3orf18;HEMK1;CISH;MAPKAPK3;RP11-804H8.6;DOCK3;MANF;DCAF1;RAD54L2;POC1A;	4	4	4	0	4	1	1	1	0	1	0	0	0	0	0	1	1	1	0	1
2	27	182148	182723	574.573	40.6545	AC104820.2;ITGA4;CERKL;RNU6ATAC19P;	4	0	4	0	0	1	1	1	0	1	0	0	0	0	0	0	0	0	0	0
13	5	57550.1	58261	710.964	36.4598	PRR20A;PRR20FP;MTCO2P3;SLC25A5P4;RPL31P53;PCDH17;	4	1	4	0	1	1	1	1	0	1	0	0	0	0	0	0	1	0	0	0
1	20	225645	225783	137.612	35.2458	RP11-496N12.6;ENAH;	4	0	4	0	0	1	1	1	0	1	0	0	0	0	0	0	0	0	0	0
1	19	223277	223384	107.482	35.1165	TLR5;RP11-239E10.2;RP11-239E10.3;	4	0	4	0	0	1	1	1	0	1	0	0	0	0	0	0	0	0	0	0
22	3	36176.4	36388.5	212.086	35.0307	RBFOX2;	4	0	4	0	0	1	1	1	0	1	0	0	0	0	0	0	0	0	0	0
15	0	44560.9	44988.7	427.793	34.5226	Metazoa_SRP;CASC4;CTDSPL2;EIF3J;SPG11;PATL2;Y_RNA;	4	0	4	0	0	1	1	1	0	1	0	0	0	0	0	0	0	0	0	0
10	8	104574	104954	379.218	33.3668	WBP1L;CYP17A1;PFN1P11;BORCS7;AS3MT;RP11-724N1.1;CNNM2;NT5C2;	4	0	4	0	0	1	1	1	0	1	0	0	0	0	0	0	0	0	0	0
4	15	107755	107790	35.213	32.8588	ACTR6P1;	4	0	4	0	0	1	1	1	0	1	0	0	0	0	0	0	0	0	0	0
11	5	59398.6	59510.5	111.925	31.2333	PATL1;AP000640.2;RN7SKP192;OR10V1;STX3;OR10Y1P;OR10V3P;	3	0	3	0	0	1	1	0	0	1	0	0	0	0	0	0	0	0	0	0
4	0	190.542	302.934	112.392	31.1724	RP11-1365D11.1;ZNF876P;RP11-478C6.6;ZNF732;	4	0	4	0	0	1	1	1	0	1	0	0	0	0	0	0	0	0	0	0
12	12	86853.6	87568.3	714.739	30.1351	MGAT4C;RPL23AP68;	4	0	4	0	0	1	1	1	0	1	0	0	0	0	0	0	0	0	0	0
2	29	190272	190357	85.247	30.0568	WDR75;AC013439.4;	2	2	2	2	0	0	1	0	0	1	0	0	1	0	1	0	0	0	0	0
4	17	129855	130067	212.345	29.8429	SCLT1;C4orf33;RP11-392L5.2;ZSWIM5P3;	4	0	4	0	0	1	1	1	0	1	0	0	0	0	0	0	0	0	0	0
5	5	55009.1	55139.3	130.188	29.7042	SLC38A9;DDX4;HNRNPH1P3;	3	0	3	0	0	0	1	1	0	1	0	0	0	0	0	0	0	0	0	0
12	11	82840.5	83113.9	273.388	29.4857	METTL25;RP11-263K4.5;RP11-263K4.4;RP11-263K4.3;TMTC2;	4	0	4	0	0	1	1	1	0	1	0	0	0	0	0	0	0	0	0	0
2	30	193151	194993	1841.76	29.4367	PCGEM1;AC092638.1;AC074290.1;AC068135.1;GLULP6;	4	0	4	0	0	1	1	1	0	1	0	0	0	0	0	0	0	0	0	0
13	2	48556.7	48740.2	183.492	29.2756	SUCLA2;SUCLA2-AS1;NUDT15;MED4;POLR2KP2;	4	0	4	0	0	1	1	1	0	1	0	0	0	0	0	0	0	0	0	0
13	0	41913	42514	601.003	28.9969	NAA16;VWA8;	3	1	3	0	1	1	1	0	0	1	0	0	0	0	0	1	0	0	0	0
12	9	79421.7	80339.3	917.548	28.5353	SYT1;RP1-78O14.1;RP11-359M6.2;RP11-359M6.1;NOP56P3;PAWR;RP11-530C5.1;PPP1R12A;RP11-84G21.1;	4	3	4	3	0	1	1	1	0	1	0	0	1	1	1	0	0	0	0	0
2	5	87372	87456.7	84.703	28.3832	AC083899.3;AC083899.1;	2	0	2	0	0	1	1	0	0	0	0	0	0	0	0	0	0	0	0	0
3	3	45997.8	46714.5	716.674	28.2676	FYCO1;FLT1P1;CCR3;CCR1;TDGF1;SNORD77;ALS2CL;	3	0	3	0	0	1	1	0	0	1	0	0	0	0	0	0	0	0	0	0
19	4	37898.7	39216.2	1317.53	27.9772	ZNF569;ZNF570;AC016582.2;WDR87;SIPA1L3;PPP1R14A;SPINT2;CTB-102L5.4;C19orf33;YIF1B;KCNK6;CATSPERG;PSMD8;GGN;SPRED3;FAM98C;RASGRP4;EIF3K;ACTN4;	4	5	4	0	5	1	1	1	0	1	0	0	0	0	0	1	1	1	1	1
2	32	200641	201088	446.687	27.6705	FTCDNL1;AC108032.1;AC073043.1;C2orf69;TYW5;C2orf47;	4	1	4	1	0	1	1	1	0	1	0	0	1	0	0	0	0	0	0	0
14	6	104421	104521	100.372	27.5643	TDRD9;	4	0	4	0	0	1	1	1	0	1	0	0	0	0	0	0	0	0	0	0
5	7	86711.7	87923.8	1212.09	27.5205	CCNH;RNU6-727P;CTD-2316B1.1;TMEM161B;TMEM161B-AS1;CTC-498M16.4;LINC00461;CTC-470C15.1;	4	1	4	0	1	1	1	1	0	1	0	0	0	0	0	0	0	0	0	1
6	1	31718.9	33794.6	2075.71	27.1522	MSH5;SAPCD1;VWA7;VARS;LSM2;HSPA1L;HSPA1B;C6orf48;NELFE;SKIV2L;DXO;STK19;C4A;C4B;CYP21A2;TNXB;RNA5SP206;ATF6B;FKBPL;PRRT1;PPT2;EGFL8;AGPAT1;RNF5;AGER;PBX2;GPSM3;NOTCH4;XXbac-BPG154L12.4;C6orf10;HLA-DRB9;HLA-DRB5;RNU1-61P;HLA-DRB6;HLA-DRB1;HLA-DQA1;HLA-DPB2;HLA-DPA3;HCG24;COL11A2;RXRB;HSD17B8;RING1;ZNF70P1;LYPLA2P1;KIFC1;PHF1;CUTA;SYNGAP1;LEMD2;MLN;	4	5	4	2	3	1	1	1	0	1	1	1	0	0	0	1	0	0	1	1
14	2	60916.2	61247.2	331.016	26.9992	C14orf39;SALL4P7;SIX6;RP11-1042B17.3;RP11-1042B17.1;RP11-1042B17.2;SALRNA1;SIX1;SIX4;MNAT1;	4	0	4	0	0	1	1	1	0	1	0	0	0	0	0	0	0	0	0	0
11	1	16052.2	16720.5	668.313	26.8655	SOX6;	4	1	4	1	0	1	1	1	0	1	0	0	1	0	0	0	0	0	0	0
9	5	100561	100721	159.871	26.8651	PTCSC2;FOXE1;TRMO;HEMGN;	4	0	4	0	0	1	1	1	0	1	0	0	0	0	0	0	0	0	0	0
20	0	20423	20659	235.959	26.358	RALGAPA2;	3	0	3	0	0	1	1	0	0	1	0	0	0	0	0	0	0	0	0	0
3	8	99597.9	99806.5	208.568	25.8942	FILIP1L;	1	0	1	0	0	0	1	0	0	0	0	0	0	0	0	0	0	0	0	0
1	14	160997	161164	167.131	25.6068	TSTD1;USF1;ARHGAP30;NECTIN4;KLHDC9;PFDN2;NIT1;DEDD;ACA64;UFC1;USP21;PPOX;B4GALT3;ADAMTS4;	4	0	4	0	0	1	1	1	0	1	0	0	0	0	0	0	0	0	0	0
10	4	91316.8	91422.6	105.827	25.5193	SLC16A12;PANK1;RP11-80H5.6;RP11-80H5.9;	4	0	4	0	0	1	1	1	0	1	0	0	0	0	0	0	0	0	0	0
16	7	71737.7	72574.4	836.737	25.3197	PHLPP2;AP1G1;RP11-417N10.3;ATXN1L;ZNF821;IST1;PMFBP1;RP11-328J14.1;LINC01572;AC004158.3;	4	0	4	0	0	1	1	1	0	1	0	0	0	0	0	0	0	0	0	0
4	16	110338	110476	137.784	25.3032	SEC24B-AS1;CDC42P4;SETP20;	4	0	4	0	0	1	1	1	0	1	0	0	0	0	0	0	0	0	0	0
11	0	9868.84	10330.5	461.615	25.2232	SBF2;RP11-351I24.1;ADM;	4	2	4	2	0	1	1	1	0	1	0	0	0	1	1	0	0	0	0	0
7	11	84206.1	84644.3	438.248	25.2071	AC003984.1;AC074183.4;HNRNPA1P8;SEMA3D;	2	5	2	1	4	0	1	0	0	1	0	0	1	0	0	1	1	1	0	1
16	2	22935.9	23168.6	232.753	25.1893	RP11-20G6.2;USP31;	4	0	4	0	0	1	1	1	0	1	0	0	0	0	0	0	0	0	0	0
3	10	120208	120322	114.067	25.1757	RP11-359H3.1;NDUFB4;	4	0	4	0	0	1	1	1	0	1	0	0	0	0	0	0	0	0	0	0
8	14	113427	114467	1040.6	25.1691	CSMD3;	4	3	4	3	0	1	1	1	0	1	1	1	1	0	0	0	0	0	0	0
6	11	83797.1	83856.3	59.155	24.5174	DOPEY1;	3	0	3	0	0	1	1	0	0	1	0	0	0	0	0	0	0	0	0	0
2	34	202597	202702	105.752	24.3349	ALS2;CDK15;	0	0	0	0	0	0	0	0	0	0	0	0	0	0	0	0	0	0	0	0
1	11	113960	114413	452.781	24.2979	MAGI3;PHTF1;RSBN1;PTPN22;	4	0	4	0	0	1	1	1	0	1	0	0	0	0	0	0	0	0	0	0
15	3	77399.4	77829	429.6	24.1758	PEAK1;HMG20A;RP11-307C19.1;	4	0	4	0	0	1	1	1	0	1	0	0	0	0	0	0	0	0	0	0
6	16	111704	111841	137.007	24.0806	REV3L;TRAF3IP2-AS1;RP3-415N12.1;	3	0	3	0	0	1	1	1	0	0	0	0	0	0	0	0	0	0	0	0
12	10	82062.3	82158.1	95.817	24.0192	PPFIA2;	4	0	4	0	0	1	1	1	0	1	0	0	0	0	0	0	0	0	0	0
5	3	49985.5	50089.9	104.394	23.97	PARP8;	1	0	1	0	0	0	1	0	0	0	0	0	0	0	0	0	0	0	0	0
7	5	38728.8	38880.3	151.475	23.8593	FAM183BP;VPS41;	1	0	1	0	0	0	1	0	0	0	0	0	0	0	0	0	0	0	0	0
1	18	215260	215344	84.09	23.8234	KCNK2;	0	0	0	0	0	0	0	0	0	0	0	0	0	0	0	0	0	0	0	0
3	0	31596.6	31682.5	85.916	23.773	STT3B;	0	0	0	0	0	0	0	0	0	0	0	0	0	0	0	0	0	0	0	0
1	8	92603.4	92867.3	263.939	23.7441	RP4-775D17.1;C1orf146;GLMN;RPAP2;	4	1	4	0	1	1	1	1	0	1	0	0	0	0	0	0	0	0	1	0
12	2	29275.9	29559.3	283.439	23.6903	RP11-946L16.1;FAR2;ERGIC2;OVCH1-AS1;	2	3	2	0	3	1	1	0	0	0	0	0	0	0	0	0	1	0	1	1
18	0	7965.32	8082.39	117.071	23.6146	PTPRM;	3	0	3	0	0	1	0	1	0	1	0	0	0	0	0	0	0	0	0	0
9	0	8590.33	8694.92	104.596	23.5775	PTPRD;	0	0	0	0	0	0	0	0	0	0	0	0	0	0	0	0	0	0	0	0
2	35	207148	207285	136.672	23.5666	ZDBF2;AC017081.2;HNRNPA1P51;	4	0	4	0	0	1	1	1	0	1	0	0	0	0	0	0	0	0	0	0
19	0	10727	11095.9	368.882	23.5026	SLC44A2;ILF3;C19orf38;CARM1;YIPF2;C19orf52;SMARCA4;	4	0	4	0	0	1	1	1	0	1	0	0	0	0	0	0	0	0	0	0
7	9	69056	69787.1	731.103	23.4858	RP5-942I16.1;AUTS2;	4	1	4	1	0	1	1	1	0	1	0	0	0	1	0	0	0	0	0	0
20	1	34207.9	34549.9	342.05	23.4515	SPAG4;CPNE1;RBM12;PHF20;SCAND1;	4	10	4	5	5	1	1	1	0	1	1	1	1	1	1	1	1	1	1	1
7	12	87302.1	87539.2	237.109	23.4125	ABCB1;RUNDC3B;SLC25A40;DBF4;	2	0	2	0	0	0	1	0	0	1	0	0	0	0	0	0	0	0	0	0
7	16	123639	124039	400.155	23.3839	RP4-630C24.3;TMEM229A;RP5-921G16.1;	1	0	1	0	0	0	1	0	0	0	0	0	0	0	0	0	0	0	0	0
7	8	65608	66420	812.044	23.3395	CRCP;RP5-1132H15.1;TPST1;GS1-124K5.2;GS1-124K5.12;SAPCD2P3;GTF2IP23;RNU6-1254P;RP11-458F8.4;RP11-458F8.3;TMEM248;	1	1	1	0	1	0	0	1	0	0	0	0	0	0	0	0	0	0	1	0
13	7	68406.8	68751	344.232	22.9842	NPM1P22;OR7E111P;	2	0	2	0	0	1	0	0	0	1	0	0	0	0	0	0	0	0	0	0
13	8	76227.4	76334.8	107.391	22.8733	RP11-29G8.3;LMO7;	4	0	4	0	0	1	1	1	0	1	0	0	0	0	0	0	0	0	0	0
11	12	110556	110666	109.432	22.5473	ARHGAP20;HNRNPA1P60;	4	0	4	0	0	1	1	1	0	1	0	0	0	0	0	0	0	0	0	0
6	5	56557.3	56972.9	415.539	22.533	DST;RNU6-626P;BEND6;ZNF451;	1	0	1	0	0	0	0	1	0	0	0	0	0	0	0	0	0	0	0	0
6	6	62712.2	62991	278.772	22.5154	KHDRBS2;	3	0	3	0	0	0	1	1	0	1	0	0	0	0	0	0	0	0	0	0
9	2	74482.6	74566.4	83.791	22.4775	ABHD17B;C9orf85;	4	0	4	0	0	1	1	1	0	1	0	0	0	0	0	0	0	0	0	0
13	3	52641.9	52734.9	92.962	22.4349	NEK5;NEK3;	4	0	4	0	0	1	1	1	0	1	0	0	0	0	0	0	0	0	0	0
2	9	114386	114425	38.964	22.2129	RABL2A;RP11-395L14.17;RP11-395L14.13;AC017074.1;	3	0	3	0	0	1	1	0	0	1	0	0	0	0	0	0	0	0	0	0
16	3	34411.2	34523.3	112.095	22.2034	SLC25A1P4;RP11-244B22.7;RP11-488I20.9;RP11-488I20.8;AGGF1P8;	3	0	3	0	0	0	1	1	0	1	0	0	0	0	0	0	0	0	0	0
6	12	87394.9	87739.5	344.642	22.1878	RP1-253B10.1;RP1-253B10.2;HTR1E;	4	0	4	0	0	1	1	1	0	1	0	0	0	0	0	0	0	0	0	0
9	8	127912	128097	184.474	22.1663	PPP6C;RPSAP76;RABEPK;HSPA5;GAPVD1;	2	0	2	0	0	1	0	0	0	1	0	0	0	0	0	0	0	0	0	0
2	16	147424	148034	610.02	22.1328		2	0	2	0	0	0	1	0	0	1	0	0	0	0	0	0	0	0	0	0
13	9	78235	78318.1	83.068	21.9814	SPTLC1P5;MIR3665;SLAIN1;	3	0	3	0	0	1	1	0	0	1	0	0	0	0	0	0	0	0	0	0
4	7	52845.9	52900.5	54.636	21.9538	RP11-61F5.1;LRRC66;SGCB;	4	0	4	0	0	1	1	1	0	1	0	0	0	0	0	0	0	0	0	0
2	0	41698.5	41724.4	25.94	21.9186		0	0	0	0	0	0	0	0	0	0	0	0	0	0	0	0	0	0	0	0
4	24	181028	181125	96.953	21.8817		3	0	3	0	0	0	1	1	0	1	0	0	0	0	0	0	0	0	0	0
4	3	19310.4	19711.2	400.877	21.8368	RP11-3J1.1;RP11-608O21.1;	4	0	4	0	0	1	1	1	0	1	0	0	0	0	0	0	0	0	0	0
8	16	122011	122093	82.171	21.78	RP11-369K17.1;	4	0	4	0	0	1	1	1	0	1	0	0	0	0	0	0	0	0	0	0
11	3	38515.6	38694.8	179.194	21.6867	RP11-63D14.1;RP11-277K23.1;LINC01493;	3	0	3	0	0	1	1	0	0	1	0	0	0	0	0	0	0	0	0	0
2	26	176632	176719	87.42	21.6814	EXTL2P1;	3	0	3	0	0	0	1	1	0	1	0	0	0	0	0	0	0	0	0	0
17	1	26375.5	26494.1	118.671	21.6174	NLK;	2	0	2	0	0	0	1	0	0	1	0	0	0	0	0	0	0	0	0	0
2	1	50293.9	50393.4	99.502	21.5079	NRXN1;	1	1	1	0	1	0	1	0	0	0	0	0	0	0	0	0	0	0	1	0
8	15	118400	118401	1.036	21.4828		3	0	3	0	0	0	1	1	0	1	0	0	0	0	0	0	0	0	0	0
13	4	54760	55637.1	877.038	21.4142		4	0	4	0	0	1	1	1	0	1	0	0	0	0	0	0	0	0	0	0
14	3	81175.2	81349.1	173.901	21.2955	CEP128;	3	2	3	0	2	1	1	0	0	1	0	0	0	0	0	0	1	0	1	0
1	10	101358	101484	125.69	21.2583	EXTL2;SLC30A7;DPH5;	4	0	4	0	0	1	1	1	0	1	0	0	0	0	0	0	0	0	0	0
3	1	34374.8	35468.3	1093.5	21.1409	AC018359.1;	1	1	1	0	1	0	1	0	0	0	0	0	0	0	0	0	0	0	1	0
3	13	163884	163904	19.907	21.0747	MIR1263;	4	0	4	0	0	1	1	1	0	1	0	0	0	0	0	0	0	0	0	0
10	2	86101	86196.9	95.876	21.01	CCSER2;	2	0	2	0	0	1	0	0	0	1	0	0	0	0	0	0	0	0	0	0
2	12	128864	128942	78.024	20.9712	UGGT1;	0	1	0	0	1	0	0	0	0	0	0	0	0	0	0	0	0	0	0	1
6	19	126916	127095	178.105	20.9414	VIM2P;RPS4XP9;	3	0	3	0	0	0	1	1	0	1	0	0	0	0	0	0	0	0	0	0
16	1	15408.4	15827.1	418.725	20.9007	NDE1;MYH11;	3	0	3	0	0	1	1	0	0	1	0	0	0	0	0	0	0	0	0	0
4	10	63963.7	63996.3	32.636	20.6248	RP11-257A22.1;	0	2	0	1	1	0	0	0	0	0	0	0	0	0	1	0	1	0	0	0
4	14	106940	107051	110.571	20.6135	RP11-710F7.3;TBCK;	4	0	4	0	0	1	1	1	0	1	0	0	0	0	0	0	0	0	0	0
1	9	98126.7	98362	235.323	20.5332	DPYD;	2	0	2	0	0	1	0	1	0	0	0	0	0	0	0	0	0	0	0	0
14	5	102096	102279	182.855	20.4947	RP11-1029J19.4;RP11-1029J19.5;RP11-796G6.1;LINC00239;PPP2R5C;	4	0	4	0	0	1	1	1	0	1	0	0	0	0	0	0	0	0	0	0
2	24	174769	175055	285.968	20.4005	SP3;RP11-394I13.2;OLA1;	1	0	1	0	0	0	1	0	0	0	0	0	0	0	0	0	0	0	0	0
2	7	99642.2	99701.8	59.628	20.3504	TSGA10;	1	0	1	0	0	0	1	0	0	0	0	0	0	0	0	0	0	0	0	0
5	8	94471.4	94620.9	149.581	20.3016	MCTP1;	1	0	1	0	0	0	1	0	0	0	0	0	0	0	0	0	0	0	0	0
7	17	132643	132725	82.182	20.2953	CHCHD3;	2	2	2	2	0	1	0	0	0	1	1	0	1	0	0	0	0	0	0	0
8	1	60881.8	61359.8	477.958	20.2612	LINC01301;	2	0	2	0	0	0	1	1	0	0	0	0	0	0	0	0	0	0	0	0
4	13	92954	93022.9	68.927	20.2137		4	0	4	0	0	1	1	1	0	1	0	0	0	0	0	0	0	0	0	0
8	3	72469.4	72508.6	39.177	20.2054	RP11-1102P16.1;	3	0	3	0	0	1	1	1	0	0	0	0	0	0	0	0	0	0	0	0
5	2	43433.1	43889.2	456.064	20.1925	TMEM267;C5orf34;PAIP1;NNT;RP11-8L21.1;	4	6	4	2	4	1	1	1	0	1	0	1	0	1	0	1	1	1	0	1
4	5	46462	46999.2	537.262	20.18	GABRA2;COX7B2;GABRA4;	1	0	1	0	0	0	0	0	0	1	0	0	0	0	0	0	0	0	0	0
18	4	75793.1	75801.3	8.134	20.1783	RNU6-655P;	0	0	0	0	0	0	0	0	0	0	0	0	0	0	0	0	0	0	0	0
4	18	130640	130710	69.745	20.1265	RP11-519M16.1;RP11-422J15.1;	3	0	3	0	0	1	0	1	0	1	0	0	0	0	0	0	0	0	0	0
12	5	46985.2	47068.2	82.925	20.0836	RP11-446N19.1;OR7A19P;	3	0	3	0	0	1	1	0	0	1	0	0	0	0	0	0	0	0	0	0
5	10	138040	138088	47.88	20.0757	CTNNA1;AC034243.1;	1	0	1	0	0	0	0	0	0	1	0	0	0	0	0	0	0	0	0	0
19	3	34879.4	35173.3	293.906	20.0238	GPI;RP11-618P17.4;PDCD2L;UBA2;SCGB2B2;ZNF302;	4	0	4	0	0	1	1	1	0	1	0	0	0	0	0	0	0	0	0	0
11	11	94570.9	94639.7	68.753	19.9822	AMOTL1;RP11-856F16.2;	2	0	2	0	0	1	0	1	0	0	0	0	0	0	0	0	0	0	0	0
11	2	27736.2	27827.9	91.677	19.9748	RP11-587D21.4;	2	0	2	0	0	1	0	0	0	1	0	0	0	0	0	0	0	0	0	0
1	17	211964	211996	32.215	19.9675	LPGAT1;	2	2	2	0	2	0	1	1	0	0	0	0	0	0	0	1	0	1	0	0
2	14	141061	141209	147.165	19.9244	LRP1B;	1	1	1	1	0	0	1	0	0	0	0	1	0	0	0	0	0	0	0	0
11	6	61157.1	61201.2	44.128	19.9216	TMEM216;CPSF7;SDHAF2;	2	0	2	0	0	1	1	0	0	0	0	0	0	0	0	0	0	0	0	0
6	2	34810.7	34953.7	142.999	19.915	UHRF1BP1;TAF11;ANKS1A;	1	3	1	3	0	0	1	0	0	0	1	0	1	0	1	0	0	0	0	0
9	7	116224	116289	64.085	19.8747	RGS3;	3	0	3	0	0	1	0	1	0	1	0	0	0	0	0	0	0	0	0	0
12	7	65594.1	65677.5	83.327	19.8686	LEMD3;MSRB3;	0	0	0	0	0	0	0	0	0	0	0	0	0	0	0	0	0	0	0	0
22	4	38250.7	38347.3	96.536	19.8055	EIF3L;MICALL1;C22orf23;	2	0	2	0	0	1	0	1	0	0	0	0	0	0	0	0	0	0	0	0
14	0	44005.7	44015.7	9.993	19.7642	KRT8P2;	2	0	2	0	0	0	1	0	0	1	0	0	0	0	0	0	0	0	0	0
11	13	118234	118291	57.083	19.7144	UBE4A;RP11-770J1.5;ATP5L;RP11-770J1.7;	2	0	2	0	0	0	1	0	0	1	0	0	0	0	0	0	0	0	0	0
2	4	84250	84304.8	54.829	19.6694	AC016908.1;ST6GALNAC2P1;	2	0	2	0	0	0	1	0	0	1	0	0	0	0	0	0	0	0	0	0
6	7	64007.1	64034.5	27.34	19.5964	LGSN;	0	0	0	0	0	0	0	0	0	0	0	0	0	0	0	0	0	0	0	0
2	22	162288	162450	162.603	19.5746	SLC4A10;AC009487.6;snoU13;AC062022.1;KRT18P46;	3	0	3	0	0	0	1	1	0	1	0	0	0	0	0	0	0	0	0	0
8	11	106816	107066	250.747	19.5617	ZFPM2;ZFPM2-AS1;	1	0	1	0	0	0	0	0	0	1	0	0	0	0	0	0	0	0	0	0
2	2	55768.9	55870.8	101.944	19.5455	CFAP36;RP11-554J4.1;PNPT1;	3	2	3	2	0	1	1	0	0	1	0	0	0	1	1	0	0	0	0	0
16	5	62073.6	62112.2	38.645	19.5122	CDH8;	2	0	2	0	0	0	0	1	0	1	0	0	0	0	0	0	0	0	0	0
6	9	82014.6	82376.8	362.224	19.4737	FAM46A;RNA5SP210;	2	0	2	0	0	1	0	0	0	1	0	0	0	0	0	0	0	0	0	0
7	4	35144.5	35229.8	85.322	19.4372	DPY19L2P1;S100A11P2;	3	0	3	0	0	0	1	1	0	1	0	0	0	0	0	0	0	0	0	0
7	13	94295.1	94428.8	133.626	19.4279	PEG10;RPS3AP25;RNU6-956P;ATP5F1P2;GRPEL2P3;RN7SKP129;	2	0	2	0	0	0	1	0	0	1	0	0	0	0	0	0	0	0	0	0
15	1	50372.5	50491.6	119.043	19.4254	ATP8B4;SLC27A2;	1	0	1	0	0	0	1	0	0	0	0	0	0	0	0	0	0	0	0	0
18	1	41963	42019.4	56.333	19.4222	LINC01478;	2	0	2	0	0	0	1	1	0	0	0	0	0	0	0	0	0	0	0	0
14	1	55657.3	55679.7	22.374	19.37	DLGAP5;RP11-698F20.3;	4	0	4	0	0	1	1	1	0	1	0	0	0	0	0	0	0	0	0	0
20	2	37372.4	37562.3	189.902	19.3632	ACTR5;PPP1R16B;FAM83D;	4	0	4	0	0	1	1	1	0	1	0	0	0	0	0	0	0	0	0	0
3	7	89901.4	89938.6	37.257	19.3345		3	0	3	0	0	1	1	0	0	1	0	0	0	0	0	0	0	0	0	0
15	5	93498.1	93547.6	49.453	19.3185	CHD2;	1	2	1	0	2	0	1	0	0	0	0	0	0	0	0	0	1	0	1	0
1	6	66065	66109.1	44.124	19.2946	LEPR;	1	0	1	0	0	0	0	1	0	0	0	0	0	0	0	0	0	0	0	0
2	23	172620	172902	282.117	19.2545	SLC25A12;HAT1;METAP1D;	2	0	2	0	0	0	1	0	0	1	0	0	0	0	0	0	0	0	0	0
4	9	57204.8	57279.2	74.39	19.2354	AASDH;PPAT;	1	1	1	0	1	0	1	0	0	0	0	0	0	0	0	1	0	0	0	0
8	4	76362	76702.5	340.595	19.2261	HNF4G;	4	5	4	0	5	1	1	1	0	1	0	0	0	0	0	1	1	1	1	1
6	17	115543	115593	50.4	19.2041		2	0	2	0	0	0	1	0	0	1	0	0	0	0	0	0	0	0	0	0
1	3	41672.1	41748.4	76.341	19.1944	SCMH1;RP11-399E6.1;	2	0	2	0	0	0	1	0	0	1	0	0	0	0	0	0	0	0	0	0
16	6	69662.9	69912	249.088	19.1855	NFAT5;NQO1;WWP2;	3	0	3	0	0	1	0	1	0	1	0	0	0	0	0	0	0	0	0	0
16	4	47935	48372.5	437.506	19.1616	RP11-523L20.2;RP11-523L20.1;LONP2;	4	0	4	0	0	1	1	1	0	1	0	0	0	0	0	0	0	0	0	0
4	1	13363.5	13417.1	53.604	19.1595	RAB28;	4	0	4	0	0	1	1	1	0	1	0	0	0	0	0	0	0	0	0	0
9	4	95072.1	95533.7	461.626	19.106	NOL8;CENPP;OGN;RP11-476B13.2;BICD2;	3	0	3	0	0	1	1	1	0	0	0	0	0	0	0	0	0	0	0	0
2	19	155799	156088	288.305	19.0852	CBX3P6;AC092625.1;RNU6-1001P;	4	3	4	3	0	1	1	1	0	1	1	0	0	1	1	0	0	0	0	0
5	1	19147	19242	94.961	18.9942	RP11-124N3.3;HSPD1P15;	1	0	1	0	0	0	0	1	0	0	0	0	0	0	0	0	0	0	0	0
8	5	80562.3	80650.4	88.143	18.9776	STMN2;	2	0	2	0	0	1	0	0	0	1	0	0	0	0	0	0	0	0	0	0
8	7	95338.4	95428.6	90.163	18.9767	RPS4XP10;RAD54B;	3	0	3	0	0	1	1	0	0	1	0	0	0	0	0	0	0	0	0	0
14	4	84336.9	84337.1	0.168	18.9112		2	0	2	0	0	0	0	1	0	1	0	0	0	0	0	0	0	0	0	0
4	4	36305.9	36326.2	20.266	18.9051	DTHD1;	1	0	1	0	0	0	0	1	0	0	0	0	0	0	0	0	0	0	0	0
2	17	150564	150642	78.212	18.8824	AC144449.1;AC007364.1;	3	0	3	0	0	0	1	1	0	1	0	0	0	0	0	0	0	0	0	0
11	7	62310.9	62329.1	18.24	18.8626	AHNAK;EEF1G;	1	0	1	0	0	0	1	0	0	0	0	0	0	0	0	0	0	0	0	0
13	6	61026.8	61062.8	35.991	18.8013	TDRD3;	2	0	2	0	0	0	1	1	0	0	0	0	0	0	0	0	0	0	0	0
12	4	45610.8	45682.7	71.958	18.7892	ANO6;	1	0	1	0	0	0	0	1	0	0	0	0	0	0	0	0	0	0	0	0
9	9	134070	134115	45.271	18.7725	NUP214;	0	0	0	0	0	0	0	0	0	0	0	0	0	0	0	0	0	0	0	0
10	3	90152.9	90207.5	54.621	18.7604	RNLS;	0	0	0	0	0	0	0	0	0	0	0	0	0	0	0	0	0	0	0	0
7	2	28773.6	28843.2	69.648	18.7364	CREB5;	1	5	1	0	5	0	0	0	0	1	0	0	0	0	0	1	1	1	1	1
10	6	96893.2	96943.2	50.016	18.7294	RP11-310E22.5;PAWRP1;	0	0	0	0	0	0	0	0	0	0	0	0	0	0	0	0	0	0	0	0
18	3	49535.1	49609.1	74.05	18.6973		3	0	3	0	0	1	1	0	0	1	0	0	0	0	0	0	0	0	0	0
2	6	98949.1	99018.7	69.61	18.6805	AC092675.3;CNGA3;	2	0	2	0	0	1	0	0	0	1	0	0	0	0	0	0	0	0	0	0
6	14	97754	97761.8	7.842	18.6653		1	0	1	0	0	0	0	0	0	1	0	0	0	0	0	0	0	0	0	0
8	6	87271.8	87352.7	80.934	18.6518	SLC7A13;CTD-2284J15.1;WWP1;	0	0	0	0	0	0	0	0	0	0	0	0	0	0	0	0	0	0	0	0
2	28	187863	187937	73.893	18.6418	AC007319.1;	1	0	1	0	0	0	1	0	0	0	0	0	0	0	0	0	0	0	0	0
4	6	48262.5	48890.5	627.99	18.6303	TEC;SLAIN2;FRYL;OCIAD1;OCIAD2;	3	0	3	0	0	1	1	0	0	1	0	0	0	0	0	0	0	0	0	0
7	7	63930.3	63966.7	36.408	18.6026	ZNF680P1;HNRNPCP7;	1	0	1	0	0	0	1	0	0	0	0	0	0	0	0	0	0	0	0	0
10	7	101942	102309	366.967	18.5862	ERLIN1;CHUK;CWF19L1;HIF1AN;	2	0	2	0	0	1	0	0	0	1	0	0	0	0	0	0	0	0	0	0
12	3	39974.4	40023	48.621	18.5388	ABCD2;C12orf40;	0	0	0	0	0	0	0	0	0	0	0	0	0	0	0	0	0	0	0	0
7	15	114103	114144	40.443	18.5237	FOXP2;	0	0	0	0	0	0	0	0	0	0	0	0	0	0	0	0	0	0	0	0
4	19	133101	133149	47.688	18.5167		0	0	0	0	0	0	0	0	0	0	0	0	0	0	0	0	0	0	0	0
17	0	3499.57	3681.45	181.872	18.4854	RP11-235E17.2;SHPK;CTNS;TAX1BP3;ITGAE;	3	0	3	0	0	1	1	0	0	1	0	0	0	0	0	0	0	0	0	0
5	6	72158.4	72385.9	227.518	18.4586	TNPO1;FCHO2;	4	1	4	1	0	1	1	1	0	1	0	0	0	0	1	0	0	0	0	0
4	21	158288	158288	0	18.3423		2	1	2	1	0	0	1	0	0	1	0	1	0	0	0	0	0	0	0	0
1	13	150383	150449	65.686	18.3409	RPRD2;	1	0	1	0	0	0	0	1	0	0	0	0	0	0	0	0	0	0	0	0
3	14	178323	178416	92.783	18.3242	KCNMB2;	2	0	2	0	0	0	0	1	0	1	0	0	0	0	0	0	0	0	0	0
7	0	20387.7	20456.8	69.125	18.3158	ITGB8;	3	0	3	0	0	1	0	1	0	1	0	0	0	0	0	0	0	0	0	0
12	1	27237.4	27302	64.609	18.288	C12orf71;RP11-582E3.5;RP11-582E3.2;RP11-582E3.4;	2	0	2	0	0	1	0	0	0	1	0	0	0	0	0	0	0	0	0	0
4	22	161461	161510	48.212	18.2757	RP11-502M1.2;	0	0	0	0	0	0	0	0	0	0	0	0	0	0	0	0	0	0	0	0
2	8	111576	111668	91.63	18.2644	ACOXL;	1	0	1	0	0	0	1	0	0	0	0	0	0	0	0	0	0	0	0	0
12	8	76787.6	76873.3	85.714	18.2586	OSBPL8;	4	0	4	0	0	1	1	1	0	1	0	0	0	0	0	0	0	0	0	0
6	15	101891	101922	30.464	18.2527	GRIK2;	0	0	0	0	0	0	0	0	0	0	0	0	0	0	0	0	0	0	0	0
2	20	158015	158072	56.971	18.245	CDK7PS;	0	1	0	1	0	0	0	0	0	0	0	0	0	1	0	0	0	0	0	0
3	4	48267.8	48271	3.13	18.2341	CAMP;	1	0	1	0	0	0	0	1	0	0	0	0	0	0	0	0	0	0	0	0
1	1	39799.7	39831.3	31.652	18.214	MACF1;	1	0	1	0	0	0	1	0	0	0	0	0	0	0	0	0	0	0	0	0
19	2	21455.8	21499.8	43.996	18.1923	CTD-3030D20.1;VN1R83P;ZNF708;	1	0	1	0	0	0	0	0	0	1	0	0	0	0	0	0	0	0	0	0
7	1	23806.5	23867.1	60.58	18.1893	STK31;	3	0	3	0	0	1	1	0	0	1	0	0	0	0	0	0	0	0	0	0
15	2	73384.3	73809.6	425.287	18.1883	NEO1;REC114;	2	3	2	1	2	0	0	1	0	1	0	0	0	0	1	0	0	1	1	0
4	2	14992.5	15063.5	71.049	18.1864	CPEB2-AS1;	2	1	2	0	1	0	1	0	0	1	0	0	0	0	0	0	1	0	0	0
6	13	93592.4	93603	10.566	18.1553	ATF1P1;	0	4	0	0	4	0	0	0	0	0	0	0	0	0	0	1	1	0	1	1
3	6	85035.3	85060.5	25.18	18.1499	CADM2;	0	0	0	0	0	0	0	0	0	0	0	0	0	0	0	0	0	0	0	0
1	21	226327	226354	26.132	18.1099	ACBD3;	1	0	1	0	0	0	1	0	0	0	0	0	0	0	0	0	0	0	0	0
5	4	52906.2	53027	120.739	18.0772	NDUFS4;	2	2	2	2	0	0	1	1	0	0	0	0	0	1	1	0	0	0	0	0
10	0	32881.9	33257.2	375.309	18.0665	AL356053.1;ITGB1;RP11-462L8.1;	1	7	1	2	5	0	1	0	0	0	0	1	1	0	0	1	1	1	1	1
1	12	145675	145691	16.484	17.9713		2	0	2	0	0	1	0	1	0	0	0	0	0	0	0	0	0	0	0	0
1	7	87044.6	87111.6	67.011	17.9383	CLCA4;RP4-651E10.4;CLCA3P;	1	0	1	0	0	0	1	0	0	0	0	0	0	0	0	0	0	0	0	0
15	4	82558.8	82573.8	15.031	17.9045	SAXO2;	2	0	2	0	0	1	1	0	0	0	0	0	0	0	0	0	0	0	0	0
2	3	72966.6	73032.7	66.178	17.9024	EXOC6B;	1	0	1	0	0	0	1	0	0	0	0	0	0	0	0	0	0	0	0	0
4	12	87915	88169	253.994	17.8522	AFF1;KLHL8;	0	0	0	0	0	0	0	0	0	0	0	0	0	0	0	0	0	0	0	0
11	15	128870	128903	33.887	17.8239	ARHGAP32;	0	0	0	0	0	0	0	0	0	0	0	0	0	0	0	0	0	0	0	0
3	12	160467	160557	90.644	17.7734	RP11-16N11.2;PPM1L;	2	0	2	0	0	0	0	1	0	1	0	0	0	0	0	0	0	0	0	0
1	5	60280.5	60288.7	8.211	17.6569	HOOK1;	2	4	2	0	4	0	1	0	0	1	0	0	0	0	0	1	1	1	0	1
7	10	74058.3	74122.9	64.565	17.6521		3	5	3	0	5	1	1	0	0	1	0	0	0	0	0	1	1	1	1	1
1	16	202648	202666	17.034	17.5656	SYT2;	2	0	2	0	0	1	0	1	0	0	0	0	0	0	0	0	0	0	0	0
11	4	51436.9	51455.3	18.377	17.5505	OR4A8;OR4A2P;	1	0	1	0	0	0	1	0	0	0	0	0	0	0	0	0	0	0	0	0
9	3	87169.1	87222.7	53.613	17.5097	RP11-361M4.1;	0	0	0	0	0	0	0	0	0	0	0	0	0	0	0	0	0	0	0	0
22	2	32029.7	32094	64.388	17.5019	PISD;PRR14L;	1	0	1	0	0	0	0	0	0	1	0	0	0	0	0	0	0	0	0	0
12	6	51022.9	51036.8	13.933	17.4349	DIP2B;	0	0	0	0	0	0	0	0	0	0	0	0	0	0	0	0	0	0	0	0
10	1	52559.8	52572.6	12.797	17.4266	A1CF;	1	0	1	0	0	1	0	0	0	0	0	0	0	0	0	0	0	0	0	0
11	8	71216.9	71234.1	17.253	17.4003	NADSYN1;RP11-684B2.3;KRTAP5-7;	1	0	1	0	0	0	0	0	0	1	0	0	0	0	0	0	0	0	0	0
8	0	37960.3	37977.7	17.414	17.3929	ASH2L;	4	0	4	0	0	1	1	1	0	1	0	0	0	0	0	0	0	0	0	0
1	15	201808	201815	7.238	17.3424	IPO9;	1	0	1	0	0	1	0	0	0	0	0	0	0	0	0	0	0	0	0	0
8	2	67740.8	67767.7	26.913	17.3236	SGK3;	1	0	1	0	0	0	0	0	0	1	0	0	0	0	0	0	0	0	0	0
13	1	45748	45764.3	16.335	17.2922	GTF2F2;	0	0	0	0	0	0	0	0	0	0	0	0	0	0	0	0	0	0	0	0
8	8	97829.4	97848.7	19.354	17.267	CPQ;	0	0	0	0	0	0	0	0	0	0	0	0	0	0	0	0	0	0	0	0
10	9	122796	122859	62.995	17.2567		1	0	1	0	0	0	0	1	0	0	0	0	0	0	0	0	0	0	0	0
18	2	46736.3	46770.1	33.827	17.2362	DYM;	2	0	2	0	0	1	0	1	0	0	0	0	0	0	0	0	0	0	0	0
2	11	120574	120581	7.172	17.2342	PTPN4;	2	0	2	0	0	1	0	0	0	1	0	0	0	0	0	0	0	0	0	0
4	11	66003.8	66015.6	11.76	17.2332	EFTUD1P2;	0	0	0	0	0	0	0	0	0	0	0	0	0	0	0	0	0	0	0	0
2	15	144442	144457	14.466	17.1784	ARHGAP15;	3	0	3	0	0	1	0	1	0	1	0	0	0	0	0	0	0	0	0	0
5	9	122175	122191	15.888	17.167	SNX24;	1	0	1	0	0	0	1	0	0	0	0	0	0	0	0	0	0	0	0	0
3	11	153972	153995	22.737	17.1587	ARHGEF26;DHX36;	0	0	0	0	0	0	0	0	0	0	0	0	0	0	0	0	0	0	0	0
12	0	15945.8	15956.6	10.82	17.1419	EPS8;RP11-6B19.3;	0	0	0	0	0	0	0	0	0	0	0	0	0	0	0	0	0	0	0	0
1	4	51643.7	51685.9	42.243	17.0963	LINC01562;	3	0	3	0	0	1	1	1	0	0	0	0	0	0	0	0	0	0	0	0
17	2	50703.9	50703.9	0	17.0941		0	0	0	0	0	0	0	0	0	0	0	0	0	0	0	0	0	0	0	0
9	1	11934.1	11934.3	0.196	17.0872		2	0	2	0	0	1	0	0	0	1	0	0	0	0	0	0	0	0	0	0
1	22	242493	242511	18.089	17.0689	PLD5;	0	0	0	0	0	0	0	0	0	0	0	0	0	0	0	0	0	0	0	0
9	6	115059	115074	15.073	17.0606	PTBP3;	2	0	2	0	0	0	1	1	0	0	0	0	0	0	0	0	0	0	0	0
22	0	17178.7	17225.3	46.635	17.0601	VWFP1;AC005301.8;	0	0	0	0	0	0	0	0	0	0	0	0	0	0	0	0	0	0	0	0
2	36	214373	214404	30.752	17.0513	SPAG16;	2	0	2	0	0	0	1	1	0	0	0	0	0	0	0	0	0	0	0	0
11	14	126139	126150	10.551	17.0393	FOXRED1;TIRAP;	2	2	2	2	0	1	1	0	0	0	1	0	0	0	1	0	0	0	0	0
3	9	104877	104877	0.005	17.0013		1	0	1	0	0	0	0	0	0	1	0	0	0	0	0	0	0	0	0	0
2	31	199910	199933	22.782	16.991	AC018717.1;	0	0	0	0	0	0	0	0	0	0	0	0	0	0	0	0	0	0	0	0
6	8	75099.7	75108.2	8.442	16.9525	RP11-554D15.1;	2	0	2	0	0	0	1	1	0	0	0	0	0	0	0	0	0	0	0	0
8	12	109263	109286	22.336	16.9503	EIF3E;	1	0	1	0	0	0	1	0	0	0	0	0	0	0	0	0	0	0	0	0
8	13	112053	112054	0.182	16.9213		3	0	3	0	0	1	1	0	0	1	0	0	0	0	0	0	0	0	0	0
7	6	49334.5	49334.5	0	16.9024		1	0	1	0	0	0	0	1	0	0	0	0	0	0	0	0	0	0	0	0
2	37	215060	215060	0	16.9021		0	0	0	0	0	0	0	0	0	0	0	0	0	0	0	0	0	0	0	0
4	23	168129	168137	8.436	16.8881	SPOCK3;	3	0	3	0	0	1	0	1	0	1	0	0	0	0	0	0	0	0	0	0
2	21	160096	160139	42.344	16.8786	WDSUB1;	0	0	0	0	0	0	0	0	0	0	0	0	0	0	0	0	0	0	0	0
19	5	42725.8	42725.8	0	16.8771		0	0	0	0	0	0	0	0	0	0	0	0	0	0	0	0	0	0	0	0
10	5	96238.3	96251.4	13.114	16.8596	TBC1D12;	1	0	1	0	0	1	0	0	0	0	0	0	0	0	0	0	0	0	0	0
5	11	138607	138610	2.162	16.8143	SNORA74A;	1	0	1	0	0	0	1	0	0	0	0	0	0	0	0	0	0	0	0	0
6	22	164820	164825	4.78	16.813		1	0	1	0	0	0	0	0	0	1	0	0	0	0	0	0	0	0	0	0
4	20	147065	147065	0	16.8009		1	0	1	0	0	0	0	0	0	1	0	0	0	0	0	0	0	0	0	0
19	1	19554.8	19568.7	13.856	16.8004	GATAD2A;	0	1	0	1	0	0	0	0	0	0	0	1	0	0	0	0	0	0	0	0
6	10	83041	83041.6	0.666	16.7831		0	0	0	0	0	0	0	0	0	0	0	0	0	0	0	0	0	0	0	0
7	18	133531	133531	0.036	16.7605	EXOC4;	0	0	0	0	0	0	0	0	0	0	0	0	0	0	0	0	0	0	0	0
22	1	24551.9	24551.9	0	16.7584		0	0	0	0	0	0	0	0	0	0	0	0	0	0	0	0	0	0	0	0
1	2	41122	41131.4	9.369	16.7515	RIMS3;	2	0	2	0	0	1	0	0	0	1	0	0	0	0	0	0	0	0	0	0
2	13	134472	134476	4.12	16.7495		1	0	1	0	0	0	1	0	0	0	0	0	0	0	0	0	0	0	0	0
16	0	14665.5	14667	1.523	16.7491	PARN;	4	0	4	0	0	1	1	1	0	1	0	0	0	0	0	0	0	0	0	0
5	0	15700.5	15726.2	25.676	16.7427	FBXL7;	2	0	2	0	0	1	1	0	0	0	0	0	0	0	0	0	0	0	0	0
13	10	94646.5	94653.9	7.403	16.7289	GPC6;	0	0	0	0	0	0	0	0	0	0	0	0	0	0	0	0	0	0	0	0
3	2	38191.4	38191.4	0	16.7028		0	0	0	0	0	0	0	0	0	0	0	0	0	0	0	0	0	0	0	0
6	20	138193	138199	6.656	16.7021	TNFAIP3;	1	0	1	0	0	0	0	1	0	0	0	0	0	0	0	0	0	0	0	0
11	10	88797.2	88798.5	1.314	16.6986	GRM5;	0	3	0	3	0	0	0	0	0	0	0	0	1	1	1	0	0	0	0	0
6	0	30957.4	30969.9	12.542	16.6985	MUC21;	0	0	0	0	0	0	0	0	0	0	0	0	0	0	0	0	0	0	0	0
6	3	46367.9	46367.9	0	16.6946		0	0	0	0	0	0	0	0	0	0	0	0	0	0	0	0	0	0	0	0
6	18	122803	122813	9.959	16.6892	PKIB;	3	0	3	0	0	1	1	0	0	1	0	0	0	0	0	0	0	0	0	0
8	9	100736	100747	11.123	16.6822	VPS13B;	1	0	1	0	0	1	0	0	0	0	0	0	0	0	0	0	0	0	0	0
8	10	104293	104293	0	16.675		0	0	0	0	0	0	0	0	0	0	0	0	0	0	0	0	0	0	0	0
2	25	175972	175972	0.948	16.6441	ATF2;	2	4	2	4	0	0	0	1	0	1	1	1	1	1	0	0	0	0	0	0
2	10	115480	115480	0	16.6439		0	0	0	0	0	0	0	0	0	0	0	0	0	0	0	0	0	0	0	0
1	0	33506.3	33506.3	0	16.6179		1	0	1	0	0	0	1	0	0	0	0	0	0	0	0	0	0	0	0	0
11	9	85207.9	85209.2	1.258	16.6138	DLG2;	1	0	1	0	0	0	0	1	0	0	0	0	0	0	0	0	0	0	0	0
6	4	47939.4	47939.4	0	16.6028		0	0	0	0	0	0	0	0	0	0	0	0	0	0	0	0	0	0	0	0
7	14	97046.8	97046.8	0	16.6015		0	0	0	0	0	0	0	0	0	0	0	0	0	0	0	0	0	0	0	0
2	18	152104	152104	0	16.5834		1	0	1	0	0	0	1	0	0	0	0	0	0	0	0	0	0	0	0	0
7	3	30048.9	30048.9	0	16.5829		0	2	0	0	2	0	0	0	0	0	0	0	0	0	0	1	0	0	0	1
2	33	201721	201721	0	16.5697		1	0	1	0	0	0	0	1	0	0	0	0	0	0	0	0	0	0	0	0
6	21	158698	158734	35.309	16.5572	TULP4;	3	0	3	0	0	1	1	0	0	1	0	0	0	0	0	0	0	0	0	0

## Sheet: AFR-YRI
Chrsme	Block	Begin	End	Size (Kb)	max CSS	Genes	wth_sharing	btw_sharing	AFR_sharing	EUR_sharing	ASI_sharing	Share_ESN	Share_GWD	Share_LWK	Share_MSL	Share_YRI	Share_CEU	Share_FIN	Share_GBR	Share_IBS	Share_TSI	Share_CDX	Share_CHB	Share_CHS	Share_JPT	Share_KHV
22	3	36000.9	36424.7	423.76	41.57	MB;CITF22-62D4.1;APOL6;RBFOX2;	4	0	4	0	0	1	1	1	1	0	0	0	0	0	0	0	0	0	0	0
4	10	53494.2	53622.5	128.29	37.2311	USP46;USP46-AS1;RP11-177B4.2;DANCR;ERVMER34-1;	4	0	4	0	0	1	1	1	1	0	0	0	0	0	0	0	0	0	0	0
7	9	69022.8	69828.7	805.961	35.2642	RP5-942I16.1;AUTS2;	4	1	4	1	0	1	1	1	1	0	0	0	0	1	0	0	0	0	0	0
12	5	79501	80334.5	833.544	33.869	SYT1;RP1-78O14.1;RP11-359M6.2;RP11-359M6.1;NOP56P3;PAWR;RP11-530C5.1;PPP1R12A;RP11-84G21.1;	4	3	4	3	0	1	1	1	1	0	0	0	1	1	1	0	0	0	0	0
19	3	37537.8	39199.4	1661.55	33.1893	ZNF420;HKR1;ZNF527;ZNF569;ZNF540;ZNF571;ZFP30;ZNF573;CTD-2554C21.1;CTD-2554C21.2;AC016582.2;WDR87;SIPA1L3;PPP1R14A;SPINT2;CTB-102L5.4;C19orf33;YIF1B;KCNK6;CATSPERG;PSMD8;GGN;SPRED3;FAM98C;RASGRP4;RYR1;MAP4K1;EIF3K;ACTN4;	4	5	4	0	5	1	1	1	1	0	0	0	0	0	0	1	1	1	1	1
10	8	104571	105002	430.361	32.9431	WBP1L;CYP17A1;PFN1P11;BORCS7;AS3MT;RP11-724N1.1;CNNM2;NT5C2;ST13P13;RPEL1;	4	0	4	0	0	1	1	1	1	0	0	0	0	0	0	0	0	0	0	0
11	6	59281.9	59582.2	300.332	31.8039	OR4D9;OR4D7P;AP000442.4;OSBP;AP000442.1;PATL1;AP000640.2;RN7SKP192;OR10V1;STX3;OR10Y1P;OR10V3P;OR10V2P;MRPL16;	3	0	3	0	0	1	1	0	1	0	0	0	0	0	0	0	0	0	0	0
10	7	101963	102324	361.031	31.5785	CHUK;CWF19L1;SCD;OLMALINC;RP11-1029J19.5;Y_RNA;RP11-285F16.1;WNT8B;SEC31B;NDUFB8;HIF1AN;	2	0	2	0	0	1	0	0	1	0	0	0	0	0	0	0	0	0	0	0
21	0	30684.4	30823.3	138.9	31.3802	BACH1;BACH1-IT1;BACH1-IT2;	3	0	3	0	0	1	1	1	0	0	0	0	0	0	0	0	0	0	0	0
2	22	182091	182693	602.659	30.4476	AC104820.2;AC020595.1;ITGA4;RNU6ATAC19P;	4	0	4	0	0	1	1	1	1	0	0	0	0	0	0	0	0	0	0	0
4	2	13296.7	13490.7	193.978	29.9838	HSP90AB2P;RAB28;	4	0	4	0	0	1	1	1	1	0	0	0	0	0	0	0	0	0	0	0
4	16	107755	107790	35.213	29.8788	ACTR6P1;	4	0	4	0	0	1	1	1	1	0	0	0	0	0	0	0	0	0	0	0
9	5	116196	116335	138.748	29.8702	RGS3;	3	0	3	0	0	1	0	1	1	0	0	0	0	0	0	0	0	0	0	0
20	3	34198.3	34601.2	402.914	29.4432	SPAG4;CPNE1;RBM12;NFS1;PHF20;LL22NC03-86D4.1;SCAND1;CNBD2;	4	10	4	5	5	1	1	1	1	0	1	1	1	1	1	1	1	1	1	1
12	8	87468.7	87568.5	99.857	29.2197	RPL23AP68;	4	0	4	0	0	1	1	1	1	0	0	0	0	0	0	0	0	0	0	0
1	11	160909	161180	271.301	29.1544	RP11-544M22.1;ITLN2;F11R;RP11-544M22.13;TSTD1;USF1;ARHGAP30;NECTIN4;PFDN2;DEDD;ACA64;UFC1;USP21;PPOX;B4GALT3;ADAMTS4;NDUFS2;	4	0	4	0	0	1	1	1	1	0	0	0	0	0	0	0	0	0	0	0
3	3	45862.8	46408.3	545.501	29.1405	LZTFL1;FYCO1;CXCR6;XCR1;FLT1P1;CCR3;CCR1;CCR2;CCR5;	3	0	3	0	0	1	1	0	1	0	0	0	0	0	0	0	0	0	0	0
4	9	52845.9	52927.2	81.321	28.8216	RP11-61F5.1;LRRC66;SGCB;RP11-535C7.1;SPATA18;	4	0	4	0	0	1	1	1	1	0	0	0	0	0	0	0	0	0	0	0
20	4	37352.1	37565.3	213.223	28.7414	SLC32A1;ACTR5;PPP1R16B;FAM83D;	4	0	4	0	0	1	1	1	1	0	0	0	0	0	0	0	0	0	0	0
15	1	44560.9	44967.8	406.944	28.6528	Metazoa_SRP;CASC4;CTDSPL2;EIF3J;SPG11;PATL2;	4	0	4	0	0	1	1	1	1	0	0	0	0	0	0	0	0	0	0	0
13	2	48617.7	48740.2	122.424	28.2393	NUDT15;MED4;POLR2KP2;	4	0	4	0	0	1	1	1	1	0	0	0	0	0	0	0	0	0	0	0
1	14	223277	223382	104.956	28.0292	TLR5;RP11-239E10.2;RP11-239E10.3;	4	0	4	0	0	1	1	1	1	0	0	0	0	0	0	0	0	0	0	0
8	24	121996	122110	114.418	27.7164	RP11-369K17.1;	4	0	4	0	0	1	1	1	1	0	0	0	0	0	0	0	0	0	0	0
7	7	45580	45722.9	142.903	27.6772	AC073325.1;ADCY1;	3	0	3	0	0	1	1	1	0	0	0	0	0	0	0	0	0	0	0	0
6	1	31887.1	33794.6	1907.58	27.5587	C2;XXbac-BPG116M5.17;NELFE;SKIV2L;DXO;STK19;C4A;C4B;HLA-DRA;HLA-DRB9;HLA-DRB5;RNU1-61P;HLA-DRB6;HLA-DRB1;HLA-DQA1;HLA-DPB2;HLA-DPA3;HCG24;COL11A2;RXRB;SLC39A7;HSD17B8;RING1;ZNF70P1;KIFC1;ITPR3;UQCC2;IP6K3;LEMD2;MLN;	4	5	4	2	3	1	1	1	1	0	1	1	0	0	0	1	0	0	1	1
16	1	14586.8	15796.3	1209.5	27.5131	PARN;BFAR;PLA2G10;PDXDC1;NTAN1;RRN3;NDE1;	4	0	4	0	0	1	1	1	1	0	0	0	0	0	0	0	0	0	0	0
16	2	22935.9	23168.6	232.753	27.4513	RP11-20G6.2;USP31;	4	0	4	0	0	1	1	1	1	0	0	0	0	0	0	0	0	0	0	0
2	28	207141	207286	145.003	27.4282	ZDBF2;AC017081.2;HNRNPA1P51;	4	0	4	0	0	1	1	1	1	0	0	0	0	0	0	0	0	0	0	0
2	4	85165.8	85267.4	101.605	26.8262	KCMF1;	1	0	1	0	0	1	0	0	0	0	0	0	0	0	0	0	0	0	0	0
4	14	99933.5	100201	267.026	26.6858	METAP1;ADH6;RP11-696N14.1;ADH1A;	1	5	1	0	5	1	0	0	0	0	0	0	0	0	0	1	1	1	1	1
1	8	101326	101518	191.594	26.5782	EXTL2;SLC30A7;DPH5;RP11-421L21.3;	4	0	4	0	0	1	1	1	1	0	0	0	0	0	0	0	0	0	0	0
8	4	49134	50244.4	1110.47	26.2744	CTD-2210A23.1;RNU6-295P;RP11-770E5.1;EFCAB1;RP11-10H3.1;RN7SKP294;	3	2	3	2	0	1	1	1	0	0	0	1	1	0	0	0	0	0	0	0
15	4	77359.5	77841.8	482.327	26.2199	TSPAN3;PEAK1;HMG20A;RP11-307C19.1;	4	0	4	0	0	1	1	1	1	0	0	0	0	0	0	0	0	0	0	0
11	1	16053.7	16186.4	132.694	26.1128	SOX6;	3	0	3	0	0	0	1	1	1	0	0	0	0	0	0	0	0	0	0	0
4	0	206.445	302.934	96.489	25.8308	ZNF876P;RP11-478C6.6;ZNF732;	4	0	4	0	0	1	1	1	1	0	0	0	0	0	0	0	0	0	0	0
3	22	178284	178419	134.991	25.8058	KCNMB2;	2	0	2	0	0	0	0	1	1	0	0	0	0	0	0	0	0	0	0	0
2	6	98846.2	99265.6	419.411	25.8041	VWA3B;AC092675.3;CNGA3;INPP4A;COA5;UNC50;MGAT4A;	3	0	3	0	0	1	1	0	1	0	0	0	0	0	0	0	0	0	0	0
1	1	41104.7	41715.3	610.628	25.759	RIMS3;RP4-739H11.3;NFYC;SCMH1;RP11-399E6.1;	3	2	3	2	0	1	1	0	1	0	0	0	1	1	0	0	0	0	0	0
2	16	155796	156088	291.61	25.6851	CBX3P6;AC092625.1;RNU6-1001P;	4	3	4	3	0	1	1	1	1	0	1	0	0	1	1	0	0	0	0	0
1	9	113897	114377	480.276	25.5467	MAGI3;PHTF1;RSBN1;PTPN22;	4	0	4	0	0	1	1	1	1	0	0	0	0	0	0	0	0	0	0	0
7	14	91775.1	92223.4	448.318	25.3598	LRRD1;CYP51A1-AS1;KRIT1;ANKIB1;ERVW-1;AC007566.10;PEX1;RBM48;FAM133B;	3	0	3	0	0	1	1	1	0	0	0	0	0	0	0	0	0	0	0	0
4	4	19461.3	19594.1	132.757	25.1518	RP11-608O21.1;	4	0	4	0	0	1	1	1	1	0	0	0	0	0	0	0	0	0	0	0
4	21	130640	130727	86.36	24.719	RP11-519M16.1;RP11-422J15.1;	3	0	3	0	0	1	0	1	1	0	0	0	0	0	0	0	0	0	0	0
6	14	122744	122850	106.9	24.6628	HSF2;SERINC1;PKIB;	3	1	3	1	0	1	1	0	1	0	1	0	0	0	0	0	0	0	0	0
9	4	100561	100764	202.743	24.5297	PTCSC2;FOXE1;TRMO;HEMGN;ANP32B;	4	0	4	0	0	1	1	1	1	0	0	0	0	0	0	0	0	0	0	0
6	4	70399.9	71228.9	828.985	24.486	LMBRD1;COL19A1;COL9A1;FAM135A;	3	1	3	0	1	1	1	1	0	0	0	0	0	0	0	0	0	0	0	1
7	2	20371.8	20460.4	88.614	24.4062	ITGB8;	3	0	3	0	0	1	0	1	1	0	0	0	0	0	0	0	0	0	0	0
7	13	87290.9	87747.8	456.923	24.3905	ABCB1;RUNDC3B;ADAM22;	2	0	2	0	0	0	1	0	1	0	0	0	0	0	0	0	0	0	0	0
13	6	57435.4	58252	816.541	24.3656	PRR20A;PRR20FP;MTCO2P3;SLC25A5P4;RPL31P53;PCDH17;	4	1	4	0	1	1	1	1	1	0	0	0	0	0	0	0	1	0	0	0
10	3	91316.8	91423.6	106.79	24.1696	SLC16A12;PANK1;RP11-80H5.6;RP11-80H5.9;	4	0	4	0	0	1	1	1	1	0	0	0	0	0	0	0	0	0	0	0
2	26	194592	195078	486.042	24.1598	AC074290.1;AC068135.1;GLULP6;HNRNPA1P47;	4	0	4	0	0	1	1	1	1	0	0	0	0	0	0	0	0	0	0	0
1	15	225716	225760	43.592	24.1287	ENAH;	4	0	4	0	0	1	1	1	1	0	0	0	0	0	0	0	0	0	0	0
10	0	38108.2	38435.6	327.466	23.9471	ZNF248;ZNF37CP;ZNF33CP;ZNF25;RP11-393J16.4;Y_RNA;ZNF33A;EIF3LP3;FXYD6P2;ZNF37A;RP11-508N22.12;	2	0	2	0	0	1	0	1	0	0	0	0	0	0	0	0	0	0	0	0
13	10	76225.2	76342.9	117.711	23.8709	RP11-29G8.3;LMO7;	4	0	4	0	0	1	1	1	1	0	0	0	0	0	0	0	0	0	0	0
16	4	47925.6	48429.2	503.614	23.8161	RP11-523L20.2;RP11-523L20.1;LONP2;SIAH1;	4	0	4	0	0	1	1	1	1	0	0	0	0	0	0	0	0	0	0	0
7	10	74058.3	74160.4	102.155	23.6898		3	5	3	0	5	1	1	0	1	0	0	0	0	0	0	1	1	1	1	1
3	5	47969.7	48086.3	116.587	23.5555	MAP4;	3	0	3	0	0	1	1	1	0	0	0	0	0	0	0	0	0	0	0	0
9	1	74483.6	74585.9	102.264	23.3425	ABHD17B;C9orf85;	4	0	4	0	0	1	1	1	1	0	0	0	0	0	0	0	0	0	0	0
3	7	69820.8	69939.1	118.269	23.2117	MITF;	3	0	3	0	0	1	1	1	0	0	0	0	0	0	0	0	0	0	0	0
7	6	40782	40904.7	122.646	23.2005	SUGCT;	1	0	1	0	0	1	0	0	0	0	0	0	0	0	0	0	0	0	0	0
4	24	148079	148123	43.68	23.0402		2	0	2	0	0	1	0	1	0	0	0	0	0	0	0	0	0	0	0	0
22	1	31998.6	32528.4	529.83	23.0043	SFI1;PISD;PRR14L;SLC5A1;AP1B1P1;	1	2	1	2	0	0	0	0	1	0	0	0	0	1	1	0	0	0	0	0
22	0	30302	31406.3	1104.25	22.8938	MTMR3;HORMAD2;TBC1D10A;SF3A1;CCDC157;RNF215;SEC14L2;RP4-539M6.19;SEC14L6;DUSP18;OSBP2;MORC2-AS1;TUG1;RP3-430N8.11;	2	2	2	2	0	1	1	0	0	0	1	0	0	1	0	0	0	0	0	0
8	8	63560.9	63711.3	150.447	22.8702	NKAIN3;	1	1	1	1	0	1	0	0	0	0	0	0	0	0	1	0	0	0	0	0
7	8	65351.5	65422.5	71.01	22.8645	VKORC1L1;	1	0	1	0	0	0	0	1	0	0	0	0	0	0	0	0	0	0	0	0
3	18	147786	147877	91.062	22.7963	RP11-639B1.1;RP11-501O2.1;RP11-501O2.3;	1	0	1	0	0	0	1	0	0	0	0	0	0	0	0	0	0	0	0	0
7	18	132625	132736	111.084	22.7426	CHCHD3;	2	2	2	2	0	1	0	0	1	0	1	0	1	0	0	0	0	0	0	0
7	11	79905.3	80693.7	788.408	22.6879	AC003988.1;RN7SL35P;AC004862.6;CD36;SEMA3C;	0	0	0	0	0	0	0	0	0	0	0	0	0	0	0	0	0	0	0	0
17	0	3486.19	3710.77	224.577	22.5797	RP11-235E17.2;SHPK;CTNS;TAX1BP3;P2RX5;ITGAE;NCBP3;	3	0	3	0	0	1	1	0	1	0	0	0	0	0	0	0	0	0	0	0
6	8	83739.2	83846.1	106.986	22.5711	UBE3D;DOPEY1;	3	5	3	0	5	1	1	0	1	0	0	0	0	0	0	1	1	1	1	1
8	2	38682.5	38749.8	67.29	22.5697	TACC1;	3	0	3	0	0	1	1	1	0	0	0	0	0	0	0	0	0	0	0	0
5	8	87481.6	87880.6	398.998	22.5124	TMEM161B;TMEM161B-AS1;LINC00461;	4	0	4	0	0	1	1	1	1	0	0	0	0	0	0	0	0	0	0	0
8	14	88797.5	89348.6	551.037	22.4836	SOX5P1;DCAF4L2;MMP16;RP11-586K2.1;	2	1	2	0	1	1	1	0	0	0	0	0	0	0	0	0	0	0	1	0
12	6	82066.6	82158.1	91.521	22.4776	PPFIA2;	4	0	4	0	0	1	1	1	1	0	0	0	0	0	0	0	0	0	0	0
2	25	193566	193806	240.042	22.4665	PCGEM1;	4	0	4	0	0	1	1	1	1	0	0	0	0	0	0	0	0	0	0	0
6	10	87434.9	87748.7	313.833	22.4157	RP1-253B10.1;HTR1E;	4	0	4	0	0	1	1	1	1	0	0	0	0	0	0	0	0	0	0	0
13	5	55613.7	55637.1	23.335	22.376		2	0	2	0	0	1	0	0	1	0	0	0	0	0	0	0	0	0	0	0
9	0	11821.7	11934.3	112.674	22.1332		2	0	2	0	0	1	0	0	1	0	0	0	0	0	0	0	0	0	0	0
10	5	96644	96734.7	90.7	22.1216	RP11-400G3.3;CYP2C9;	0	0	0	0	0	0	0	0	0	0	0	0	0	0	0	0	0	0	0	0
3	15	120018	120317	298.748	22.0824	RP11-174O3.1;LRRC58;RP11-174O3.3;RP11-174O3.4;FSTL1;RP11-359H3.1;NDUFB4;	4	0	4	0	0	1	1	1	1	0	0	0	0	0	0	0	0	0	0	0
5	2	43455.2	44239.8	784.568	22.0793	TMEM267;NNT;RP11-8L21.1;	4	6	4	3	3	1	1	1	1	0	0	1	0	1	1	1	1	1	0	0
4	29	181028	181125	96.953	22.0264		3	0	3	0	0	0	1	1	1	0	0	0	0	0	0	0	0	0	0	0
2	18	162383	162448	64.966	21.9428	SLC4A10;AC062022.1;KRT18P46;	1	0	1	0	0	0	0	0	1	0	0	0	0	0	0	0	0	0	0	0
14	6	61121	61226.4	105.429	21.8816	SIX1;SIX4;MNAT1;	4	0	4	0	0	1	1	1	1	0	0	0	0	0	0	0	0	0	0	0
3	21	163884	163904	19.907	21.8611	MIR1263;	4	0	4	0	0	1	1	1	1	0	0	0	0	0	0	0	0	0	0	0
4	22	142486	142576	89.914	21.7589	IL15;	1	0	1	0	0	0	0	1	0	0	0	0	0	0	0	0	0	0	0	0
13	8	68406.8	68429.9	23.183	21.757	NPM1P22;	2	0	2	0	0	1	0	0	1	0	0	0	0	0	0	0	0	0	0	0
22	2	33986.5	34426.2	439.643	21.7407	LARGE1;LL22NC03-86D4.1;	1	0	1	0	0	1	0	0	0	0	0	0	0	0	0	0	0	0	0	0
11	2	27733.9	27831.8	97.952	21.7276	RP11-587D21.4;	2	0	2	0	0	1	0	0	1	0	0	0	0	0	0	0	0	0	0	0
8	0	27088.4	27181.9	93.514	21.7063	STMN4;TRIM35;PTK2B;	1	0	1	0	0	1	0	0	0	0	0	0	0	0	0	0	0	0	0	0
16	3	34402.2	34523.3	121.154	21.6693	SLC25A1P4;RP11-244B22.7;RP11-488I20.9;RP11-488I20.8;FGFR3P5;AGGF1P8;	3	0	3	0	0	0	1	1	1	0	0	0	0	0	0	0	0	0	0	0
4	12	87606	87698	92.083	21.6151	PTPN13;	3	0	3	0	0	1	1	1	0	0	0	0	0	0	0	0	0	0	0	0
6	5	72762.4	72855.8	93.45	21.6022	RIMS1;	3	0	3	0	0	1	1	1	0	0	0	0	0	0	0	0	0	0	0	0
3	6	50391.5	50825.3	433.835	21.5822	CACNA2D2;CISH;MAPKAPK3;RP11-804H8.6;DOCK3;	4	0	4	0	0	1	1	1	1	0	0	0	0	0	0	0	0	0	0	0
5	7	86508	86979.5	471.456	21.5635	CTC-242N15.1;RASA1;CTD-2316B1.1;	4	0	4	0	0	1	1	1	1	0	0	0	0	0	0	0	0	0	0	0
18	6	77605.2	77686.4	81.195	21.4771	KCNG2;PQLC1;	0	0	0	0	0	0	0	0	0	0	0	0	0	0	0	0	0	0	0	0
2	27	200633	201215	581.759	21.3235	FTCDNL1;AC108032.1;AC073043.1;TYW5;SPATS2L;	4	1	4	1	0	1	1	1	1	0	0	0	1	0	0	0	0	0	0	0
10	6	100919	101001	81.271	21.2239	HPSE2;	2	0	2	0	0	1	0	1	0	0	0	0	0	0	0	0	0	0	0	0
6	3	62707.8	62810.8	103.022	21.0053	KHDRBS2;	3	0	3	0	0	0	1	1	1	0	0	0	0	0	0	0	0	0	0	0
11	12	110584	110704	120.579	20.9991	ARHGAP20;HNRNPA1P60;	4	0	4	0	0	1	1	1	1	0	0	0	0	0	0	0	0	0	0	0
8	18	110248	110347	99.028	20.9886	NUDCD1;ENY2;	0	0	0	0	0	0	0	0	0	0	0	0	0	0	0	0	0	0	0	0
11	4	38551.9	38700	148.068	20.9155	RP11-277K23.1;LINC01493;	3	0	3	0	0	1	1	0	1	0	0	0	0	0	0	0	0	0	0	0
8	20	113440	113917	477.236	20.8753	CSMD3;	3	0	3	0	0	0	1	1	1	0	0	0	0	0	0	0	0	0	0	0
6	17	158698	158813	114.839	20.8231	TULP4;	3	0	3	0	0	1	1	0	1	0	0	0	0	0	0	0	0	0	0	0
4	20	129987	130067	80.105	20.7527	SCLT1;C4orf33;RP11-392L5.2;ZSWIM5P3;	4	0	4	0	0	1	1	1	1	0	0	0	0	0	0	0	0	0	0	0
9	8	128037	128084	47.574	20.7104	GAPVD1;	2	0	2	0	0	1	0	0	1	0	0	0	0	0	0	0	0	0	0	0
12	7	82863.8	83115	251.162	20.7049	METTL25;RP11-263K4.5;RP11-263K4.4;RP11-263K4.3;TMTC2;	4	0	4	0	0	1	1	1	1	0	0	0	0	0	0	0	0	0	0	0
1	5	82643.1	82643.1	0	20.6198		0	0	0	0	0	0	0	0	0	0	0	0	0	0	0	0	0	0	0	0
18	0	7988.64	8078.55	89.91	20.5918	PTPRM;	3	0	3	0	0	1	0	1	1	0	0	0	0	0	0	0	0	0	0	0
9	2	91753.6	91792.5	38.892	20.5652	SHC3;	1	0	1	0	0	1	0	0	0	0	0	0	0	0	0	0	0	0	0	0
12	1	46177.5	46304.4	126.846	20.5094	ARID2;	0	0	0	0	0	0	0	0	0	0	0	0	0	0	0	0	0	0	0	0
14	2	44005.7	44539.7	534.047	20.4692	KRT8P2;RP11-557C9.1;RP11-305B6.3;	2	0	2	0	0	0	1	0	1	0	0	0	0	0	0	0	0	0	0	0
14	3	48230.8	48276.2	45.431	20.427	MIR548Y;LINC00648;RP11-476J6.1;	1	0	1	0	0	1	0	0	0	0	0	0	0	0	0	0	0	0	0	0
19	2	34829.3	35181.4	352.164	20.3353	KIAA0355;GPI;RP11-618P17.4;PDCD2L;SCGB2B2;ZNF302;	4	0	4	0	0	1	1	1	1	0	0	0	0	0	0	0	0	0	0	0
13	4	52652.7	53033.7	381.002	20.3302	NEK5;NEK3;THSD1;VPS36;CKAP2;	4	0	4	0	0	1	1	1	1	0	0	0	0	0	0	0	0	0	0	0
4	15	106903	106967	63.804	20.3176	NPNT;RP11-710F7.3;TBCK;	3	0	3	0	0	0	1	1	1	0	0	0	0	0	0	0	0	0	0	0
14	9	81169.5	81355.2	185.755	20.1968	CEP128;	3	2	3	0	2	1	1	0	1	0	0	0	0	0	0	0	1	0	1	0
14	4	48891.4	49193.6	302.217	20.1791	RP11-2G1.1;	0	0	0	0	0	0	0	0	0	0	0	0	0	0	0	0	0	0	0	0
16	7	69240.5	69916.1	675.595	20.1596	SNTB2;NFAT5;WWP2;	4	0	4	0	0	1	1	1	1	0	0	0	0	0	0	0	0	0	0	0
15	0	43393.6	43502.3	108.656	20.1372	UBR1;RPS3AP47;TMEM62;SPCS2P1;CCNDBP1;EPB42;	1	0	1	0	0	0	0	1	0	0	0	0	0	0	0	0	0	0	0	0
11	5	46993.5	47211.6	218.096	20.1282	C11orf49;ARFGAP2;PACSIN3;	1	1	1	0	1	1	0	0	0	0	0	0	0	0	0	1	0	0	0	0
20	2	20454.5	20674.9	220.404	20.1087	RALGAPA2;	3	0	3	0	0	1	1	0	1	0	0	0	0	0	0	0	0	0	0	0
7	3	23780.6	23873.2	92.604	20.0765	STK31;	3	0	3	0	0	1	1	0	1	0	0	0	0	0	0	0	0	0	0	0
8	1	37551.8	38149.4	597.637	20.0134	ZNF703;RP11-863K10.2;BAG4;DDHD2;PLPP5;WHSC1L1;	4	0	4	0	0	1	1	1	1	0	0	0	0	0	0	0	0	0	0	0
19	0	10743.1	10976.6	233.508	20.0014	SLC44A2;ILF3;C19orf38;	4	0	4	0	0	1	1	1	1	0	0	0	0	0	0	0	0	0	0	0
8	23	118400	118401	1.036	19.9673		3	0	3	0	0	0	1	1	1	0	0	0	0	0	0	0	0	0	0	0
1	0	31767	31829.9	62.917	19.9414	SNRNP40;ZCCHC17;	1	2	1	2	0	1	0	0	0	0	0	0	0	1	1	0	0	0	0	0
14	12	104451	104523	72.281	19.9383	TDRD9;	4	0	4	0	0	1	1	1	1	0	0	0	0	0	0	0	0	0	0	0
4	7	46415	46999.2	584.277	19.896	GABRA2;COX7B2;GABRA4;	1	0	1	0	0	0	0	0	1	0	0	0	0	0	0	0	0	0	0	0
8	10	67501.8	67823.9	322.109	19.808	MYBL1;VCPIP1;SGK3;MCMDC2;	2	0	2	0	0	0	1	0	1	0	0	0	0	0	0	0	0	0	0	0
4	11	74367.7	74439	71.282	19.8067	AFM;RP11-622A1.2;RP11-622A1.1;RASSF6;	2	0	2	0	0	1	1	0	0	0	0	0	0	0	0	0	0	0	0	0
7	15	94295.1	94342.4	47.216	19.7858	PEG10;RPS3AP25;RNU6-956P;	2	0	2	0	0	0	1	0	1	0	0	0	0	0	0	0	0	0	0	0
7	1	8003	8074.61	71.61	19.705	AC006042.7;GLCCI1;	1	0	1	0	0	1	0	0	0	0	0	0	0	0	0	0	0	0	0	0
11	7	71161.1	71235.2	74.131	19.6697	NADSYN1;RP11-684B2.3;KRTAP5-7;	1	0	1	0	0	0	0	0	1	0	0	0	0	0	0	0	0	0	0	0
14	1	36111.8	36130	18.149	19.6398	RALGAPA1;	1	0	1	0	0	1	0	0	0	0	0	0	0	0	0	0	0	0	0	0
2	1	55773.1	55848.2	75.151	19.6113		3	2	3	2	0	1	1	0	1	0	0	0	0	1	1	0	0	0	0	0
4	17	110373	110421	47.513	19.6026	SEC24B;	4	0	4	0	0	1	1	1	1	0	0	0	0	0	0	0	0	0	0	0
6	7	82041.2	82393.5	352.338	19.5945	FAM46A;	2	0	2	0	0	1	0	0	1	0	0	0	0	0	0	0	0	0	0	0
1	4	69543.7	69634.4	90.662	19.5649	RP11-424D14.1;	2	0	2	0	0	1	0	1	0	0	0	0	0	0	0	0	0	0	0	0
3	10	89901.4	89938.6	37.211	19.5601		3	0	3	0	0	1	1	0	1	0	0	0	0	0	0	0	0	0	0	0
18	1	42705.7	42764	58.284	19.5494	RP11-846C15.2;	0	0	0	0	0	0	0	0	0	0	0	0	0	0	0	0	0	0	0	0
4	23	146831	147077	245.366	19.387	ZNF827;Y_RNA;	3	0	3	0	0	1	0	1	1	0	0	0	0	0	0	0	0	0	0	0
5	6	72283.3	72381.1	97.813	19.3781	FCHO2;	4	0	4	0	0	1	1	1	1	0	0	0	0	0	0	0	0	0	0	0
6	18	163100	163188	88.745	19.2984	PARK2;PACRG;	0	3	0	3	0	0	0	0	0	0	0	0	1	1	1	0	0	0	0	0
17	1	26387.7	26447.3	59.623	19.2829	NLK;	2	0	2	0	0	0	1	0	1	0	0	0	0	0	0	0	0	0	0	0
2	9	114386	114426	39.124	19.2544	RABL2A;RP11-395L14.17;RP11-395L14.13;AC017074.1;	3	0	3	0	0	1	1	0	1	0	0	0	0	0	0	0	0	0	0	0
2	24	190268	190345	76.941	19.2195	WDR75;	2	2	2	2	0	0	1	0	1	0	0	0	1	0	1	0	0	0	0	0
5	10	102326	102453	126.678	19.2175	PAM;EIF3KP1;GIN1;	2	0	2	0	0	1	0	1	0	0	0	0	0	0	0	0	0	0	0	0
16	0	2513.18	2591.13	77.949	19.1344	C16orf59;TBC1D24;RP11-20I23.1;RP11-20I23.3;AMDHD2;CEMP1;PDPK1;	1	0	1	0	0	0	1	0	0	0	0	0	0	0	0	0	0	0	0	0
3	20	162858	162939	81.004	19.021	RP11-10O22.1;LINC01192;	0	7	0	4	3	0	0	0	0	0	1	0	1	1	1	0	0	1	1	1
7	4	28766.9	28846	79.166	18.9861	CREB5;	1	5	1	0	5	0	0	0	1	0	0	0	0	0	0	1	1	1	1	1
4	8	48562.6	48886.7	324.102	18.9721	FRYL;OCIAD1;OCIAD2;	3	0	3	0	0	1	1	0	1	0	0	0	0	0	0	0	0	0	0	0
16	5	59283.3	59293.8	10.554	18.9502		0	0	0	0	0	0	0	0	0	0	0	0	0	0	0	0	0	0	0	0
6	6	75111.9	75275.4	163.449	18.948	RP11-554D15.1;	3	0	3	0	0	1	1	1	0	0	0	0	0	0	0	0	0	0	0	0
2	3	84250	84304.8	54.829	18.9469	AC016908.1;ST6GALNAC2P1;	2	0	2	0	0	0	1	0	1	0	0	0	0	0	0	0	0	0	0	0
2	23	186970	187047	76.454	18.9397	AC104058.1;	0	0	0	0	0	0	0	0	0	0	0	0	0	0	0	0	0	0	0	0
4	13	92952.1	93201.5	249.443	18.8912	RP11-562F9.2;	4	0	4	0	0	1	1	1	1	0	0	0	0	0	0	0	0	0	0	0
13	9	70780.8	70780.8	0.006	18.8598		0	0	0	0	0	0	0	0	0	0	0	0	0	0	0	0	0	0	0	0
8	21	114449	114467	17.902	18.8403	CSMD3;	4	2	4	2	0	1	1	1	1	0	1	0	1	0	0	0	0	0	0	0
8	17	106984	107018	33.562	18.8174	ZFPM2-AS1;	1	0	1	0	0	0	0	0	1	0	0	0	0	0	0	0	0	0	0	0
16	8	72182.4	72635.7	453.259	18.802	PMFBP1;LINC01572;AC004158.3;	4	0	4	0	0	1	1	1	1	0	0	0	0	0	0	0	0	0	0	0
12	4	76787.1	76884.9	97.785	18.7942	OSBPL8;	4	0	4	0	0	1	1	1	1	0	0	0	0	0	0	0	0	0	0	0
11	10	108835	108914	79.295	18.7811	RP11-25I9.2;RNU6-654P;	2	1	2	1	0	0	1	1	0	0	0	0	1	0	0	0	0	0	0	0
11	13	114503	114555	52.036	18.7738	NXPE2;	1	0	1	0	0	1	0	0	0	0	0	0	0	0	0	0	0	0	0	0
2	0	21742.9	21778	35.111	18.7649	AC011752.1;	0	0	0	0	0	0	0	0	0	0	0	0	0	0	0	0	0	0	0	0
2	19	172655	172755	99.945	18.6944	SLC25A12;	2	0	2	0	0	0	1	0	1	0	0	0	0	0	0	0	0	0	0	0
4	5	20999.1	21087.2	88.154	18.6678	KCNIP4;	0	0	0	0	0	0	0	0	0	0	0	0	0	0	0	0	0	0	0	0
3	9	87194.7	87296.4	101.652	18.663	MIR4795;CHMP2B;	1	0	1	0	0	1	0	0	0	0	0	0	0	0	0	0	0	0	0	0
14	11	102100	102748	648.158	18.6202	RP11-1029J19.4;RP11-1029J19.5;RP11-796G6.1;LINC00239;PPP2R5C;RP11-1017G21.5;RP11-1017G21.6;MOK;	4	2	4	2	0	1	1	1	1	0	1	0	0	0	1	0	0	0	0	0
3	23	196611	196641	29.807	18.5863	SENP5;	0	1	0	0	1	0	0	0	0	0	0	0	0	0	0	0	0	1	0	0
20	5	41720.9	41930.4	209.446	18.542	PTPRT;SCARNA15;	0	0	0	0	0	0	0	0	0	0	0	0	0	0	0	0	0	0	0	0
8	7	62234.4	62283.2	48.804	18.5215	CLVS1;	1	0	1	0	0	1	0	0	0	0	0	0	0	0	0	0	0	0	0	0
2	14	150560	150636	76.046	18.5105	AC144449.1;AC007364.1;	3	0	3	0	0	0	1	1	1	0	0	0	0	0	0	0	0	0	0	0
8	19	112053	112054	0.182	18.4791		3	0	3	0	0	1	1	0	1	0	0	0	0	0	0	0	0	0	0	0
3	16	135676	135724	47.697	18.3818	PPP2R3A;	1	0	1	0	0	0	0	1	0	0	0	0	0	0	0	0	0	0	0	0
18	3	45368.6	45442.1	73.542	18.3798	SMAD2;	1	0	1	0	0	0	1	0	0	0	0	0	0	0	0	0	0	0	0	0
11	0	10049.5	10128.7	79.147	18.3549	SBF2;	4	0	4	0	0	1	1	1	1	0	0	0	0	0	0	0	0	0	0	0
5	0	29114.4	29127	12.658	18.3388		0	0	0	0	0	0	0	0	0	0	0	0	0	0	0	0	0	0	0	0
9	7	125617	125656	39.418	18.335	RC3H2;	1	0	1	0	0	0	1	0	0	0	0	0	0	0	0	0	0	0	0	0
12	3	74428.1	74505.6	77.47	18.2824	RP11-711C17.2;	1	5	1	1	4	1	0	0	0	0	1	0	0	0	0	1	0	1	1	1
13	3	50899.8	50963.4	63.612	18.2821	DLEU1;RPL34P26;	0	2	0	0	2	0	0	0	0	0	0	0	0	0	0	0	1	0	0	1
7	17	128599	128726	126.153	18.2648	TNPO3;RP11-128A6.3;	2	0	2	0	0	1	1	0	0	0	0	0	0	0	0	0	0	0	0	0
12	2	47000.1	47063.6	63.528	18.2461	RP11-446N19.1;	3	0	3	0	0	1	1	0	1	0	0	0	0	0	0	0	0	0	0	0
1	7	93601.2	93651.6	50.445	18.2414	MTF2;TMED5;CCDC18;	2	1	2	0	1	1	0	1	0	0	0	0	0	0	0	0	0	0	1	0
4	28	177483	177509	26.372	18.227		1	0	1	0	0	1	0	0	0	0	0	0	0	0	0	0	0	0	0	0
3	14	118453	118453	0.044	18.2163		1	0	1	0	0	1	0	0	0	0	0	0	0	0	0	0	0	0	0	0
14	8	79742	79784.7	42.615	18.2	NRXN3;	1	0	1	0	0	0	0	1	0	0	0	0	0	0	0	0	0	0	0	0
6	16	130657	130713	56.162	18.195	SAMD3;TMEM200A;	1	0	1	0	0	0	0	1	0	0	0	0	0	0	0	0	0	0	0	0
7	5	35184.2	35229.6	45.388	18.1524	DPY19L2P1;S100A11P2;	3	0	3	0	0	0	1	1	1	0	0	0	0	0	0	0	0	0	0	0
3	17	146556	146556	0	18.0738		1	0	1	0	0	0	1	0	0	0	0	0	0	0	0	0	0	0	0	0
2	17	160418	160484	66.875	18.0661	BAZ2B;	0	0	0	0	0	0	0	0	0	0	0	0	0	0	0	0	0	0	0	0
2	10	120558	120596	37.416	18.0037	PTPN4;	2	0	2	0	0	1	0	0	1	0	0	0	0	0	0	0	0	0	0	0
6	9	86287.1	86309.7	22.569	17.9955	SNX14;RP11-321N4.5;	2	0	2	0	0	0	1	1	0	0	0	0	0	0	0	0	0	0	0	0
4	27	168129	168154	25.535	17.9517	SPOCK3;	3	0	3	0	0	1	0	1	1	0	0	0	0	0	0	0	0	0	0	0
1	6	92844.8	92871.9	27.113	17.9497	RPAP2;	4	1	4	0	1	1	1	1	1	0	0	0	0	0	0	0	0	0	1	0
8	12	76695.9	76702.5	6.681	17.9339		4	5	4	0	5	1	1	1	1	0	0	0	0	0	0	1	1	1	1	1
18	5	69666	69666.1	0.092	17.8902		1	0	1	0	0	1	0	0	0	0	0	0	0	0	0	0	0	0	0	0
15	3	73768.5	73809.6	41.065	17.8769	REC114;	2	1	2	1	0	0	0	1	1	0	0	0	0	0	1	0	0	0	0	0
14	10	84303.7	84337.1	33.411	17.8161		2	0	2	0	0	0	0	1	1	0	0	0	0	0	0	0	0	0	0	0
13	14	89188.2	89245	56.769	17.7964	LINC00433;	2	0	2	0	0	0	1	1	0	0	0	0	0	0	0	0	0	0	0	0
13	1	42389.5	42435.3	45.86	17.698	VWA8;	3	1	3	0	1	1	1	0	1	0	0	0	0	0	0	1	0	0	0	0
2	7	99992.6	100025	32.911	17.6719	EIF5B;REV1;	0	0	0	0	0	0	0	0	0	0	0	0	0	0	0	0	0	0	0	0
18	2	44072.1	44114.6	42.506	17.6631	LOXHD1;	1	0	1	0	0	1	0	0	0	0	0	0	0	0	0	0	0	0	0	0
7	16	99636.9	99704.8	67.88	17.6587	ZKSCAN1;ZSCAN21;ZNF3;MCM7;AP4M1;TAF6;	0	0	0	0	0	0	0	0	0	0	0	0	0	0	0	0	0	0	0	0
19	1	21455.8	21491.3	35.505	17.6485	CTD-3030D20.1;VN1R83P;ZNF708;	1	0	1	0	0	0	0	0	1	0	0	0	0	0	0	0	0	0	0	0
8	3	41344.1	41373.4	29.364	17.6161	GOLGA7;	1	0	1	0	0	1	0	0	0	0	0	0	0	0	0	0	0	0	0	0
11	3	28974.4	29013.9	39.515	17.4925	RP11-115J23.1;	1	1	1	0	1	0	0	1	0	0	0	0	0	0	0	0	0	0	0	1
4	18	119062	119111	49.389	17.4782	NDST3;	2	0	2	0	0	0	1	1	0	0	0	0	0	0	0	0	0	0	0	0
3	0	15070.7	15128.5	57.803	17.4749	NR2C2;MRPS25;RBSN;	0	0	0	0	0	0	0	0	0	0	0	0	0	0	0	0	0	0	0	0
6	0	31237.9	31268.2	30.291	17.4611	HLA-C;RPL3P2;USP8P1;WASF5P;XXbac-BPG248L24.13;OSBP2;	1	1	1	1	0	1	0	0	0	0	1	0	0	0	0	0	0	0	0	0
11	8	75505.2	75583.7	78.51	17.449	DGAT2;RP11-535A19.1;RP11-535A19.2;UVRAG;	0	0	0	0	0	0	0	0	0	0	0	0	0	0	0	0	0	0	0	0
10	4	92277	92339.8	62.836	17.3959	RP11-15K3.1;	1	0	1	0	0	0	0	1	0	0	0	0	0	0	0	0	0	0	0	0
6	11	93807.7	93817.4	9.698	17.3781	RP1-23E21.2;	1	0	1	0	0	1	0	0	0	0	0	0	0	0	0	0	0	0	0	0
21	1	44219.8	44274.2	54.47	17.3735	AP001628.6;WDR4;	1	0	1	0	0	0	1	0	0	0	0	0	0	0	0	0	0	0	0	0
13	7	59379	59379	0	17.3535		0	0	0	0	0	0	0	0	0	0	0	0	0	0	0	0	0	0	0	0
5	11	105531	105531	0	17.3226		0	0	0	0	0	0	0	0	0	0	0	0	0	0	0	0	0	0	0	0
8	13	80580.1	80652	71.989	17.2968	STMN2;	2	0	2	0	0	1	0	0	1	0	0	0	0	0	0	0	0	0	0	0
2	20	175971	176021	49.659	17.2822	ATF2;	2	4	2	4	0	0	0	1	1	0	1	1	1	1	0	0	0	0	0	0
5	1	42824.6	42911.2	86.573	17.2791	SEPP1;CTD-2325A15.3;PRELID3BP4;PRELID3BP5;	0	0	0	0	0	0	0	0	0	0	0	0	0	0	0	0	0	0	0	0
8	16	100569	100606	37.073	17.2784	VPS13B;PTCSC2;	2	0	2	0	0	1	1	0	0	0	0	0	0	0	0	0	0	0	0	0
12	0	27240.7	27447.2	206.52	17.2641	RP11-582E3.5;RP11-582E3.2;RP11-582E3.4;STK38L;	2	0	2	0	0	1	0	0	1	0	0	0	0	0	0	0	0	0	0	0
14	0	26752.1	26759.7	7.627	17.2601		1	0	1	0	0	1	0	0	0	0	0	0	0	0	0	0	0	0	0	0
3	19	160484	160548	64.344	17.219	PPM1L;	2	0	2	0	0	0	0	1	1	0	0	0	0	0	0	0	0	0	0	0
13	12	86439.2	86439.2	0	17.2095		0	0	0	0	0	0	0	0	0	0	0	0	0	0	0	0	0	0	0	0
5	12	138049	138081	32.671	17.1801	CTNNA1;AC034243.1;	1	0	1	0	0	0	0	0	1	0	0	0	0	0	0	0	0	0	0	0
2	13	147479	147479	0	17.175		1	0	1	0	0	0	0	0	1	0	0	0	0	0	0	0	0	0	0	0
10	1	69787.9	69846.7	58.835	17.154		1	4	1	4	0	1	0	0	0	0	1	1	1	0	1	0	0	0	0	0
20	6	58495.1	58502.5	7.359	17.1527	SYCP2;	0	0	0	0	0	0	0	0	0	0	0	0	0	0	0	0	0	0	0	0
3	1	25671.8	25693.2	21.457	17.1422	TOP2B;	1	1	1	0	1	0	0	1	0	0	0	0	0	0	0	0	0	0	1	0
2	12	144446	144470	24.107	17.1327	ARHGAP15;	4	0	4	0	0	1	1	1	1	0	0	0	0	0	0	0	0	0	0	0
4	1	1893.25	1950.96	57.711	17.0995	WHSC1;	2	0	2	0	0	0	1	1	0	0	0	0	0	0	0	0	0	0	0	0
13	13	87560.4	87576.1	15.668	17.0962	LINC00430;	2	0	2	0	0	1	1	0	0	0	0	0	0	0	0	0	0	0	0	0
6	19	164825	164877	52.495	17.0912		1	0	1	0	0	0	0	0	1	0	0	0	0	0	0	0	0	0	0	0
16	6	62069.5	62112.2	42.682	17.0444	CDH8;	2	0	2	0	0	0	0	1	1	0	0	0	0	0	0	0	0	0	0	0
15	2	49491.5	49905.7	414.136	17.0379	GALK2;FAM227B;	1	6	1	5	1	0	1	0	0	0	1	1	1	1	1	0	0	0	1	0
1	2	60283.7	60288.7	5.002	17.0214	HOOK1;	2	4	2	0	4	0	1	0	1	0	0	0	0	0	0	1	1	1	0	1
5	3	52315.1	52573.3	258.18	16.9925	ITGA2;RP11-94D20.1;	2	0	2	0	0	0	1	1	0	0	0	0	0	0	0	0	0	0	0	0
6	15	127046	127046	0	16.9738		3	0	3	0	0	0	1	1	1	0	0	0	0	0	0	0	0	0	0	0
8	11	73690.4	73692.1	1.659	16.9702	KCNB2;	0	0	0	0	0	0	0	0	0	0	0	0	0	0	0	0	0	0	0	0
7	12	84215	84277.3	62.266	16.9658	AC003984.1;	2	0	2	0	0	0	1	0	1	0	0	0	0	0	0	0	0	0	0	0
5	5	56132.6	56175.2	42.599	16.9556	MAP3K1;	0	0	0	0	0	0	0	0	0	0	0	0	0	0	0	0	0	0	0	0
3	2	27175.5	27192.8	17.23	16.9281	NEK10;	1	4	1	0	4	1	0	0	0	0	0	0	0	0	0	1	1	1	1	0
3	13	112826	112898	71.716	16.9123	RP11-572M11.4;RP11-572M11.3;	1	0	1	0	0	1	0	0	0	0	0	0	0	0	0	0	0	0	0	0
1	12	161779	161786	7.617	16.9106	ATF6;	2	0	2	0	0	1	1	0	0	0	0	0	0	0	0	0	0	0	0	0
12	9	113658	113836	177.871	16.9066	PLBD2;SDS;	3	1	3	0	1	1	1	1	0	0	0	0	0	0	0	0	0	0	0	1
13	16	96859.9	96923.7	63.788	16.8854	HS6ST3;	0	0	0	0	0	0	0	0	0	0	0	0	0	0	0	0	0	0	0	0
6	12	97761.8	97761.8	0	16.8799		1	0	1	0	0	0	0	0	1	0	0	0	0	0	0	0	0	0	0	0
7	19	133908	133933	24.462	16.8165	LRGUK;	0	0	0	0	0	0	0	0	0	0	0	0	0	0	0	0	0	0	0	0
6	13	115543	115562	19.973	16.7992		2	0	2	0	0	0	1	0	1	0	0	0	0	0	0	0	0	0	0	0
14	5	55679.7	55679.7	0	16.798		2	0	2	0	0	1	0	0	1	0	0	0	0	0	0	0	0	0	0	0
8	25	137899	137916	16.922	16.786	RP11-30J20.1;	0	0	0	0	0	0	0	0	0	0	0	0	0	0	0	0	0	0	0	0
3	8	84157.7	84157.7	0.002	16.7848		0	0	0	0	0	0	0	0	0	0	0	0	0	0	0	0	0	0	0	0
18	4	49527.6	49535.1	7.427	16.779		3	0	3	0	0	1	1	0	1	0	0	0	0	0	0	0	0	0	0	0
11	14	118281	118297	15.317	16.7617	ATP5L;RP11-770J1.7;	2	0	2	0	0	0	1	0	1	0	0	0	0	0	0	0	0	0	0	0
13	11	78296.1	78311.1	14.994	16.7307	SLAIN1;	3	0	3	0	0	1	1	0	1	0	0	0	0	0	0	0	0	0	0	0
4	19	123276	123319	42.2	16.7127	KIAA1109;ADAD1;	1	0	1	0	0	1	0	0	0	0	0	0	0	0	0	0	0	0	0	0
4	25	158288	158288	0	16.6874		2	1	2	1	0	0	1	0	1	0	0	1	0	0	0	0	0	0	0	0
13	0	21174.6	21190.2	15.589	16.6815	IFT88;	0	0	0	0	0	0	0	0	0	0	0	0	0	0	0	0	0	0	0	0
4	26	162958	162967	9.428	16.6694	FSTL5;	2	0	2	0	0	1	0	1	0	0	0	0	0	0	0	0	0	0	0	0
8	15	95399.6	95429.6	30.017	16.6502	RAD54B;	3	0	3	0	0	1	1	0	1	0	0	0	0	0	0	0	0	0	0	0
8	9	65299.1	65300.1	0.954	16.5805	MIR124-2HG;	1	0	1	0	0	1	0	0	0	0	0	0	0	0	0	0	0	0	0	0
11	15	127924	127924	0	16.5786		0	0	0	0	0	0	0	0	0	0	0	0	0	0	0	0	0	0	0	0
1	3	63877.1	63880.4	3.295	16.5544	ALG6;	2	0	2	0	0	1	0	1	0	0	0	0	0	0	0	0	0	0	0	0
13	15	93380.2	93387.5	7.27	16.5454	GPC5;	0	0	0	0	0	0	0	0	0	0	0	0	0	0	0	0	0	0	0	0
2	5	86490.2	86510	19.846	16.5252	REEP1;	1	0	1	0	0	0	0	1	0	0	0	0	0	0	0	0	0	0	0	0
3	12	104877	104877	0	16.5194		1	0	1	0	0	0	0	0	1	0	0	0	0	0	0	0	0	0	0	0
10	2	86111.6	86124.6	12.933	16.513	CCSER2;	2	0	2	0	0	1	0	0	1	0	0	0	0	0	0	0	0	0	0	0
2	21	176657	176657	0	16.5125		2	0	2	0	0	0	0	1	1	0	0	0	0	0	0	0	0	0	0	0
8	6	54710.2	54715.5	5.23	16.5069	ATP6V1H;	0	0	0	0	0	0	0	0	0	0	0	0	0	0	0	0	0	0	0	0
4	6	34413.9	34413.9	0	16.4986		2	4	2	4	0	1	1	0	0	0	1	0	1	1	1	0	0	0	0	0
6	2	56975.7	57001.6	25.847	16.4746	ZNF451;	0	0	0	0	0	0	0	0	0	0	0	0	0	0	0	0	0	0	0	0
9	3	92801.6	92802.1	0.475	16.4606	MIR4290HG;	0	0	0	0	0	0	0	0	0	0	0	0	0	0	0	0	0	0	0	0
1	13	167316	167334	18.075	16.4569	POU2F1;	1	0	1	0	0	0	1	0	0	0	0	0	0	0	0	0	0	0	0	0
20	0	8134.63	8159.86	25.231	16.4333	PLCB1;	0	0	0	0	0	0	0	0	0	0	0	0	0	0	0	0	0	0	0	0
3	4	47133.4	47134.6	1.214	16.4272	SETD2;	2	0	2	0	0	0	1	1	0	0	0	0	0	0	0	0	0	0	0	0
5	9	93964	93982.6	18.574	16.4061	SLF1;	0	0	0	0	0	0	0	0	0	0	0	0	0	0	0	0	0	0	0	0
8	5	51693.5	51711	17.561	16.3833	SNTG1;	0	2	0	1	1	0	0	0	0	0	0	0	0	0	1	0	0	0	0	1
8	22	115059	115059	0	16.3734		1	0	1	0	0	1	0	0	0	0	0	0	0	0	0	0	0	0	0	0
2	2	83395.9	83413.1	17.256	16.3719		0	0	0	0	0	0	0	0	0	0	0	0	0	0	0	0	0	0	0	0
11	11	109476	109476	0	16.3677		2	0	2	0	0	1	0	1	0	0	0	0	0	0	0	0	0	0	0	0
3	11	102097	102101	3.453	16.3602	ZPLD1;	1	0	1	0	0	1	0	0	0	0	0	0	0	0	0	0	0	0	0	0
2	15	152159	152164	4.359	16.3479		1	0	1	0	0	0	1	0	0	0	0	0	0	0	0	0	0	0	0	0
2	11	140843	140872	28.888	16.307	AC073928.2;	0	0	0	0	0	0	0	0	0	0	0	0	0	0	0	0	0	0	0	0
7	0	2832.99	2843.44	10.444	16.3065	GNA12;	1	0	1	0	0	0	0	1	0	0	0	0	0	0	0	0	0	0	0	0
4	3	15061.1	15063.5	2.403	16.2786	CPEB2;	1	0	1	0	0	0	0	0	1	0	0	0	0	0	0	0	0	0	0	0
5	4	55069.2	55069.2	0	16.2556		3	0	3	0	0	0	1	1	1	0	0	0	0	0	0	0	0	0	0	0
11	9	101651	101659	8.32	16.2524	TRPC6;	0	0	0	0	0	0	0	0	0	0	0	0	0	0	0	0	0	0	0	0
2	8	102981	102981	0	16.2442		1	1	1	1	0	1	0	0	0	0	1	0	0	0	0	0	0	0	0	0
20	1	18452.7	18453	0.309	16.2234	POLR3F;	0	0	0	0	0	0	0	0	0	0	0	0	0	0	0	0	0	0	0	0
14	7	70080.9	70080.9	0	16.2232		0	0	0	0	0	0	0	0	0	0	0	0	0	0	0	0	0	0	0	0
10	9	115488	115490	1.319	16.212	CASP7;	0	0	0	0	0	0	0	0	0	0	0	0	0	0	0	0	0	0	0	0
9	6	123245	123250	4.841	16.1931	CDK5RAP2;	0	0	0	0	0	0	0	0	0	0	0	0	0	0	0	0	0	0	0	0
1	10	150355	150355	0	16.1787		1	0	1	0	0	0	0	1	0	0	0	0	0	0	0	0	0	0	0	0

## Sheet: EUR-CEU
Chrsme	Block	Begin	End	Size (Kb)	max CSS	Genes	wth_sharing	btw_sharing	AFR_sharing	EUR_sharing	ASI_sharing	Share_ESN	Share_GWD	Share_LWK	Share_MSL	Share_YRI	Share_CEU	Share_FIN	Share_GBR	Share_IBS	Share_TSI	Share_CDX	Share_CHB	Share_CHS	Share_JPT	Share_KHV
2	11	135008	137593	2584.56	43.3195	MGAT5;TMEM163;CCNT2-AS1;VDAC2P4;AC110620.1;ACMSD;MAP3K19;RAB3GAP1;ZRANB3;R3HDM1;UBXN4;LCT;MCM6;AC011999.1;DARS;DARS-AS1;AC068492.1;CXCR4;HNRNPKP2;RN7SKP141;SMC4P1;THSD7B;	3	3	0	3	3	0	0	0	0	0	0	1	1	1	0	0	1	1	1	0
15	3	48235.4	48901.4	666.017	39.8536	RP11-208K4.1;SLC12A1;RP11-154J22.1;DUT;FBN1;	4	0	0	4	0	0	0	0	0	0	0	1	1	1	1	0	0	0	0	0
18	0	7302.39	7693.44	391.05	33.4202	SNORA48;PTPRM;	4	0	0	4	0	0	0	0	0	0	0	1	1	1	1	0	0	0	0	0
5	10	109624	109818	194.028	33.0625	TMEM232;	4	1	0	4	1	0	0	0	0	0	0	1	1	1	1	1	0	0	0	0
19	4	40459.5	40604.8	145.293	32.0459	PSMC4;ZNF546;CTC-471F3.5;ZNF780B;ZNF780A;AC005614.3;	4	0	0	4	0	0	0	0	0	0	0	1	1	1	1	0	0	0	0	0
1	3	35536.5	36240.4	703.902	31.3491	ZMYM1;EFCAB14P1;ZMYM4;KIAA0319L;NCDN;TFAP2E;PSMB2;C1orf216;CLSPN;	4	0	0	4	0	0	0	0	0	0	0	1	1	1	1	0	0	0	0	0
2	10	122207	122474	266.935	30.6645	CLASP1;NIFK-AS1;RPL12P15;	4	2	0	4	2	0	0	0	0	0	0	1	1	1	1	0	0	0	1	1
17	6	63156.2	63394.2	238.001	30.4544	RGS9;	4	0	0	4	0	0	0	0	0	0	0	1	1	1	1	0	0	0	0	0
15	2	45123.6	45225.4	101.749	30.2837	SORD2P;Y_RNA;RNU1-119P;CTD-2014N11.1;	4	0	0	4	0	0	0	0	0	0	0	1	1	1	1	0	0	0	0	0
10	7	83630.3	84194.9	564.633	28.1516	NRG3;	4	0	0	4	0	0	0	0	0	0	0	1	1	1	1	0	0	0	0	0
4	10	81355.3	82106.1	750.802	27.5896	C4orf22;PRKG2;	4	2	0	4	2	0	0	0	0	0	0	1	1	1	1	1	0	0	0	1
8	17	117636	117758	121.715	26.881	EIF3H;	4	0	0	4	0	0	0	0	0	0	0	1	1	1	1	0	0	0	0	0
19	2	33511.8	33664.7	152.894	26.8641	RHPN2;GPATCH1;WDR88;	4	0	0	4	0	0	0	0	0	0	0	1	1	1	1	0	0	0	0	0
21	2	30938.5	31131.7	193.202	26.792	GRIK1;	3	0	0	3	0	0	0	0	0	0	0	0	1	1	1	0	0	0	0	0
4	5	33800.6	34515.4	714.786	26.6318	RP11-79E3.3;RP11-79E3.2;RP11-548L20.1;	4	3	3	4	0	1	1	0	0	1	0	1	1	1	1	0	0	0	0	0
10	10	98649.3	98778.1	128.847	26.3241	LCOR;ARHGAP19-SLIT1;	4	0	0	4	0	0	0	0	0	0	0	1	1	1	1	0	0	0	0	0
15	1	28397.8	29356.5	958.699	26.2118	HERC2;RP11-578F21.3;HERC2P9;RP11-578F21.2;GOLGA8M;RP11-578F21.6;WHAMMP2;APBA2;	4	0	0	4	0	0	0	0	0	0	0	1	1	1	1	0	0	0	0	0
12	2	22647.9	22700.4	52.532	25.4245	C2CD5;	0	4	0	0	4	0	0	0	0	0	0	0	0	0	0	1	1	1	1	0
5	17	142082	142271	188.565	25.2243	AC005592.3;AC005592.1;ARHGAP26;	4	0	0	4	0	0	0	0	0	0	0	1	1	1	1	0	0	0	0	0
7	8	98921.6	99266.3	344.718	25.2026	ARPC1A;ARPC1B;PDAP1;BUD31;ATP5J2-PTCD1;CPSF4;ZNF789;ZNF394;ZKSCAN5;CYP3A5;	3	0	0	3	0	0	0	0	0	0	0	0	1	1	1	0	0	0	0	0
1	18	198124	198977	853.447	25.114	NEK7;ATP6V1G3;MIR181A1;MIR181A1HG;RP11-16L9.2;LINC01222;	4	2	0	4	2	0	0	0	0	0	0	1	1	1	1	1	0	0	0	1
12	18	111574	111834	259.901	24.8979	CUX2;FAM109A;RP3-473L9.4;	3	0	0	3	0	0	0	0	0	0	0	0	1	1	1	0	0	0	0	0
14	8	66646.2	67849.1	1202.97	24.6898	RP11-72M17.1;GPHN;FAM71D;MPP5;ATP6V1D;EIF2S1;	4	0	0	4	0	0	0	0	0	0	0	1	1	1	1	0	0	0	0	0
1	5	52430.9	52546.6	115.718	24.3811	RAB3B;RN7SL290P;TXNDC12;KTI12;BTF3L4;	2	0	0	2	0	0	0	0	0	0	0	0	1	0	1	0	0	0	0	0
12	1	19294.7	19535.5	240.746	24.1978	PLEKHA5;	4	0	0	4	0	0	0	0	0	0	0	1	1	1	1	0	0	0	0	0
20	3	34185.2	34597	411.87	23.9161	FER1L4;SPAG4;CPNE1;RBM12;NFS1;ROMO1;RBM39;PHF20;SCAND1;CNBD2;	4	10	5	4	5	1	1	1	1	1	0	1	1	1	1	1	1	1	1	1
4	23	176261	176397	136.723	23.9005	RP11-287F9.2;RP11-598D14.1;	2	0	0	2	0	0	0	0	0	0	0	0	0	1	1	0	0	0	0	0
10	13	117804	118239	434.177	23.8192	CCDC172;SNRPGP6;PNLIPRP3;	3	0	0	3	0	0	0	0	0	0	0	0	1	1	1	0	0	0	0	0
6	4	28144.8	29632	1487.24	23.8185	ZNF603P;ZNF192P2;TOB2P1;ZSCAN9;ZKSCAN4;NKAPL;ZSCAN26;PGBD1;RPSAP2;NOP56P1;LINC01623;ZNF90P2;HCG14;TRIM27;LINC01556;KRT18P1;RN7SL471P;HCG15;OR2H4P;XXbac-BPG308J9.3;OR11A1;OR2H1;UBDP1;MOG;	4	4	0	4	4	0	0	0	0	0	0	1	1	1	1	1	1	0	1	1
6	23	144948	145160	212.31	23.6602	UTRN;	4	0	0	4	0	0	0	0	0	0	0	1	1	1	1	0	0	0	0	0
6	8	34703.6	35383.7	680.1	23.5336	RP3-375P9.2;SNRPC;UHRF1BP1;ZNF76;DEF6;PPARD;	4	2	2	4	0	0	1	0	1	0	0	1	1	1	1	0	0	0	0	0
4	21	171519	171808	289.633	23.4073	HSP90AA6P;RP11-213L8.1;RNU6ATAC13P;	4	1	0	4	1	0	0	0	0	0	0	1	1	1	1	0	0	0	1	0
2	25	197309	197410	101.194	23.3988	HECW2;	4	5	0	4	5	0	0	0	0	0	0	1	1	1	1	1	1	1	1	1
8	1	16193	16310.4	117.434	23.2897	MSR1;MRPL49P2;	2	0	0	2	0	0	0	0	0	0	0	0	1	1	0	0	0	0	0	0
6	24	151779	151886	107.516	23.2152	ARMT1;CCDC170;	4	1	1	4	0	0	0	1	0	0	0	1	1	1	1	0	0	0	0	0
3	6	110614	110914	300.207	23.1727	PVRL3-AS1;NECTIN3;	4	0	0	4	0	0	0	0	0	0	0	1	1	1	1	0	0	0	0	0
9	5	94166.1	94328.6	162.565	22.6689	NFIL3;RP11-440G5.2;ROR2;	4	0	0	4	0	0	0	0	0	0	0	1	1	1	1	0	0	0	0	0
4	0	2100.36	2244.86	144.502	22.5866	POLN;HAUS3;	2	0	0	2	0	0	0	0	0	0	0	0	0	1	1	0	0	0	0	0
14	2	39408.9	39969.5	560.512	22.5636	LINC00639;RP11-506K19.2;Y_RNA;SEC23A;RP11-111A21.1;	3	1	1	3	0	1	0	0	0	0	0	1	1	1	0	0	0	0	0	0
4	6	38741.3	38874.8	133.54	22.4296	RNA5SP158;TLR10;TLR6;FAM114A1;	4	0	0	4	0	0	0	0	0	0	0	1	1	1	1	0	0	0	0	0
6	22	139363	139495	132.224	22.3969	ABRACL;HECA;	3	0	0	3	0	0	0	0	0	0	0	0	1	1	1	0	0	0	0	0
8	3	29781.2	30111.4	330.273	21.852	FAM183CP;DCTN6;RP11-51J9.6;HSPA8P11;CTD-2345M20.2;	4	0	0	4	0	0	0	0	0	0	0	1	1	1	1	0	0	0	0	0
7	10	102504	102948	444.139	21.8331	FBXL13;DPY19L2P2;S100A11P1;PMPCB;	4	0	0	4	0	0	0	0	0	0	0	1	1	1	1	0	0	0	0	0
10	11	111886	111975	88.951	21.8143	ADD3;MXI1;	2	0	0	2	0	0	0	0	0	0	0	1	1	0	0	0	0	0	0	0
7	7	88347.9	88949.7	601.856	21.7723	AC002127.4;ZNF804B;C7orf62;	2	4	0	2	4	0	0	0	0	0	0	0	1	0	1	0	1	1	1	1
18	5	23676.4	23789.7	113.259	21.6848	RPS24P18;PSMA8;NPM1P2;	2	2	1	2	1	0	1	0	0	0	0	0	0	1	1	0	1	0	0	0
8	10	58252.7	58333.2	80.511	21.4804	RP11-756K15.2;RPL30P10;	3	0	0	3	0	0	0	0	0	0	0	0	1	1	1	0	0	0	0	0
6	2	13222.9	13336.8	113.938	21.4682	PHACTR1;TBC1D7;	4	0	0	4	0	0	0	0	0	0	0	1	1	1	1	0	0	0	0	0
16	4	79740.4	79851.2	110.868	21.4466	LINC01229;MAFTRR;LINC01228;	3	3	0	3	3	0	0	0	0	0	0	0	1	1	1	0	1	1	0	1
4	19	158021	158096	74.818	21.4312	GLRB;	4	0	0	4	0	0	0	0	0	0	0	1	1	1	1	0	0	0	0	0
12	19	112342	112454	111.225	21.4094	ADAM1A;ADAM1B;TMEM116;ERP29;	4	2	0	4	2	0	0	0	0	0	0	1	1	1	1	1	1	0	0	0
9	7	126327	126696	368.967	21.3305	DENND1A;	3	5	0	3	5	0	0	0	0	0	0	0	1	1	1	1	1	1	1	1
11	7	71631.1	71702.1	71.013	21.3078	RNF121;	3	0	0	3	0	0	0	0	0	0	0	1	1	0	1	0	0	0	0	0
8	9	55154.6	55251.3	96.674	21.1719	RP11-767C6.1;RNU105C;	3	0	0	3	0	0	0	0	0	0	0	0	1	1	1	0	0	0	0	0
2	19	175949	176050	101.893	21.1447	ATF2;ATP5G3;	3	3	3	3	0	0	0	1	1	1	0	1	1	1	0	0	0	0	0	0
2	18	167932	168525	592.589	21.0849	XIRP2;RNU7-148P;	4	1	0	4	1	0	0	0	0	0	0	1	1	1	1	1	0	0	0	0
1	0	1121.34	1364.35	243.008	21.031	TTLL10;FAM132A;UBE2J2;CPSF3L;CPTP;MXRA8;AURKAIP1;NDUFB4P8;CCNL2;MRPL20;ANKRD65;TMEM88B;	4	4	0	4	4	0	0	0	0	0	0	1	1	1	1	1	1	1	0	1
4	8	61210.9	61454.5	243.667	20.8322		4	1	0	4	1	0	0	0	0	0	0	1	1	1	1	0	0	0	1	0
2	13	152526	153080	553.659	20.758	NEB;ARL5A;STAM2;	4	1	0	4	1	0	0	0	0	0	0	1	1	1	1	0	0	0	1	0
11	4	66998.9	67191.4	192.594	20.7062	KDM2A;ANKRD13D;SSH3;POLD4;CLCF1;RAD9A;PPP1CA;TBC1D10C;CARNS1;	2	2	0	2	2	0	0	0	0	0	0	0	1	1	0	0	1	1	0	0
14	7	63669.6	64546.8	877.135	20.7017	RHOJ;RP11-696D21.2;U3;SGPP1;SYNE2;	4	0	0	4	0	0	0	0	0	0	0	1	1	1	1	0	0	0	0	0
12	14	89186.6	89290.7	104.117	20.6244		3	2	0	3	2	0	0	0	0	0	0	0	1	1	1	0	0	1	1	0
5	1	4712.45	4809.1	96.649	20.5684	RP11-445O3.2;	4	0	0	4	0	0	0	0	0	0	0	1	1	1	1	0	0	0	0	0
1	19	206169	206234	65.227	20.3937	RP11-38J22.2;RP11-38J22.3;AVPR1B;	4	0	0	4	0	0	0	0	0	0	0	1	1	1	1	0	0	0	0	0
18	8	55018.9	55091.3	72.446	20.3307	ST8SIA3;	1	0	0	1	0	0	0	0	0	0	0	0	1	0	0	0	0	0	0	0
15	4	49798.2	49907	108.842	20.2208	FAM227B;	4	2	2	4	0	0	1	0	0	1	0	1	1	1	1	0	0	0	0	0
11	3	41617	41704.1	87.086	20.1787	RP11-124G5.3;	1	0	0	1	0	0	0	0	0	0	0	1	0	0	0	0	0	0	0	0
22	0	25990.8	26470.2	479.428	20.0724	GRK3;	1	1	0	1	1	0	0	0	0	0	0	0	1	0	0	1	0	0	0	0
2	20	178356	178473	117.235	20.0642	AGPS;TTC30B;AC073834.3;TTC30A;	3	0	0	3	0	0	0	0	0	0	0	1	1	0	1	0	0	0	0	0
8	8	52705.6	52891.1	185.432	20.0638	PXDNL;PCMTD1;RP11-110G21.1;RP11-546K22.3;RP11-546K22.1;	0	5	0	0	5	0	0	0	0	0	0	0	0	0	0	1	1	1	1	1
5	12	115419	115791	372.111	20.0553	COMMD10;CTC-339F2.2;SEMA6A;	4	0	0	4	0	0	0	0	0	0	0	1	1	1	1	0	0	0	0	0
21	3	36544.6	36625	80.419	19.9765	RUNX1;	4	0	0	4	0	0	0	0	0	0	0	1	1	1	1	0	0	0	0	0
1	12	80365.5	80448.2	82.651	19.9303		4	0	0	4	0	0	0	0	0	0	0	1	1	1	1	0	0	0	0	0
3	9	129122	129253	131.181	19.9208	EFCAB12;MBD4;IFT122;RHO;	4	0	0	4	0	0	0	0	0	0	0	1	1	1	1	0	0	0	0	0
10	5	76678.6	76944.9	266.299	19.9109	KAT6B;DUPD1;PPIAP13;DUSP13;SAMD8;	3	0	0	3	0	0	0	0	0	0	0	1	1	1	0	0	0	0	0	0
2	3	41627.5	41642	14.53	19.8477		1	0	0	1	0	0	0	0	0	0	0	0	0	0	1	0	0	0	0	0
9	4	90896	91046.3	150.365	19.719	RPSAP49;SPIN1;	4	1	0	4	1	0	0	0	0	0	0	1	1	1	1	0	0	1	0	0
2	16	158685	158765	79.693	19.6916	ACVR1;UPP2;	4	0	0	4	0	0	0	0	0	0	0	1	1	1	1	0	0	0	0	0
12	7	50038.3	50169.1	130.778	19.5907	FMNL3;TMBIM6;LSM6P2;	3	3	0	3	3	0	0	0	0	0	0	1	1	0	1	1	0	1	1	0
2	7	83234.4	83331.4	97.04	19.5274		4	0	0	4	0	0	0	0	0	0	0	1	1	1	1	0	0	0	0	0
6	18	109838	110448	609.784	19.4796	AK9;WASF1;	4	1	1	4	0	0	1	0	0	0	0	1	1	1	1	0	0	0	0	0
7	16	142719	142836	117.538	19.4557	OR9A2;OR9P1P;OR6V1;OR6W1P;PIP;	2	0	0	2	0	0	0	0	0	0	0	0	1	0	1	0	0	0	0	0
3	4	64267.8	64359.3	91.44	19.4098	PRICKLE2;	4	0	0	4	0	0	0	0	0	0	0	1	1	1	1	0	0	0	0	0
10	2	65791.3	65845.9	54.524	19.4068	RP11-174J11.1;	3	0	0	3	0	0	0	0	0	0	0	0	1	1	1	0	0	0	0	0
15	7	69132.2	69219.6	87.472	19.4045	SPESP1;	4	0	0	4	0	0	0	0	0	0	0	1	1	1	1	0	0	0	0	0
2	21	179907	180030	123.325	19.3329	CCDC141;SESTD1;	0	4	0	0	4	0	0	0	0	0	0	0	0	0	0	1	1	1	0	1
13	6	68310.9	68359.9	49.047	19.3289	BCRP9;	3	1	0	3	1	0	0	0	0	0	0	1	0	1	1	0	0	1	0	0
8	14	111776	112028	252.427	19.304	KB-1299A7.2;NDUFB9P3;LINC01608;	2	0	0	2	0	0	0	0	0	0	0	1	0	1	0	0	0	0	0	0
5	7	64881.2	64990.4	109.262	19.3011	PPWD1;TRIM23;CTC-534A2.2;TRAPPC13;SGTB;	4	5	0	4	5	0	0	0	0	0	0	1	1	1	1	1	1	1	1	1
15	9	74641.5	74951.4	309.893	19.295	CYP11A1;SEMA7A;UBL7;UBL7-AS1;CLK3;EDC3;	3	0	0	3	0	0	0	0	0	0	0	1	1	0	1	0	0	0	0	0
7	17	143816	143896	80.317	19.1099	OR2A15P;OR2A14;OR2A13P;ARHGEF35;	4	1	0	4	1	0	0	0	0	0	0	1	1	1	1	0	0	0	0	1
5	3	24439.8	24445.4	5.628	19.0945		3	0	0	3	0	0	0	0	0	0	0	0	1	1	1	0	0	0	0	0
13	1	34368.9	34420	51.072	19.0794	RFC3;	4	0	0	4	0	0	0	0	0	0	0	1	1	1	1	0	0	0	0	0
13	3	41396.9	41495.9	98.996	19.0226	TPTE2P5;CYCSP34;SUGT1P3;	2	0	0	2	0	0	0	0	0	0	0	0	1	0	1	0	0	0	0	0
17	7	75910.9	75959.8	48.967	18.9812	RNU1-80P;	2	0	0	2	0	0	0	0	0	0	0	1	1	0	0	0	0	0	0	0
2	12	140265	140296	30.495	18.9672	SNORA72;	3	0	0	3	0	0	0	0	0	0	0	1	1	0	1	0	0	0	0	0
14	6	61942.8	62224.7	281.919	18.8379	PRKCH;RP11-47I22.4;FLJ22447;HIF1A-AS1;SNAPC1;	4	1	0	4	1	0	0	0	0	0	0	1	1	1	1	1	0	0	0	0
5	18	144960	145050	89.331	18.8294	PRELID2;	3	0	0	3	0	0	0	0	0	0	0	1	0	1	1	0	0	0	0	0
4	2	25200.6	25281.9	81.364	18.8047	PI4K2B;RP11-660M5.1;	3	0	0	3	0	0	0	0	0	0	0	1	1	1	0	0	0	0	0	0
10	4	69011.8	69877.6	865.789	18.7913	CTNNA3;HERC4;MYPN;	3	4	2	3	2	1	0	0	0	1	0	1	1	0	1	0	1	1	0	0
15	6	53403.9	53424.6	20.717	18.7691	RP11-209E8.1;	2	0	0	2	0	0	0	0	0	0	0	0	0	1	1	0	0	0	0	0
6	19	121370	121419	48.728	18.7204	TBC1D32;	2	0	0	2	0	0	0	0	0	0	0	0	1	1	0	0	0	0	0	0
7	11	120022	120164	142.447	18.7006	KCND2;	4	0	0	4	0	0	0	0	0	0	0	1	1	1	1	0	0	0	0	0
13	5	58626.2	58626.2	0.059	18.6088		1	0	0	1	0	0	0	0	0	0	0	0	0	0	1	0	0	0	0	0
5	20	167178	167264	85.897	18.5917	TENM2;	4	0	0	4	0	0	0	0	0	0	0	1	1	1	1	0	0	0	0	0
2	0	13448	14312	864.001	18.5679	AC092635.1;LINC00276;	4	3	0	4	3	0	0	0	0	0	0	1	1	1	1	1	0	1	0	1
2	28	223898	223974	76.737	18.5311	KCNE4;	2	0	0	2	0	0	0	0	0	0	0	0	1	1	0	0	0	0	0	0
3	15	160579	160652	72.297	18.4855	PPM1L;	3	0	0	3	0	0	0	0	0	0	0	1	1	1	0	0	0	0	0	0
10	3	68088.3	68170.9	82.599	18.3985	CTNNA3;	4	0	0	4	0	0	0	0	0	0	0	1	1	1	1	0	0	0	0	0
17	5	58827	58922	94.989	18.2717	BCAS3;	4	3	0	4	3	0	0	0	0	0	0	1	1	1	1	1	0	1	0	1
12	3	42189.3	42338.3	148.99	18.2587	RP11-630C16.2;	4	1	0	4	1	0	0	0	0	0	0	1	1	1	1	0	0	0	0	1
2	15	157740	157759	18.074	18.252		2	0	0	2	0	0	0	0	0	0	0	0	1	1	0	0	0	0	0	0
5	8	82376.9	82478	101.07	18.2274	XRCC4;	4	2	0	4	2	0	0	0	0	0	0	1	1	1	1	0	1	0	1	0
4	1	5280.26	5343.67	63.414	18.2176	STK32B;	3	3	0	3	3	0	0	0	0	0	0	0	1	1	1	1	1	0	0	1
19	0	7430.01	7478.39	48.382	18.214	CTB-133G6.1;CTD-2207O23.3;	3	0	0	3	0	0	0	0	0	0	0	0	1	1	1	0	0	0	0	0
1	15	182777	182859	82.113	18.2015	NPL;DHX9;	0	0	0	0	0	0	0	0	0	0	0	0	0	0	0	0	0	0	0	0
6	16	105585	105652	67.174	18.1884	BVES;BVES-AS1;POPDC3;	4	3	0	4	3	0	0	0	0	0	0	1	1	1	1	1	0	1	0	1
14	12	102563	102663	100.04	18.1108	HSP90AA1;WDR20;	1	1	1	1	0	0	0	0	0	1	0	0	0	0	1	0	0	0	0	0
11	15	129822	129998	175.382	18.0807	PRDM10;RP11-567M21.3;TCEB2P2;RP11-679I18.4;APLP2;	3	0	0	3	0	0	0	0	0	0	0	1	0	1	1	0	0	0	0	0
12	4	43805.2	43901.8	96.639	18.0744	ADAMTS20;	1	1	0	1	1	0	0	0	0	0	0	0	1	0	0	0	0	1	0	0
7	6	72086.1	72181.1	95	18.0719	MIR4650-2;	4	0	0	4	0	0	0	0	0	0	0	1	1	1	1	0	0	0	0	0
2	9	116289	116312	23.091	18.042	DPP10;	2	0	0	2	0	0	0	0	0	0	0	0	0	1	1	0	0	0	0	0
16	3	78457.1	78486.1	29.044	18.0404	WWOX;	3	0	0	3	0	0	0	0	0	0	0	0	1	1	1	0	0	0	0	0
8	18	119958	120057	99.194	17.9753	TNFRSF11B;RNU6-12P;RP11-278I4.1;COLEC10;	1	2	0	1	2	0	0	0	0	0	0	0	0	1	0	0	1	0	1	0
8	19	129324	129413	88.879	17.9418	LINC00824;	2	0	0	2	0	0	0	0	0	0	0	1	0	0	1	0	0	0	0	0
4	17	152136	152208	71.843	17.9411	SH3D19;RP11-731D1.1;PRSS48;	0	0	0	0	0	0	0	0	0	0	0	0	0	0	0	0	0	0	0	0
6	5	31177.1	31324.2	147.06	17.8936	XXbac-BPG299F13.15;XXbac-BPG299F13.16;HLA-C;RPL3P2;USP8P1;WASF5P;XXbac-BPG248L24.13;XXbac-BPG248L24.10;HLA-B;	0	4	2	0	2	1	0	0	0	1	0	0	0	0	0	1	0	1	0	0
10	12	112667	112760	92.407	17.8773	BBIP1;SHOC2;	4	2	0	4	2	0	0	0	0	0	0	1	1	1	1	1	0	0	0	1
13	4	44389.5	44467.2	77.731	17.8639	CCDC122;LACC1;	3	0	0	3	0	0	0	0	0	0	0	1	1	1	0	0	0	0	0	0
3	21	194478	194512	33.417	17.8606	AC090505.6;	2	0	0	2	0	0	0	0	0	0	0	0	1	1	0	0	0	0	0	0
3	17	165402	165528	125.535	17.8434	BCHE;	3	3	0	3	3	0	0	0	0	0	0	1	1	1	0	1	0	0	1	1
17	2	15443.7	15520.3	76.597	17.834	TVP23C-CDRT4;RP11-385D13.1;	4	0	0	4	0	0	0	0	0	0	0	1	1	1	1	0	0	0	0	0
7	3	19571.6	19663.6	92.076	17.7488	AC007091.1;	1	0	0	1	0	0	0	0	0	0	0	0	0	0	1	0	0	0	0	0
12	8	53488.2	53548	59.794	17.7361	IGFBP6;SOAT2;VTI1BP3;HIGD1AP1;RNU6-333P;EIF4A1P4;CSAD;	3	0	0	3	0	0	0	0	0	0	0	0	1	1	1	0	0	0	0	0
5	4	33867.4	33944.2	76.798	17.5796	ADAMTS12;RXFP3;SLC45A2;	1	0	0	1	0	0	0	0	0	0	0	0	0	0	1	0	0	0	0	0
4	7	41443.3	42139.1	695.782	17.5597	LIMCH1;SLC30A9;BEND4;	4	5	1	4	4	0	1	0	0	0	0	1	1	1	1	1	0	1	1	1
14	5	52951.5	53060	108.507	17.5018	TXNDC16;GPR137C;	2	0	0	2	0	0	0	0	0	0	0	0	1	0	1	0	0	0	0	0
2	4	72405.8	72596.9	191.109	17.5013	EXOC6B;	4	1	1	4	0	0	1	0	0	0	0	1	1	1	1	0	0	0	0	0
2	26	219420	219807	386.913	17.4795	USP37;CNOT9;PLCD4;WNT6;WNT10A;LINC01494;AC097468.7;	4	5	0	4	5	0	0	0	0	0	0	1	1	1	1	1	1	1	1	1
1	13	93687.1	93805.2	118.11	17.4578	CCDC18;CCDC18-AS1;	1	1	1	1	0	0	0	1	0	0	0	0	0	0	1	0	0	0	0	0
1	9	75426.5	75434.4	7.916	17.4081	RP11-93N20.1;	4	3	0	4	3	0	0	0	0	0	0	1	1	1	1	0	1	1	1	0
3	3	40755.5	40825.8	70.284	17.387	RP11-761N21.1;	1	0	0	1	0	0	0	0	0	0	0	0	0	1	0	0	0	0	0	0
1	20	219194	219223	29.242	17.3534		4	0	0	4	0	0	0	0	0	0	0	1	1	1	1	0	0	0	0	0
11	11	88930.4	89029	98.592	17.3448	TYR;	3	0	0	3	0	0	0	0	0	0	0	0	1	1	1	0	0	0	0	0
18	7	50152.2	50229.3	77.08	17.2941	DCC;	2	0	0	2	0	0	0	0	0	0	0	0	1	1	0	0	0	0	0	0
6	11	43990.2	44019.2	29.004	17.2933	RP5-1120P11.1;	3	0	0	3	0	0	0	0	0	0	0	1	1	1	0	0	0	0	0	0
4	16	142945	142993	48.346	17.2891	INPP4B;	0	0	0	0	0	0	0	0	0	0	0	0	0	0	0	0	0	0	0	0
6	17	107953	107985	32.297	17.2881	SOBP;	3	0	0	3	0	0	0	0	0	0	0	0	1	1	1	0	0	0	0	0
12	10	70616	70676	60.024	17.2431	LINC01481;CNOT2;	3	0	0	3	0	0	0	0	0	0	0	1	1	0	1	0	0	0	0	0
8	16	115335	115819	484.424	17.2219	RP11-393K19.1;CARSP2;	4	0	0	4	0	0	0	0	0	0	0	1	1	1	1	0	0	0	0	0
8	13	93757.4	93833.1	75.655	17.1489	FLJ46284;RP11-100L22.3;	2	0	0	2	0	0	0	0	0	0	0	0	0	1	1	0	0	0	0	0
2	24	196370	196770	399.912	17.1457	RP11-762E8.1;AC064834.2;AC064834.3;AHCYP5;SLC39A10;DNAH7;	2	0	0	2	0	0	0	0	0	0	0	0	1	1	0	0	0	0	0	0
14	9	71204.2	71278.7	74.538	17.1145	MAP3K9;	2	0	0	2	0	0	0	0	0	0	0	0	0	1	1	0	0	0	0	0
6	14	81199.8	81684.6	484.822	17.1137	RP11-11L12.2;RP11-486E2.1;	4	2	0	4	2	0	0	0	0	0	0	1	1	1	1	0	1	1	0	0
18	2	12976.6	13047.8	71.224	17.0763	SEH1L;CEP192;	0	0	0	0	0	0	0	0	0	0	0	0	0	0	0	0	0	0	0	0
12	13	80898.1	80957.9	59.837	17.0722	PTPRQ;	1	0	0	1	0	0	0	0	0	0	0	1	0	0	0	0	0	0	0	0
5	15	128794	128965	171.182	16.9726	ADAMTS19;	1	3	0	1	3	0	0	0	0	0	0	0	0	0	1	0	1	1	0	1
6	12	62455.1	62539.7	84.687	16.9572	KHDRBS2;	2	1	1	2	0	0	0	1	0	0	0	0	1	0	1	0	0	0	0	0
8	12	89622.6	89706.6	83.921	16.9492	RP11-586K2.1;	3	0	0	3	0	0	0	0	0	0	0	1	1	1	0	0	0	0	0	0
3	2	19963.3	20051	87.686	16.9235	EFHB;HSPA8P18;RAB5A;PP2D1;	0	1	0	0	1	0	0	0	0	0	0	0	0	0	0	1	0	0	0	0
15	8	72117.1	72726.2	609.066	16.9187	MYO9A;RP11-1007O24.3;	3	0	0	3	0	0	0	0	0	0	0	1	1	1	0	0	0	0	0	0
2	8	102981	103020	38.833	16.9149	IL18R1;	0	3	2	0	1	1	0	0	0	1	0	0	0	0	0	0	1	0	0	0
16	1	67466.4	67515.3	48.882	16.9001	HSD11B2;ATP6V0D1;	3	0	0	3	0	0	0	0	0	0	0	0	1	1	1	0	0	0	0	0
4	4	31032.6	31101.2	68.553	16.8094	PCDH7;	2	0	0	2	0	0	0	0	0	0	0	0	1	1	0	0	0	0	0	0
5	11	112568	112628	59.524	16.7684	MCC;	3	0	0	3	0	0	0	0	0	0	0	0	1	1	1	0	0	0	0	0
6	21	132199	132246	46.963	16.7547	ENPP1;RP11-69I8.2;	0	0	0	0	0	0	0	0	0	0	0	0	0	0	0	0	0	0	0	0
14	11	100473	100533	60.807	16.6657	EVL;CTD-2376I20.1;	4	0	0	4	0	0	0	0	0	0	0	1	1	1	1	0	0	0	0	0
2	17	163505	163589	84.4	16.6577	KCNH7;	3	0	0	3	0	0	0	0	0	0	0	0	1	1	1	0	0	0	0	0
2	5	74531.4	74612.4	80.959	16.6505	SLC4A5;RP11-287D1.3;DCTN1;	1	0	0	1	0	0	0	0	0	0	0	0	0	0	1	0	0	0	0	0
19	3	39813.9	39850.8	36.983	16.6396	GMFG;SAMD4B;	2	1	0	2	1	0	0	0	0	0	0	1	0	0	1	0	0	1	0	0
11	12	99654.8	99721.6	66.796	16.6369	CNTN5;	3	0	0	3	0	0	0	0	0	0	0	0	1	1	1	0	0	0	0	0
11	13	116859	116934	75.437	16.6355	SIK3;	2	0	0	2	0	0	0	0	0	0	0	0	0	1	1	0	0	0	0	0
8	15	114162	114698	535.596	16.595	CSMD3;	2	5	5	2	0	1	1	1	1	1	0	1	1	0	0	0	0	0	0	0
13	7	84451.5	84518.1	66.607	16.591	SLITRK1;VENTXP2;	3	0	0	3	0	0	0	0	0	0	0	0	1	1	1	0	0	0	0	0
12	5	44440.2	44764.4	324.199	16.5624	TMEM117;	3	5	0	3	5	0	0	0	0	0	0	1	1	1	0	1	1	1	1	1
13	0	25838.9	25876	37.121	16.5068	MTMR6;NUP58;	1	0	0	1	0	0	0	0	0	0	0	0	0	0	1	0	0	0	0	0
4	3	30271.7	30271.7	0	16.5065		1	0	0	1	0	0	0	0	0	0	0	0	0	0	1	0	0	0	0	0
5	9	96947.4	96964.5	17.1	16.5045	LINC01340;	4	1	1	4	0	0	1	0	0	0	0	1	1	1	1	0	0	0	0	0
6	1	2266.35	2318.45	52.102	16.4598	GMDS-AS1;	0	0	0	0	0	0	0	0	0	0	0	0	0	0	0	0	0	0	0	0
3	1	11311.9	11375.2	63.284	16.4589	ATG7;	2	0	0	2	0	0	0	0	0	0	0	0	1	1	0	0	0	0	0	0
9	3	80207.6	80267.6	60.082	16.4095	GNA14;	0	0	0	0	0	0	0	0	0	0	0	0	0	0	0	0	0	0	0	0
15	13	93997.2	94034.2	36.992	16.4012	RP11-266O8.1;	2	0	0	2	0	0	0	0	0	0	0	0	0	1	1	0	0	0	0	0
12	9	55506.5	55528.1	21.665	16.3964	OR9K1P;OR9K2;	3	0	0	3	0	0	0	0	0	0	0	1	0	1	1	0	0	0	0	0
12	6	48455.3	48488.4	33.117	16.3936	SENP1;	3	0	0	3	0	0	0	0	0	0	0	1	1	0	1	0	0	0	0	0
4	20	165492	165518	25.928	16.374	RP11-75A5.1;	1	0	0	1	0	0	0	0	0	0	0	0	1	0	0	0	0	0	0	0
6	0	177.899	180.959	3.06	16.3196	RP3-416J7.4;	2	0	0	2	0	0	0	0	0	0	0	0	1	1	0	0	0	0	0	0
1	17	194032	194417	384.324	16.286		3	0	0	3	0	0	0	0	0	0	0	0	1	1	1	0	0	0	0	0
11	5	68685.8	68754.9	69.078	16.2692	IGHMBP2;RP11-757G1.5;MRGPRD;	3	0	0	3	0	0	0	0	0	0	0	1	0	1	1	0	0	0	0	0
2	1	21903.5	21961	57.444	16.2648	AC018742.1;AC067959.1;	0	1	0	0	1	0	0	0	0	0	0	0	0	0	0	0	1	0	0	0
9	2	72791.8	72873.3	81.487	16.2487	MAMDC2;SMC5-AS1;	1	0	0	1	0	0	0	0	0	0	0	0	0	0	1	0	0	0	0	0
11	6	71047.8	71075.6	27.784	16.1945		3	0	0	3	0	0	0	0	0	0	0	1	1	1	0	0	0	0	0	0
2	6	76307.3	76337.9	30.516	16.1716	SUCLA2P2;	2	1	0	2	1	0	0	0	0	0	0	0	1	1	0	0	0	0	0	1
5	0	908.934	922.545	13.611	16.1689	TRIP13;	1	0	0	1	0	0	0	0	0	0	0	0	0	0	1	0	0	0	0	0
14	13	106825	106833	7.58	16.1659	IGHV3-33-2;IGHV4-34;	4	0	0	4	0	0	0	0	0	0	0	1	1	1	1	0	0	0	0	0
11	1	11820.4	11886.6	66.168	16.1616	USP47;	0	0	0	0	0	0	0	0	0	0	0	0	0	0	0	0	0	0	0	0
5	13	122283	122369	85.844	16.1417	SNX24;RN7SL689P;PPIC;	3	0	0	3	0	0	0	0	0	0	0	0	1	1	1	0	0	0	0	0
6	13	72191.9	72264.7	72.865	16.0417	RP1-288M22.1;	1	1	0	1	1	0	0	0	0	0	0	0	1	0	0	0	0	1	0	0
1	4	49738.9	49814.4	75.488	16.0145	AGBL4;	1	0	0	1	0	0	0	0	0	0	0	0	0	0	1	0	0	0	0	0
3	7	111906	111947	40.562	15.9999	SLC9C1;	3	0	0	3	0	0	0	0	0	0	0	1	1	1	0	0	0	0	0	0
4	18	156194	156219	25.653	15.9951	AC097467.2;RP11-27G13.1;	2	2	0	2	2	0	0	0	0	0	0	0	0	1	1	1	0	1	0	0
6	15	84615.5	84655.6	40.125	15.9901	CYB5R4;	1	0	0	1	0	0	0	0	0	0	0	0	0	0	1	0	0	0	0	0
4	11	87093.4	87168.1	74.648	15.964	MAPK10;	1	1	0	1	1	0	0	0	0	0	0	1	0	0	0	0	0	0	0	1
4	12	104062	104107	45.281	15.9603	CENPE;	0	1	0	0	1	0	0	0	0	0	0	0	0	0	0	1	0	0	0	0
15	12	92109.1	92153.1	43.975	15.9391	CRAT37;	1	0	0	1	0	0	0	0	0	0	0	0	0	1	0	0	0	0	0	0
3	0	1046.04	1059.21	13.177	15.9355	AC087430.1;	2	0	0	2	0	0	0	0	0	0	0	1	1	0	0	0	0	0	0	0
3	14	154495	154541	46.796	15.9348	RP11-439C8.1;	1	1	0	1	1	0	0	0	0	0	0	0	0	0	1	0	1	0	0	0
19	1	12371.6	12385	13.414	15.894	CTD-2666L21.3;ZNF44;	1	0	0	1	0	0	0	0	0	0	0	0	0	0	1	0	0	0	0	0
7	14	132697	132740	43.48	15.8267	CHCHD3;	1	3	3	1	0	1	0	0	1	1	0	0	1	0	0	0	0	0	0	0
7	12	129344	129357	13.331	15.7946	NRF1;	3	0	0	3	0	0	0	0	0	0	0	1	0	1	1	0	0	0	0	0
5	6	61117.4	61133.1	15.645	15.7908	CTD-2244C20.1;	0	0	0	0	0	0	0	0	0	0	0	0	0	0	0	0	0	0	0	0
8	2	17647.9	17734.2	86.297	15.7796	MTUS1;RP11-156K13.1;RP11-806O11.1;FGL1;	0	0	0	0	0	0	0	0	0	0	0	0	0	0	0	0	0	0	0	0
15	5	52522.6	52776.9	254.338	15.7672	MYO5C;MYO5A;	4	0	0	4	0	0	0	0	0	0	0	1	1	1	1	0	0	0	0	0
3	5	94903	94903.2	0.116	15.7506		2	0	0	2	0	0	0	0	0	0	0	0	1	0	1	0	0	0	0	0
15	11	86909	86966.7	57.695	15.7488	AGBL1;	2	1	0	2	1	0	0	0	0	0	0	0	1	1	0	0	0	0	1	0
13	9	99955.5	99986	30.495	15.7348	GPR183;UBAC2;	1	0	0	1	0	0	0	0	0	0	0	0	0	1	0	0	0	0	0	0
4	13	114817	114848	31.455	15.7307	ARSJ;	1	0	0	1	0	0	0	0	0	0	0	0	1	0	0	0	0	0	0	0
8	11	62525.9	62991.4	465.518	15.7131	ASPH;	1	0	0	1	0	0	0	0	0	0	0	0	0	0	1	0	0	0	0	0
7	18	155575	155617	41.788	15.6828	RBM33;SHH;	1	0	0	1	0	0	0	0	0	0	0	1	0	0	0	0	0	0	0	0
18	4	21030.4	21094.2	63.801	15.679	RIOK3;C18orf8;	0	0	0	0	0	0	0	0	0	0	0	0	0	0	0	0	0	0	0	0
18	1	11746.6	11776.3	29.699	15.6788	GNAL;	0	0	0	0	0	0	0	0	0	0	0	0	0	0	0	0	0	0	0	0
7	15	137227	137230	2.857	15.6384	DGKI;	3	1	0	3	1	0	0	0	0	0	0	0	1	1	1	0	0	0	0	1
3	8	112549	112577	28.914	15.6241	CD200R1L;	2	0	0	2	0	0	0	0	0	0	0	0	1	0	1	0	0	0	0	0
5	5	37955.3	37971	15.697	15.5982	CTD-2130F23.1;	1	0	0	1	0	0	0	0	0	0	0	0	0	0	1	0	0	0	0	0
1	2	10097.7	10122	24.298	15.5961	UBE4B;	0	0	0	0	0	0	0	0	0	0	0	0	0	0	0	0	0	0	0	0
7	1	14964.9	15113.1	148.163	15.5824	DGKB;AC006458.3;	2	0	0	2	0	0	0	0	0	0	0	0	0	1	1	0	0	0	0	0
10	0	16786.1	16798.4	12.362	15.5723	RSU1;	0	0	0	0	0	0	0	0	0	0	0	0	0	0	0	0	0	0	0	0
6	9	37835.6	37869.7	34.062	15.5529	ZFAND3;	3	0	0	3	0	0	0	0	0	0	0	1	1	1	0	0	0	0	0	0
3	18	174693	174731	37.545	15.55	NAALADL2;	2	0	0	2	0	0	0	0	0	0	0	0	1	1	0	0	0	0	0	0
2	14	155942	156002	60.375	15.527	RNU6-1001P;	2	5	5	2	0	1	1	1	1	1	0	0	0	1	1	0	0	0	0	0
7	9	101029	101058	29.907	15.5245	COL26A1;	2	0	0	2	0	0	0	0	0	0	0	1	1	0	0	0	0	0	0	0
12	11	72040.8	72084.1	43.317	15.5226	ZFC3H1;THAP2;TMEM19;	3	0	0	3	0	0	0	0	0	0	0	0	1	1	1	0	0	0	0	0
14	4	47639	48147.3	508.388	15.5202	MDGA2;	0	1	0	0	1	0	0	0	0	0	0	0	0	0	0	0	0	0	0	1
1	1	6434.53	6445.26	10.732	15.5129	ACOT7;	3	1	0	3	1	0	0	0	0	0	0	1	0	1	1	1	0	0	0	0
3	19	182591	182599	7.836	15.4957	ATP11B;	0	0	0	0	0	0	0	0	0	0	0	0	0	0	0	0	0	0	0	0
15	10	79198.4	79224.7	26.27	15.4826	CTSH;	2	0	0	2	0	0	0	0	0	0	0	0	1	1	0	0	0	0	0	0
12	17	103714	103733	18.46	15.4823	C12orf42;	0	0	0	0	0	0	0	0	0	0	0	0	0	0	0	0	0	0	0	0
12	20	113209	113219	9.936	15.4805	RPH3A;	2	0	0	2	0	0	0	0	0	0	0	0	0	1	1	0	0	0	0	0
1	8	66298.2	66310.7	12.528	15.4707	PDE4B;	0	0	0	0	0	0	0	0	0	0	0	0	0	0	0	0	0	0	0	0
12	15	95630.7	95671.3	40.666	15.4698	VEZT;	0	1	0	0	1	0	0	0	0	0	0	0	0	0	0	0	0	0	1	0
12	12	74408	74444.5	36.498	15.4522	RP11-711C17.2;	0	6	2	0	4	1	0	0	0	1	0	0	0	0	0	1	0	1	1	1
17	0	6640.01	6640.01	0	15.4482		0	0	0	0	0	0	0	0	0	0	0	0	0	0	0	0	0	0	0	0
3	22	196899	196930	31.19	15.4392	DLG1;	0	0	0	0	0	0	0	0	0	0	0	0	0	0	0	0	0	0	0	0
5	2	23327	23381.5	54.52	15.4273	CTD-2272G21.1;	0	0	0	0	0	0	0	0	0	0	0	0	0	0	0	0	0	0	0	0
7	13	132131	132140	8.551	15.3742	PLXNA4;	2	0	0	2	0	0	0	0	0	0	0	0	0	1	1	0	0	0	0	0
8	7	51412.1	51470.6	58.468	15.3585	SNTG1;	1	2	0	1	2	0	0	0	0	0	0	0	1	0	0	1	0	0	0	1
6	3	25840.5	25868.2	27.741	15.3328	SLC17A3;	1	1	0	1	1	0	0	0	0	0	0	0	0	0	1	0	0	0	1	0
2	29	238433	238457	23.889	15.3125	MLPH;	3	0	0	3	0	0	0	0	0	0	0	1	0	1	1	0	0	0	0	0
9	6	111011	111023	11.081	15.3093	RP11-505C13.1;	0	0	0	0	0	0	0	0	0	0	0	0	0	0	0	0	0	0	0	0
18	10	67778.6	67791.7	13.162	15.3049	RTTN;	1	0	0	1	0	0	0	0	0	0	0	1	0	0	0	0	0	0	0	0
14	0	22231.8	22301.2	69.416	15.3019	TRAV6;TRAV7;TRAV8-1;TRAV9-1;TRAV10;TRAV11;	3	0	0	3	0	0	0	0	0	0	0	0	1	1	1	0	0	0	0	0
3	20	184928	184937	8.318	15.2947	EHHADH;	1	0	0	1	0	0	0	0	0	0	0	0	0	1	0	0	0	0	0	0
11	2	35069	35133.6	64.605	15.2935		3	0	0	3	0	0	0	0	0	0	0	0	1	1	1	0	0	0	0	0
11	9	83265.5	83324.5	58.948	15.2809	DLG2;	0	0	0	0	0	0	0	0	0	0	0	0	0	0	0	0	0	0	0	0
14	3	40851.1	40887.3	36.155	15.2767	RP11-662J14.2;	2	0	0	2	0	0	0	0	0	0	0	1	1	0	0	0	0	0	0	0
11	10	88319.3	88379.7	60.449	15.2607	GRM5;	4	2	0	4	2	0	0	0	0	0	0	1	1	1	1	1	0	0	0	1
7	0	6783.46	6820.39	36.923	15.2557	PMS2CL;RSPH10B2;	2	0	0	2	0	0	0	0	0	0	0	0	0	1	1	0	0	0	0	0
20	1	17555.4	17620.4	64.971	15.2392	DSTN;RRBP1;	2	0	0	2	0	0	0	0	0	0	0	1	1	0	0	0	0	0	0	0
11	14	126129	126153	23.544	15.1781	FAM118B;SRPRA;FOXRED1;TIRAP;	1	3	3	1	0	1	1	0	1	0	0	0	0	0	1	0	0	0	0	0
6	7	33096.4	33166	69.608	15.1291	HLA-DPB2;HLA-DPA3;HCG24;COL11A2;RXRB;	1	5	5	1	0	1	1	1	1	1	0	1	0	0	0	0	0	0	0	0
21	1	30021.7	30195.3	173.541	15.122	AF131217.1;	4	0	0	4	0	0	0	0	0	0	0	1	1	1	1	0	0	0	0	0
1	7	61006	61025.7	19.686	15.121	RP11-776H12.1;	1	0	0	1	0	0	0	0	0	0	0	0	0	0	1	0	0	0	0	0
10	9	97396	97415.5	19.493	15.0936	ALDH18A1;	0	0	0	0	0	0	0	0	0	0	0	0	0	0	0	0	0	0	0	0
2	22	189931	189971	40.444	15.086	COL5A2;	3	4	0	3	4	0	0	0	0	0	0	1	1	0	1	1	1	1	1	0
2	27	221109	221131	22.147	15.0661	AC114765.1;	2	0	0	2	0	0	0	0	0	0	0	0	1	0	1	0	0	0	0	0
14	10	82919.4	82933.5	14.17	15.0514		1	0	0	1	0	0	0	0	0	0	0	0	1	0	0	0	0	0	0	0
22	1	28441.5	28462.8	21.285	15.0467	TTC28;	1	0	0	1	0	0	0	0	0	0	0	1	0	0	0	0	0	0	0	0
9	0	13688.7	13689.1	0.4	15.0443		2	0	0	2	0	0	0	0	0	0	0	0	0	1	1	0	0	0	0	0
8	6	42197.7	42228.6	30.871	14.996	POLB;	3	0	0	3	0	0	0	0	0	0	0	0	1	1	1	0	0	0	0	0
4	9	72928.7	73018	89.276	14.9774	NPFFR2;	4	0	0	4	0	0	0	0	0	0	0	1	1	1	1	0	0	0	0	0
6	6	32220.5	32409.2	188.758	14.9696	XXbac-BPG154L12.4;HLA-DRA;	0	5	5	0	0	1	1	1	1	1	0	0	0	0	0	0	0	0	0	0
17	4	53917.9	53929.1	11.231	14.9614	RP11-763E3.1;	1	0	0	1	0	0	0	0	0	0	0	0	0	0	1	0	0	0	0	0
5	16	131573	131605	31.708	14.9502	P4HA2;PDLIM4;	3	0	0	3	0	0	0	0	0	0	0	0	1	1	1	0	0	0	0	0
12	0	403.545	409.437	5.892	14.9431	KDM5A;	1	0	0	1	0	0	0	0	0	0	0	0	0	1	0	0	0	0	0	0
1	6	56292.3	56330.9	38.606	14.9055		0	0	0	0	0	0	0	0	0	0	0	0	0	0	0	0	0	0	0	0
3	12	138918	138933	15.274	14.9003	MRPS22;	0	0	0	0	0	0	0	0	0	0	0	0	0	0	0	0	0	0	0	0
4	22	174934	174969	35.061	14.893		1	0	0	1	0	0	0	0	0	0	0	0	1	0	0	0	0	0	0	0
12	16	97958.1	97958.2	0.091	14.8648	RMST;	1	0	0	1	0	0	0	0	0	0	0	0	1	0	0	0	0	0	0	0
10	1	27428.7	27439.9	11.226	14.8568	YME1L1;	0	0	0	0	0	0	0	0	0	0	0	0	0	0	0	0	0	0	0	0
16	0	22157	22199.3	42.347	14.8515	VWA3A;SDR42E2;	0	0	0	0	0	0	0	0	0	0	0	0	0	0	0	0	0	0	0	0
13	8	98587.9	98595.2	7.295	14.8423	RP11-383H17.4;	0	0	0	0	0	0	0	0	0	0	0	0	0	0	0	0	0	0	0	0
20	0	8003.59	8022.85	19.257	14.8241	TMX4;RP5-971N18.3;	3	0	0	3	0	0	0	0	0	0	0	1	1	1	0	0	0	0	0	0
18	3	19228.2	19263.1	34.954	14.8205	ABHD3;	0	0	0	0	0	0	0	0	0	0	0	0	0	0	0	0	0	0	0	0
3	10	130160	130178	17.849	14.8092	COL6A5;	4	1	0	4	1	0	0	0	0	0	0	1	1	1	1	0	1	0	0	0
2	23	190661	190685	23.666	14.8089	PMS1;	3	0	0	3	0	0	0	0	0	0	0	1	1	0	1	0	0	0	0	0
10	8	85144.2	85144.2	0	14.8055		1	0	0	1	0	0	0	0	0	0	0	0	0	1	0	0	0	0	0	0
3	16	162822	162863	40.28	14.8003	RP11-10O22.1;RP11-535I24.2;	3	2	1	3	1	0	0	0	0	1	0	0	1	1	1	0	0	0	0	1
7	4	24577.2	24579.4	2.209	14.7902	RNU6-1103P;	4	0	0	4	0	0	0	0	0	0	0	1	1	1	1	0	0	0	0	0
17	3	33946.1	33959.5	13.424	14.7806	AP2B1;	0	0	0	0	0	0	0	0	0	0	0	0	0	0	0	0	0	0	0	0
6	10	39575.9	39590.8	14.922	14.7723	KIF6;	4	0	0	4	0	0	0	0	0	0	0	1	1	1	1	0	0	0	0	0
7	2	16254.6	16296.4	41.752	14.7696	ISPD;	1	0	0	1	0	0	0	0	0	0	0	0	0	1	0	0	0	0	0	0
21	0	21107.2	21108.1	0.98	14.7535	AP000568.2;	1	0	0	1	0	0	0	0	0	0	0	0	1	0	0	0	0	0	0	0
8	5	39346.1	39367.7	21.605	14.7369	ADAM3A;	2	1	0	2	1	0	0	0	0	0	0	0	0	1	1	1	0	0	0	0
17	1	9546.55	9555.38	8.826	14.701	USP43;	3	0	0	3	0	0	0	0	0	0	0	0	1	1	1	0	0	0	0	0
1	16	185604	185604	0	14.6909		1	0	0	1	0	0	0	0	0	0	0	0	0	0	1	0	0	0	0	0
4	15	131341	131400	59.843	14.6612		4	0	0	4	0	0	0	0	0	0	0	1	1	1	1	0	0	0	0	0
3	11	132372	132378	5.834	14.648	ACAD11;	0	0	0	0	0	0	0	0	0	0	0	0	0	0	0	0	0	0	0	0
4	14	124177	124186	8.807	14.6252	SPATA5;	3	0	0	3	0	0	0	0	0	0	0	1	1	1	0	0	0	0	0	0
1	11	77746.5	77758.9	12.422	14.6174	AK5;	0	0	0	0	0	0	0	0	0	0	0	0	0	0	0	0	0	0	0	0
8	4	36945.1	36956.6	11.439	14.5991	SMARCE1P4;	0	0	0	0	0	0	0	0	0	0	0	0	0	0	0	0	0	0	0	0
9	1	16690.3	16696.5	6.194	14.5896	BNC2;	0	0	0	0	0	0	0	0	0	0	0	0	0	0	0	0	0	0	0	0
7	5	70921.2	70942.4	21.26	14.5895	WBSCR17;	0	0	0	0	0	0	0	0	0	0	0	0	0	0	0	0	0	0	0	0
11	8	73539.7	73573.6	33.861	14.5886	MRPL48;	2	1	0	2	1	0	0	0	0	0	0	0	0	1	1	0	0	0	0	1
20	4	39346.2	39357.7	11.485	14.5874		0	0	0	0	0	0	0	0	0	0	0	0	0	0	0	0	0	0	0	0
18	11	70814	70825.1	11.152	14.5726	RP11-169F17.1;	0	0	0	0	0	0	0	0	0	0	0	0	0	0	0	0	0	0	0	0
14	1	24475.3	24479.3	3.964	14.5681	DHRS4L2;	2	0	0	2	0	0	0	0	0	0	0	0	1	0	1	0	0	0	0	0
20	2	30929.2	30944.3	15.066	14.5052	ASXL1;	0	0	0	0	0	0	0	0	0	0	0	0	0	0	0	0	0	0	0	0
10	6	81646.9	81669.2	22.305	14.5044	PGGT1BP2;MBL1P;	0	0	0	0	0	0	0	0	0	0	0	0	0	0	0	0	0	0	0	0
3	13	140296	140296	0	14.4994		0	0	0	0	0	0	0	0	0	0	0	0	0	0	0	0	0	0	0	0
6	20	122744	122747	3.436	14.4936	HSF2;	0	1	1	0	0	0	0	0	0	1	0	0	0	0	0	0	0	0	0	0
1	14	174298	174306	7.917	14.488	RABGAP1L;	2	0	0	2	0	0	0	0	0	0	0	1	0	1	0	0	0	0	0	0
5	19	154782	154796	14.843	14.4767	CTC-447K7.1;	0	3	0	0	3	0	0	0	0	0	0	0	0	0	0	1	0	1	0	1
16	2	77327.6	77331	3.391	14.4192	ADAMTS18;	0	0	0	0	0	0	0	0	0	0	0	0	0	0	0	0	0	0	0	0
5	14	127821	127821	0.718	14.4063	FBN2;	1	2	0	1	2	0	0	0	0	0	0	0	0	0	1	1	0	0	0	1
2	2	33013.4	33029.3	15.879	14.4058	TTC27;	0	0	0	0	0	0	0	0	0	0	0	0	0	0	0	0	0	0	0	0
15	0	25569.9	25572.8	2.939	14.3965	SNHG14;	1	0	0	1	0	0	0	0	0	0	0	0	0	0	1	0	0	0	0	0
22	2	30288.4	30451.5	163.088	14.3965	HORMAD2-AS1;	1	3	3	1	0	1	1	0	0	1	0	0	0	1	0	0	0	0	0	0
1	10	76209.8	76213	3.27	14.3621	ACADM;	0	2	0	0	2	0	0	0	0	0	0	0	0	0	0	0	0	1	1	0
11	0	8463.62	8463.95	0.329	14.3414	STK33;	0	0	0	0	0	0	0	0	0	0	0	0	0	0	0	0	0	0	0	0
13	2	38217.4	38217.4	0	14.318		1	0	0	1	0	0	0	0	0	0	0	0	1	0	0	0	0	0	0	0
18	9	66700.5	66700.5	0	14.3121		0	1	0	0	1	0	0	0	0	0	0	0	0	0	0	0	0	1	0	0
8	0	9593.75	9593.75	0	14.3091		1	1	1	1	0	1	0	0	0	0	0	0	0	0	1	0	0	0	0	0
18	6	26798.4	26798.4	0	14.3087		0	0	0	0	0	0	0	0	0	0	0	0	0	0	0	0	0	0	0	0

## Sheet: EUR-FIN
Chrsme	Block	Begin	End	Size (Kb)	max CSS	Genes	wth_sharing	btw_sharing	AFR_sharing	EUR_sharing	ASI_sharing	Share_ESN	Share_GWD	Share_LWK	Share_MSL	Share_YRI	Share_CEU	Share_FIN	Share_GBR	Share_IBS	Share_TSI	Share_CDX	Share_CHB	Share_CHS	Share_JPT	Share_KHV
2	15	134776	137583	2807.23	37.1452	MGAT5;TMEM163;CCNT2-AS1;VDAC2P4;AC110620.1;ACMSD;MAP3K19;RAB3GAP1;ZRANB3;R3HDM1;UBXN4;LCT;MCM6;AC011999.1;DARS;DARS-AS1;AC068492.1;HNRNPKP2;RN7SKP141;SMC4P1;THSD7B;	3	3	0	3	3	0	0	0	0	0	1	0	1	1	0	0	1	1	1	0
19	3	33516.4	33690	173.537	34.5297	RHPN2;GPATCH1;WDR88;CTD-2540B15.10;LRP3;	4	0	0	4	0	0	0	0	0	0	1	0	1	1	1	0	0	0	0	0
15	1	28472.6	29361.3	888.69	34.3414	HERC2;RP11-578F21.3;HERC2P9;RP11-578F21.2;GOLGA8M;RP11-578F21.6;WHAMMP2;APBA2;	4	0	0	4	0	0	0	0	0	0	1	0	1	1	1	0	0	0	0	0
21	3	36527.1	36640.8	113.675	32.1823	RUNX1;	4	0	0	4	0	0	0	0	0	0	1	0	1	1	1	0	0	0	0	0
15	6	48314.5	48629.9	315.357	30.0449	RP11-208K4.1;SLC12A1;RP11-154J22.1;DUT;	4	0	0	4	0	0	0	0	0	0	1	0	1	1	1	0	0	0	0	0
17	6	63141.8	63394.2	252.399	30.0225	RGS9;	4	0	0	4	0	0	0	0	0	0	1	0	1	1	1	0	0	0	0	0
2	13	122390	122461	70.127	30.0098	CLASP1;NIFK-AS1;RPL12P15;	4	0	0	4	0	0	0	0	0	0	1	0	1	1	1	0	0	0	0	0
5	9	109628	109797	168.412	29.0799	TMEM232;	4	1	0	4	1	0	0	0	0	0	1	0	1	1	1	1	0	0	0	0
12	0	19285.6	19517.5	231.819	28.0731	PLEKHA5;	4	0	0	4	0	0	0	0	0	0	1	0	1	1	1	0	0	0	0	0
4	3	34228.8	34391	162.174	27.1	RP11-548L20.1;	4	1	1	4	0	0	1	0	0	0	1	0	1	1	1	0	0	0	0	0
4	12	81351	82113.2	762.156	27.0141	C4orf22;PRKG2;	4	2	0	4	2	0	0	0	0	0	1	0	1	1	1	1	0	0	0	1
2	23	175941	176322	381.095	26.9371	ATF2;ATP5G3;AC096649.3;	3	3	3	3	0	0	0	1	1	1	1	0	1	1	0	0	0	0	0	0
8	14	129309	129482	173.169	26.5942	LINC00824;	2	0	0	2	0	0	0	0	0	0	1	0	0	0	1	0	0	0	0	0
18	3	30624.6	30944	319.381	26.4315	CCDC178;	0	1	1	0	0	0	1	0	0	0	0	0	0	0	0	0	0	0	0	0
17	1	15383.8	15554.3	170.509	26.09	TVP23C-CDRT4;RP11-385D13.1;	4	0	0	4	0	0	0	0	0	0	1	0	1	1	1	0	0	0	0	0
12	14	82730.8	82839.7	108.879	25.5546	CCDC59;METTL25;	1	1	1	1	0	0	0	1	0	0	0	0	0	1	0	0	0	0	0	0
10	12	112647	112747	99.54	25.3118	PDCD4;BBIP1;SHOC2;	4	1	0	4	1	0	0	0	0	0	1	0	1	1	1	1	0	0	0	0
5	8	108080	108204	124.341	25.3021	FER;	0	5	0	0	5	0	0	0	0	0	0	0	0	0	0	1	1	1	1	1
7	15	120042	120164	122.334	25.0494	KCND2;	4	0	0	4	0	0	0	0	0	0	1	0	1	1	1	0	0	0	0	0
10	10	98646.7	98750	103.308	25.0066	LCOR;	4	0	0	4	0	0	0	0	0	0	1	0	1	1	1	0	0	0	0	0
20	4	34432.7	34571.8	139.176	24.9267	PHF20;SCAND1;CNBD2;	4	10	5	4	5	1	1	1	1	1	1	0	1	1	1	1	1	1	1	1
8	12	117636	118170	534.146	24.9236	EIF3H;UTP23;RP11-654G14.1;SLC30A8;	4	0	0	4	0	0	0	0	0	0	1	0	1	1	1	0	0	0	0	0
4	1	25206.3	25342.6	136.259	24.8525	PI4K2B;RP11-660M5.1;ZCCHC4;	3	0	0	3	0	0	0	0	0	0	1	0	1	1	0	0	0	0	0	0
15	3	43638	43817.4	179.421	24.4413	ADAL;ZSCAN29;TUBGCP4;TP53BP1;MAP1A;	1	0	0	1	0	0	0	0	0	0	0	0	1	0	0	0	0	0	0	0
4	21	157673	158635	962.09	24.3958	PDGFC;GLRB;RP11-392C20.1;	4	5	3	4	2	0	1	0	1	1	1	0	1	1	1	0	0	1	1	0
10	2	32844.8	33136	291.156	24.2073	CCDC7;AL356053.1;	1	7	2	1	5	0	1	0	1	0	0	0	1	0	0	1	1	1	1	1
6	17	144798	145163	364.692	24.0852	UTRN;	4	0	0	4	0	0	0	0	0	0	1	0	1	1	1	0	0	0	0	0
6	2	27938.2	29710.8	1772.6	23.8635	OR2W4P;U3;IQCB2P;OR2B8P;OR1F12;ZNF165;ZSCAN12P1;ZNF602P;ZSCAN16-AS1;ZKSCAN8;ZNF192P1;ZNF603P;ZNF192P2;TOB2P1;ZSCAN9;ZKSCAN4;NKAPL;ZSCAN26;PGBD1;RP5-874C20.6;ZSCAN31;ZKSCAN3;RNU2-45P;COX11P1;OR2E1P;GPX5;ZBED9;RP5-1186N24.3;RP11-373N24.2;LINC00533;RPSAP2;NOP56P1;LINC01623;ZNF90P2;HCG14;TRIM27;LINC01556;KRT18P1;RN7SL471P;HCG15;HCG16;ZNF311;OR2AD1P;OR2J2;OR2J4P;OR2H4P;XXbac-BPG308J9.3;OR2U2P;OR2B4P;O…	4	4	0	4	4	0	0	0	0	0	1	0	1	1	1	1	1	0	1	1
2	7	90112.7	90260.2	147.446	23.8599	IGKV1D-17;IGKV1D-16;IGKV3D-11;IGKV2D-10;IGKV1D-42;IGKV1D-8;	1	0	0	1	0	0	0	0	0	0	0	0	0	1	0	0	0	0	0	0
6	19	151804	151899	95.638	23.7737	CCDC170;	4	1	1	4	0	0	0	1	0	0	1	0	1	1	1	0	0	0	0	0
18	0	7564.3	7695.09	130.794	23.7247	PTPRM;	4	0	0	4	0	0	0	0	0	0	1	0	1	1	1	0	0	0	0	0
3	6	129129	129253	124.357	23.661	EFCAB12;MBD4;IFT122;RHO;	4	0	0	4	0	0	0	0	0	0	1	0	1	1	1	0	0	0	0	0
14	1	39451.7	39573.4	121.73	23.5698	Y_RNA;SEC23A;	3	1	1	3	0	1	0	0	0	0	1	0	1	1	0	0	0	0	0	0
1	15	198137	198780	642.907	23.3189	NEK7;MIR181A1HG;	4	1	0	4	1	0	0	0	0	0	1	0	1	1	1	0	0	0	0	1
7	9	84008.5	84126.1	117.613	23.1991	SEMA3A;	0	1	0	0	1	0	0	0	0	0	0	0	0	0	0	0	0	0	1	0
7	6	72049.3	72175.5	126.246	22.9849	MIR4650-2;	4	0	0	4	0	0	0	0	0	0	1	0	1	1	1	0	0	0	0	0
2	5	83234.4	83331.4	97.04	22.9319		4	0	0	4	0	0	0	0	0	0	1	0	1	1	1	0	0	0	0	0
1	7	80317.9	80448.2	130.247	22.922		4	0	0	4	0	0	0	0	0	0	1	0	1	1	1	0	0	0	0	0
13	4	68310.9	68403.5	92.63	22.8698	BCRP9;NPM1P22;	3	3	1	3	2	1	0	0	0	0	1	0	0	1	1	0	1	1	0	0
9	10	135167	135269	101.694	22.8476	SETX;TTF1;	1	0	0	1	0	0	0	0	0	0	0	0	1	0	0	0	0	0	0	0
19	5	40476.6	40598.8	122.165	22.7474	PSMC4;ZNF546;ZNF780B;ZNF780A;	4	0	0	4	0	0	0	0	0	0	1	0	1	1	1	0	0	0	0	0
7	11	102837	102909	72.81	22.6526	DPY19L2P2;S100A11P1;	4	0	0	4	0	0	0	0	0	0	1	0	1	1	1	0	0	0	0	0
11	4	71629.1	71721.4	92.273	22.5734	RP11-849H4.2;RNF121;IL18BP;NUMA1;	3	0	0	3	0	0	0	0	0	0	1	0	1	0	1	0	0	0	0	0
1	1	6373.7	6445.26	71.561	22.5548	ACOT7;	3	1	0	3	1	0	0	0	0	0	1	0	0	1	1	1	0	0	0	0
9	0	12604.4	12604.4	0	22.4689		1	0	0	1	0	0	0	0	0	0	0	0	1	0	0	0	0	0	0	0
2	6	89180	89508	327.998	22.3309	IGKV4-1;IGKV5-2;IGKV7-3;PGBD4P5;IGKV2-4;IGKV1-5;IGKV3-20;IGKV6-21;IGKV1-22;IGKV2-24;IGKV3-25;IGKV1-27;	0	0	0	0	0	0	0	0	0	0	0	0	0	0	0	0	0	0	0	0
7	18	143816	143896	80.317	22.1161	OR2A15P;OR2A14;OR2A13P;ARHGEF35;	4	1	0	4	1	0	0	0	0	0	1	0	1	1	1	0	0	0	0	1
15	7	49544.9	49906.4	361.473	22.0146	GALK2;FAM227B;	4	3	2	4	1	0	1	0	0	1	1	0	1	1	1	0	0	0	1	0
12	5	47327.8	47429	101.177	21.9993		1	0	0	1	0	0	0	0	0	0	0	0	1	0	0	0	0	0	0	0
4	4	38758.6	38898.5	139.847	21.9365	RNA5SP158;TLR10;TLR6;FAM114A1;	4	0	0	4	0	0	0	0	0	0	1	0	1	1	1	0	0	0	0	0
2	3	50564.5	50682.9	118.449	21.8977	NRXN1;	1	0	0	1	0	0	0	0	0	0	0	0	0	0	1	0	0	0	0	0
11	0	41613.3	41901.3	287.936	21.8366	RP11-124G5.3;LINC01499;RP11-375D13.4;RP11-375D13.3;	3	0	0	3	0	0	0	0	0	0	1	0	1	0	1	0	0	0	0	0
20	3	22376.1	22405.2	29.103	21.7973	RP5-1004I9.1;	0	0	0	0	0	0	0	0	0	0	0	0	0	0	0	0	0	0	0	0
3	2	64262.5	64358.7	96.269	21.6972	PRICKLE2;	4	0	0	4	0	0	0	0	0	0	1	0	1	1	1	0	0	0	0	0
10	7	74780.9	75344.8	563.843	21.683	P4HA1;NUDT13;ECD;FAM149B1;DNAJC9;CFAP70;PPP3CB;USP54;	3	1	1	3	0	0	1	0	0	0	0	0	1	1	1	0	0	0	0	0
5	10	115622	115821	198.97	21.6186	COMMD10;CTC-339F2.2;SEMA6A;	4	0	0	4	0	0	0	0	0	0	1	0	1	1	1	0	0	0	0	0
17	7	75871.2	75959.8	88.588	21.5433	FLJ45079;RNU1-80P;	2	0	0	2	0	0	0	0	0	0	1	0	1	0	0	0	0	0	0	0
14	8	100490	100587	97.184	21.4076	EVL;CTD-2376I20.1;	4	0	0	4	0	0	0	0	0	0	1	0	1	1	1	0	0	0	0	0
4	15	91217.9	91319	101.114	21.339	CCSER1;	3	0	0	3	0	0	0	0	0	0	0	0	1	1	1	0	0	0	0	0
5	12	142089	142271	181.34	21.3308	AC005592.1;ARHGAP26;	4	0	0	4	0	0	0	0	0	0	1	0	1	1	1	0	0	0	0	0
14	6	76067.3	76162.3	94.972	21.2759	FLVCR2;TTLL5;	1	0	0	1	0	0	0	0	0	0	0	0	1	0	0	0	0	0	0	0
10	8	76678.6	76771.2	92.599	21.2565	KAT6B;	3	0	0	3	0	0	0	0	0	0	1	0	1	1	0	0	0	0	0	0
15	8	52478.2	52922.2	444.045	21.1895	GNB5;MYO5C;MYO5A;ARPP19;FAM214A;	4	0	0	4	0	0	0	0	0	0	1	0	1	1	1	0	0	0	0	0
4	6	41456.9	42033.6	576.644	21.1497	LIMCH1;RP11-457P14.6;TMEM33;DCAF4L1;SLC30A9;	4	5	1	4	4	0	1	0	0	0	1	0	1	1	1	1	0	1	1	1
17	5	58149.7	58893.6	743.89	21.1389	HEATR6;WFDC21P;RP11-15E18.3;RP11-15E18.4;BCAS3;	4	4	0	4	4	0	0	0	0	0	1	0	1	1	1	1	1	1	0	1
4	13	84099.3	84193.4	94.042	21.0571	RP11-576N17.5;RP11-576N17.2;RP11-576N17.3;COQ2;	0	0	0	0	0	0	0	0	0	0	0	0	0	0	0	0	0	0	0	0
2	27	190562	190728	165.738	20.9595	ANKAR;OSGEPL1;ORMDL1;PMS1;	3	1	0	3	1	0	0	0	0	0	1	0	1	0	1	0	0	0	0	1
1	8	87415.8	87555.4	139.55	20.9356	HS2ST1;	1	0	0	1	0	0	0	0	0	0	0	0	0	0	1	0	0	0	0	0
10	11	111886	111983	96.971	20.933	ADD3;MXI1;	2	0	0	2	0	0	0	0	0	0	1	0	1	0	0	0	0	0	0	0
11	3	70998.9	71089.3	90.359	20.9223	FLJ42102;	3	0	0	3	0	0	0	0	0	0	1	0	1	1	0	0	0	0	0	0
2	28	197334	197402	67.207	20.9176	HECW2;	4	5	0	4	5	0	0	0	0	0	1	0	1	1	1	1	1	1	1	1
9	3	34232.4	34370	137.624	20.9176	UBAP1;KIF24;NUDT2;KIAA1161;	3	0	0	3	0	0	0	0	0	0	0	0	1	1	1	0	0	0	0	0
14	5	66681.9	67718.3	1036.44	20.8422	RP11-72M17.1;GPHN;FAM71D;MPP5;	4	0	0	4	0	0	0	0	0	0	1	0	1	1	1	0	0	0	0	0
15	11	74627.2	75207.6	580.426	20.7539	CCDC33;CYP11A1;SEMA7A;UBL7;UBL7-AS1;COX5A;	3	0	0	3	0	0	0	0	0	0	1	0	1	0	1	0	0	0	0	0
7	3	36827.9	37154.2	326.275	20.5837	NPM1P18;AC007349.7;ELMO1;	1	0	0	1	0	0	0	0	0	0	0	0	1	0	0	0	0	0	0	0
19	1	19467.9	19636.7	168.765	20.5767	MAU2;GATAD2A;TSSK6;CTC-260F20.3;	0	1	1	0	0	0	0	0	1	0	0	0	0	0	0	0	0	0	0	0
8	0	30028.6	30137.3	108.776	20.5655	DCTN6;RP11-51J9.6;HSPA8P11;CTD-2345M20.2;	4	0	0	4	0	0	0	0	0	0	1	0	1	1	1	0	0	0	0	0
4	14	87086.1	87186.8	100.723	20.4948	MAPK10;	1	1	0	1	1	0	0	0	0	0	1	0	0	0	0	0	0	0	0	1
6	20	170063	170166	103.099	20.4022	WDR27;C6orf120;PHF10;RP1-266L20.4;TCTE3;ERMARD;	1	0	0	1	0	0	0	0	0	0	0	0	1	0	0	0	0	0	0	0
6	14	105573	105981	408.338	20.3246	BVES;BVES-AS1;POPDC3;	4	3	0	4	3	0	0	0	0	0	1	0	1	1	1	1	0	1	0	1
17	3	19142.2	19239.4	97.206	20.1861	EPN2;	3	0	0	3	0	0	0	0	0	0	0	0	1	1	1	0	0	0	0	0
10	0	16474.7	16567.9	93.202	20.0443	PTER;C1QL3;	1	0	0	1	0	0	0	0	0	0	0	0	1	0	0	0	0	0	0	0
10	6	71753.7	71859.2	105.482	19.9326	RP11-262I2.2;H2AFY2;	1	0	0	1	0	0	0	0	0	0	0	0	1	0	0	0	0	0	0	0
1	9	95461.4	95500.1	38.716	19.9236	ALG14;	0	0	0	0	0	0	0	0	0	0	0	0	0	0	0	0	0	0	0	0
2	25	183798	183884	86.243	19.8109	NCKAP1;	1	1	1	1	0	1	0	0	0	0	0	0	1	0	0	0	0	0	0	0
7	12	104856	104953	97.595	19.7768	SRPK2;	1	1	0	1	1	0	0	0	0	0	0	0	1	0	0	0	0	0	1	0
3	9	160570	161092	522.157	19.7691	PPM1L;EEF1GP4;PSMC1P7;SPTSSB;	3	0	0	3	0	0	0	0	0	0	1	0	1	1	0	0	0	0	0	0
15	10	72707.1	72768.8	61.714	19.7633	RP11-1007O24.3;PHBP20;RP11-1007O24.2;ARIH1;	2	0	0	2	0	0	0	0	0	0	1	0	0	1	0	0	0	0	0	0
9	5	90895.7	90940.1	44.383	19.7167	RPSAP49;	4	0	0	4	0	0	0	0	0	0	1	0	1	1	1	0	0	0	0	0
4	24	171499	171741	241.375	19.6462	HSP90AA6P;RP11-213L8.1;	4	1	0	4	1	0	0	0	0	0	1	0	1	1	1	0	0	0	1	0
2	21	167854	167962	107.474	19.6403	XIRP2;	3	1	0	3	1	0	0	0	0	0	1	0	1	1	0	1	0	0	0	0
14	2	40862	40887.3	25.25	19.5975	RP11-662J14.2;	2	0	0	2	0	0	0	0	0	0	1	0	1	0	0	0	0	0	0	0
9	9	113123	113212	88.419	19.4669	SVEP1;	0	0	0	0	0	0	0	0	0	0	0	0	0	0	0	0	0	0	0	0
6	12	95652.4	95652.4	0	19.3622		0	0	0	0	0	0	0	0	0	0	0	0	0	0	0	0	0	0	0	0
3	1	10314.6	10780.8	466.215	19.3266	TATDN2;GHRL;SEC13;ATP2B2;	1	0	0	1	0	0	0	0	0	0	0	0	1	0	0	0	0	0	0	0
19	4	39789.1	39856.6	67.503	19.3061	IFNL1;LRFN1;CTC-246B18.8;GMFG;SAMD4B;	2	1	0	2	1	0	0	0	0	0	1	0	0	0	1	0	0	1	0	0
1	16	206169	206259	89.975	19.2985	RP11-38J22.2;RP11-38J22.3;AVPR1B;	4	0	0	4	0	0	0	0	0	0	1	0	1	1	1	0	0	0	0	0
2	31	232864	232928	63.92	19.2955	DIS3L2;	0	0	0	0	0	0	0	0	0	0	0	0	0	0	0	0	0	0	0	0
18	6	65327	65457.1	130.038	19.2912	RP11-638L3.1;RP11-28O3.2;RP11-638L3.4;	2	2	0	2	2	0	0	0	0	0	0	0	1	1	0	1	0	0	0	1
1	18	219194	219223	29.242	19.2157		4	0	0	4	0	0	0	0	0	0	1	0	1	1	1	0	0	0	0	0
5	6	82380.1	82486.8	106.617	19.1911	XRCC4;	4	2	0	4	2	0	0	0	0	0	1	0	1	1	1	0	1	0	1	0
3	5	111898	112303	405.644	19.1225	SLC9C1;OR7E100P;ATG3;SLC35A5;	3	0	0	3	0	0	0	0	0	0	1	0	1	1	0	0	0	0	0	0
12	3	42189.3	42331.2	141.945	19.1114	RP11-630C16.2;	4	1	0	4	1	0	0	0	0	0	1	0	1	1	1	0	0	0	0	1
2	10	112728	112826	98.574	19.0316	MERTK;TMEM87B;	1	0	0	1	0	0	0	0	0	0	0	0	1	0	0	0	0	0	0	0
12	16	109943	110038	94.835	19.0064	UBE3B;MMAB;MVK;	1	3	1	1	2	0	1	0	0	0	0	0	0	1	0	0	1	1	0	0
4	25	173595	173650	55.05	18.8721	GALNTL6;	2	0	0	2	0	0	0	0	0	0	0	0	1	1	0	0	0	0	0	0
5	2	43678.8	43973.5	294.756	18.8326	NNT;RP11-8L21.1;	2	5	5	2	0	1	1	1	1	1	0	0	0	1	1	0	0	0	0	0
10	9	84045.4	84159.1	113.701	18.7921	NRG3;	3	0	0	3	0	0	0	0	0	0	1	0	1	1	0	0	0	0	0	0
1	11	120017	120111	94.051	18.7423	HSD3BP1;GAPDHP58;HSD3B1;GAPDHP32;HSD3BP3;GAPDHP27;HSD3BP4;	0	0	0	0	0	0	0	0	0	0	0	0	0	0	0	0	0	0	0	0
2	4	72405	72652.5	247.476	18.682	EXOC6B;	4	1	1	4	0	0	1	0	0	0	1	0	1	1	1	0	0	0	0	0
4	17	106614	106699	85.071	18.6811	INTS12;GSTCD;	0	1	0	0	1	0	0	0	0	0	0	0	0	0	0	0	0	0	0	1
8	1	42517.1	42627.1	109.986	18.6576	CHRNB3;CHRNA6;	1	0	0	1	0	0	0	0	0	0	0	0	0	0	1	0	0	0	0	0
8	9	112391	112457	66.063	18.5809	RP11-1101K5.1;	0	1	0	0	1	0	0	0	0	0	0	0	0	0	0	0	0	0	1	0
9	1	17164.4	17315.7	151.237	18.5433	CNTLN;	0	0	0	0	0	0	0	0	0	0	0	0	0	0	0	0	0	0	0	0
12	10	66260.9	66295.6	34.646	18.4621	RP11-366L20.2;HMGA2;	2	0	0	2	0	0	0	0	0	0	0	0	1	0	1	0	0	0	0	0
6	13	99721.8	100095	373.141	18.3206	FAXC;Y_RNA;	0	0	0	0	0	0	0	0	0	0	0	0	0	0	0	0	0	0	0	0
20	5	45035	45127.2	92.207	18.3061	ELMO2;ZNF663P;RP5-981L23.2;ZNF840P;ZNF334;	0	0	0	0	0	0	0	0	0	0	0	0	0	0	0	0	0	0	0	0
12	17	112360	112701	341.023	18.3006	ADAM1B;TMEM116;ERP29;HECTD4;	4	2	0	4	2	0	0	0	0	0	1	0	1	1	1	1	1	0	0	0
5	11	117455	117547	91.541	18.2852	CTD-3179P9.1;	0	1	0	0	1	0	0	0	0	0	0	0	0	0	0	0	0	0	1	0
2	8	98461.8	98538.1	76.303	18.2661	TMEM131;	0	2	0	0	2	0	0	0	0	0	0	0	0	0	0	0	0	0	1	1
6	0	13244.5	13336.8	92.358	18.2504	PHACTR1;TBC1D7;	4	0	0	4	0	0	0	0	0	0	1	0	1	1	1	0	0	0	0	0
9	7	97652.2	97719.6	67.362	18.2373	C9orf3;	3	0	0	3	0	0	0	0	0	0	0	0	1	1	1	0	0	0	0	0
4	22	164411	164492	81.322	18.2282	TMA16;MARCH1;	0	0	0	0	0	0	0	0	0	0	0	0	0	0	0	0	0	0	0	0
12	6	48444.5	48498.4	53.952	18.1118	SENP1;	3	0	0	3	0	0	0	0	0	0	1	0	1	0	1	0	0	0	0	0
4	28	188784	188784	0	18.0725		0	0	0	0	0	0	0	0	0	0	0	0	0	0	0	0	0	0	0	0
10	4	68106.1	68332.3	226.189	18.0714	CTNNA3;	4	0	0	4	0	0	0	0	0	0	1	0	1	1	1	0	0	0	0	0
12	4	44748.4	44838.7	90.274	18.0701	TMEM117;	1	0	0	1	0	0	0	0	0	0	1	0	0	0	0	0	0	0	0	0
2	19	154881	154997	115.821	18.0606	GALNT13;	1	5	0	1	5	0	0	0	0	0	0	0	0	1	0	1	1	1	1	1
8	8	111776	111861	84.917	18.0586	KB-1299A7.2;NDUFB9P3;	2	0	0	2	0	0	0	0	0	0	1	0	0	1	0	0	0	0	0	0
2	30	219424	219810	386.24	18.0559	USP37;CNOT9;WNT6;WNT10A;LINC01494;AC097468.7;	4	5	0	4	5	0	0	0	0	0	1	0	1	1	1	1	1	1	1	1
5	0	4723.88	4767.42	43.541	18.0305	RP11-445O3.2;	4	0	0	4	0	0	0	0	0	0	1	0	1	1	1	0	0	0	0	0
5	7	96872.5	97262.1	389.641	17.9908	LINC01340;RP11-72K17.1;RP11-455B3.1;	4	1	1	4	0	0	1	0	0	0	1	0	1	1	1	0	0	0	0	0
8	13	122131	122201	70.138	17.9676	RP11-369K17.1;	2	0	0	2	0	0	0	0	0	0	0	0	1	0	1	0	0	0	0	0
6	10	73764	73853.6	89.617	17.946	KCNQ5;	1	0	0	1	0	0	0	0	0	0	0	0	1	0	0	0	0	0	0	0
6	6	39445.3	39590.8	145.507	17.9375	KIF6;	4	0	0	4	0	0	0	0	0	0	1	0	1	1	1	0	0	0	0	0
4	5	39829.8	39901.1	71.211	17.9038	PDS5A;	1	0	0	1	0	0	0	0	0	0	0	0	1	0	0	0	0	0	0	0
4	26	180068	180092	24.044	17.8912		0	0	0	0	0	0	0	0	0	0	0	0	0	0	0	0	0	0	0	0
12	1	25756.2	26204.1	447.901	17.8662	LMNTD1;RASSF8;	2	1	0	2	1	0	0	0	0	0	0	0	1	1	0	0	1	0	0	0
13	0	34318	34407.4	89.386	17.8634	RFC3;	4	0	0	4	0	0	0	0	0	0	1	0	1	1	1	0	0	0	0	0
15	4	45151.2	45225.4	74.154	17.7257	SORD2P;RNU1-119P;CTD-2014N11.1;RNU6-1108P;	4	0	0	4	0	0	0	0	0	0	1	0	1	1	1	0	0	0	0	0
22	2	29157.5	29228.1	70.643	17.6977	CCDC117;XBP1;CTA-292E10.6;CTA-292E10.8;CTA-292E10.7;	2	0	0	2	0	0	0	0	0	0	0	0	1	1	0	0	0	0	0	0
1	6	75426.5	75434.4	7.916	17.6865	RP11-93N20.1;	4	3	0	4	3	0	0	0	0	0	1	0	1	1	1	0	1	1	1	0
6	7	43579.7	44024.3	444.598	17.6451	GTPBP2;MAD2L1BP;RSPH9;MRPS18A;RP5-1120P11.1;	3	0	0	3	0	0	0	0	0	0	1	0	1	1	0	0	0	0	0	0
12	13	80672.1	80957.9	285.845	17.6132	OTOGL;PTPRQ;	1	0	0	1	0	0	0	0	0	0	1	0	0	0	0	0	0	0	0	0
1	17	212190	212279	89.14	17.5643	INTS7;DTL;	0	2	2	0	0	0	1	1	0	0	0	0	0	0	0	0	0	0	0	0
8	2	49186.4	49430.7	244.286	17.5393	CTD-2210A23.1;RNU6-295P;RP11-567J20.3;	0	3	3	0	0	0	1	1	0	1	0	0	0	0	0	0	0	0	0	0
8	11	115333	115819	486.754	17.5305	RP11-393K19.1;CARSP2;	4	0	0	4	0	0	0	0	0	0	1	0	1	1	1	0	0	0	0	0
3	4	110848	110882	34.083	17.4078	NECTIN3;	3	0	0	3	0	0	0	0	0	0	1	0	1	0	1	0	0	0	0	0
2	16	140265	140274	8.591	17.4013	SNORA72;	3	0	0	3	0	0	0	0	0	0	1	0	1	0	1	0	0	0	0	0
4	8	61210.9	61270.1	59.194	17.3281		4	1	0	4	1	0	0	0	0	0	1	0	1	1	1	0	0	0	1	0
1	0	1117.4	1364.35	246.951	17.2987	TTLL10;MXRA8;AURKAIP1;NDUFB4P8;CCNL2;MRPL20;ANKRD65;TMEM88B;	4	4	0	4	4	0	0	0	0	0	1	0	1	1	1	1	1	1	0	1
7	10	100958	101057	99.223	17.2939	IFT22;COL26A1;	2	0	0	2	0	0	0	0	0	0	1	0	1	0	0	0	0	0	0	0
16	0	14201.2	14278.1	76.933	17.1869	MKL2;	2	0	0	2	0	0	0	0	0	0	0	0	1	1	0	0	0	0	0	0
11	2	68708.7	68722.7	13.963	17.1755	IGHMBP2;RP11-757G1.5;	3	0	0	3	0	0	0	0	0	0	1	0	0	1	1	0	0	0	0	0
9	6	94227.9	94298.5	70.599	17.1584		4	0	0	4	0	0	0	0	0	0	1	0	1	1	1	0	0	0	0	0
11	7	103647	103725	77.927	17.0868	RP11-563P16.1;	0	0	0	0	0	0	0	0	0	0	0	0	0	0	0	0	0	0	0	0
2	0	8876.8	8946.75	69.948	17.077	KIDINS220;	0	0	0	0	0	0	0	0	0	0	0	0	0	0	0	0	0	0	0	0
6	18	150284	150287	3.342	17.0633	ULBP1;	1	0	0	1	0	0	0	0	0	0	0	0	1	0	0	0	0	0	0	0
3	10	165402	165637	234.502	17.0253	BCHE;	3	3	0	3	3	0	0	0	0	0	1	0	1	1	0	1	0	0	1	1
11	5	85701.2	85785	83.815	17.0086	PICALM;	1	2	2	1	0	0	1	1	0	0	0	0	1	0	0	0	0	0	0	0
18	1	11465.9	11533.6	67.745	17.0044	RP11-128P17.3;LINC01255;	1	0	0	1	0	0	0	0	0	0	0	0	1	0	0	0	0	0	0	0
13	3	47075.4	47141.6	66.117	16.9926	FKBP1AP3;LRCH1;	0	0	0	0	0	0	0	0	0	0	0	0	0	0	0	0	0	0	0	0
13	5	97711.4	97786.3	74.844	16.9773		0	0	0	0	0	0	0	0	0	0	0	0	0	0	0	0	0	0	0	0
12	7	50066.2	50152.2	85.949	16.9405	FMNL3;TMBIM6;	3	2	0	3	2	0	0	0	0	0	1	0	1	0	1	0	0	1	1	0
2	29	211764	211764	0	16.9313		0	0	0	0	0	0	0	0	0	0	0	0	0	0	0	0	0	0	0	0
2	17	141035	141114	78.511	16.9307	LRP1B;	0	3	2	0	1	0	1	0	1	0	0	0	0	0	0	0	0	0	1	0
20	0	5559.59	5590.06	30.467	16.9144	GPCPD1;	0	0	0	0	0	0	0	0	0	0	0	0	0	0	0	0	0	0	0	0
1	5	67777	67850.5	73.494	16.9024	IL12RB2;	0	0	0	0	0	0	0	0	0	0	0	0	0	0	0	0	0	0	0	0
1	4	53449.7	53538.7	88.97	16.8551	SCP2;PODN;	1	0	0	1	0	0	0	0	0	0	0	0	1	0	0	0	0	0	0	0
5	14	167186	167248	61.986	16.8121	TENM2;	4	0	0	4	0	0	0	0	0	0	1	0	1	1	1	0	0	0	0	0
21	1	30164.4	30195.3	30.826	16.8024		4	0	0	4	0	0	0	0	0	0	1	0	1	1	1	0	0	0	0	0
16	1	80727.8	80813.7	85.942	16.7874	CDYL2;	0	0	0	0	0	0	0	0	0	0	0	0	0	0	0	0	0	0	0	0
1	13	174297	174357	60.771	16.7639	RABGAP1L;	2	0	0	2	0	0	0	0	0	0	1	0	0	1	0	0	0	0	0	0
5	5	78719	78780.6	61.534	16.7562	HOMER1;	2	0	0	2	0	0	0	0	0	0	0	0	1	1	0	0	0	0	0	0
5	1	24090.2	24181.8	91.522	16.7232	C5orf17;CTD-2015B23.2;	3	0	0	3	0	0	0	0	0	0	0	0	1	1	1	0	0	0	0	0
7	4	40708.2	40766.6	58.382	16.7066	SUGCT;	0	0	0	0	0	0	0	0	0	0	0	0	0	0	0	0	0	0	0	0
14	9	106816	106833	16.881	16.6804	IGHV3-33;IGHV3-33-2;IGHVII-33-1;IGHV4-34;	4	0	0	4	0	0	0	0	0	0	1	0	1	1	1	0	0	0	0	0
18	5	61237.5	61276.4	38.907	16.6682	SERPINB12;SERPINB13;	0	0	0	0	0	0	0	0	0	0	0	0	0	0	0	0	0	0	0	0
2	26	189896	189971	75.707	16.6497	COL5A2;	3	4	0	3	4	0	0	0	0	0	1	0	1	0	1	1	1	1	1	0
6	1	24230.2	24285.6	55.357	16.634	DCDC2;	2	0	0	2	0	0	0	0	0	0	0	0	1	0	1	0	0	0	0	0
13	2	44141.3	44445.5	304.213	16.6238	ENOX1;CCDC122;	3	0	0	3	0	0	0	0	0	0	1	0	1	1	0	0	0	0	0	0
11	6	88308.2	88385.1	76.923	16.597	GRM5;	4	2	0	4	2	0	0	0	0	0	1	0	1	1	1	1	0	0	0	1
6	3	32590	33152.9	562.913	16.585	HLA-DQA1;HLA-DQB1;HLA-DPB2;HLA-DPA3;HCG24;COL11A2;	1	5	5	1	0	1	1	1	1	1	1	0	0	0	0	0	0	0	0	0
17	4	53818.1	53910.9	92.752	16.5471	PCTP;	2	0	0	2	0	0	0	0	0	0	0	0	0	1	1	0	0	0	0	0
21	2	33759.6	33814.4	54.787	16.5459	URB1;URB1-AS1;EVA1C;	0	0	0	0	0	0	0	0	0	0	0	0	0	0	0	0	0	0	0	0
3	7	130106	130208	101.383	16.5382	COL6A5;	4	1	0	4	1	0	0	0	0	0	1	0	1	1	1	0	1	0	0	0
1	19	227259	227461	201.871	16.529	CDC42BPA;	0	2	0	0	2	0	0	0	0	0	0	0	0	0	0	0	1	0	1	0
2	32	238390	238961	571.517	16.5183	MLPH;UBE2F;UBE2F-SCLY;	4	0	0	4	0	0	0	0	0	0	1	0	1	1	1	0	0	0	0	0
2	20	158685	158695	9.481	16.4434	ACVR1;	4	0	0	4	0	0	0	0	0	0	1	0	1	1	1	0	0	0	0	0
4	19	124126	124225	99.319	16.438	SPATA5;	3	2	0	3	2	0	0	0	0	0	1	0	1	1	0	0	1	1	0	0
8	6	105211	105273	62.067	16.4271	RIMS2;	0	0	0	0	0	0	0	0	0	0	0	0	0	0	0	0	0	0	0	0
1	10	100456	100486	29.976	16.426	SLC35A3;	0	0	0	0	0	0	0	0	0	0	0	0	0	0	0	0	0	0	0	0
8	15	139988	139989	1.076	16.4222		1	0	0	1	0	0	0	0	0	0	0	0	0	0	1	0	0	0	0	0
1	14	179985	180044	58.78	16.4174	CEP350;	3	0	0	3	0	0	0	0	0	0	0	0	1	1	1	0	0	0	0	0
19	0	9776.64	9776.64	0	16.4027		0	0	0	0	0	0	0	0	0	0	0	0	0	0	0	0	0	0	0	0
2	2	45685.7	45735.2	49.493	16.34	SRBD1;	0	0	0	0	0	0	0	0	0	0	0	0	0	0	0	0	0	0	0	0
18	4	36866	36930.2	64.177	16.3324	RP11-244M2.1;RPL7AP66;	0	0	0	0	0	0	0	0	0	0	0	0	0	0	0	0	0	0	0	0
14	4	63715.6	63732.6	16.945	16.3249	RHOJ;	4	0	0	4	0	0	0	0	0	0	1	0	1	1	1	0	0	0	0	0
6	15	110429	110745	315.742	16.3054	WASF1;DDO;SLC22A16;	2	1	1	2	0	0	1	0	0	0	1	0	0	1	0	0	0	0	0	0
1	2	7833.23	7908.89	75.66	16.2542	VAMP3;PER3;UTS2;	0	0	0	0	0	0	0	0	0	0	0	0	0	0	0	0	0	0	0	0
4	18	121809	121840	31.431	16.2513	PRDM5;	0	0	0	0	0	0	0	0	0	0	0	0	0	0	0	0	0	0	0	0
8	10	114193	114320	126.838	16.2114	CSMD3;	2	2	2	2	0	0	1	0	1	0	1	0	1	0	0	0	0	0	0	0
22	1	28411.2	28463.7	52.478	16.204	TTC28;	1	0	0	1	0	0	0	0	0	0	1	0	0	0	0	0	0	0	0	0
7	0	4839.16	4903.57	64.411	16.1985	RADIL;PAPOLB;	1	0	0	1	0	0	0	0	0	0	0	0	0	1	0	0	0	0	0	0
14	3	61990.9	62180.5	189.624	16.1526	PRKCH;RP11-47I22.4;FLJ22447;HIF1A-AS1;	4	1	0	4	1	0	0	0	0	0	1	0	1	1	1	1	0	0	0	0
6	11	81207.2	81283.2	75.973	16.1339	RP11-11L12.2;RP11-486E2.1;	1	2	0	1	2	0	0	0	0	0	1	0	0	0	0	0	1	1	0	0
20	2	17555.4	17632.8	77.43	16.1039	DSTN;RRBP1;	2	0	0	2	0	0	0	0	0	0	1	0	1	0	0	0	0	0	0	0
4	9	67815.2	67901.6	86.35	16.0958		0	0	0	0	0	0	0	0	0	0	0	0	0	0	0	0	0	0	0	0
18	7	67742.4	67832.6	90.165	16.0486	RTTN;	2	0	0	2	0	0	0	0	0	0	1	0	1	0	0	0	0	0	0	0
15	9	69147.1	69193.3	46.155	16.0375	SPESP1;	4	0	0	4	0	0	0	0	0	0	1	0	1	1	1	0	0	0	0	0
18	2	20478.7	20551	72.287	16.0179	RP11-370A5.1;RP11-739L10.1;RBBP8;	1	0	0	1	0	0	0	0	0	0	0	0	0	0	1	0	0	0	0	0
1	3	35661.5	35802.9	141.44	15.9387	SFPQ;Y_RNA;ZMYM4;	3	0	0	3	0	0	0	0	0	0	1	0	1	1	0	0	0	0	0	0
4	23	169828	169866	37.757	15.8924	PALLD;CBR4;	0	0	0	0	0	0	0	0	0	0	0	0	0	0	0	0	0	0	0	0
17	0	3933.03	4001.39	68.364	15.8899	ZZEF1;	0	1	0	0	1	0	0	0	0	0	0	0	0	0	0	0	0	1	0	0
17	2	16987.3	17017.9	30.616	15.8795	MPRIP;	0	0	0	0	0	0	0	0	0	0	0	0	0	0	0	0	0	0	0	0
3	3	95880.7	95890.5	9.843	15.8766		1	0	0	1	0	0	0	0	0	0	0	0	0	1	0	0	0	0	0	0
10	14	135353	135372	19.801	15.8592	CYP2E1;SPRN;SYCE1;	3	0	0	3	0	0	0	0	0	0	0	0	1	1	1	0	0	0	0	0
7	13	114327	114363	35.89	15.7948	FOXP2;	0	0	0	0	0	0	0	0	0	0	0	0	0	0	0	0	0	0	0	0
8	3	69891.9	69911.6	19.736	15.7755	LINC01592;	0	0	0	0	0	0	0	0	0	0	0	0	0	0	0	0	0	0	0	0
4	20	131325	131346	21.806	15.7373		4	0	0	4	0	0	0	0	0	0	1	0	1	1	1	0	0	0	0	0
3	8	131587	131972	384.764	15.7204	CPNE4;	2	1	1	2	0	0	0	1	0	0	0	0	0	1	1	0	0	0	0	0
12	2	39885.2	39885.2	0	15.714		0	0	0	0	0	0	0	0	0	0	0	0	0	0	0	0	0	0	0	0
12	18	124061	124107	45.618	15.7087	RP11-486O12.2;TMED2;DDX55;EIF2B1;	0	3	0	0	3	0	0	0	0	0	0	0	0	0	0	1	0	1	1	0
2	24	178456	178519	62.743	15.6885	AC073834.3;TTC30A;PDE11A;	3	1	0	3	1	0	0	0	0	0	1	0	1	0	1	1	0	0	0	0
9	4	37856.8	37889.2	32.461	15.6808	DCAF10;RP11-613M10.9;PAICSP1;SLC25A51;	0	0	0	0	0	0	0	0	0	0	0	0	0	0	0	0	0	0	0	0
6	9	47455.2	47497.2	42.04	15.6512	CD2AP;	0	2	0	0	2	0	0	0	0	0	0	0	0	0	0	1	0	1	0	0
5	4	64901	64982.2	81.173	15.6482	TRIM23;CTC-534A2.2;TRAPPC13;SGTB;	4	5	0	4	5	0	0	0	0	0	1	0	1	1	1	1	1	1	1	1
8	7	108446	108493	47.633	15.6194	ANGPT1;	0	0	0	0	0	0	0	0	0	0	0	0	0	0	0	0	0	0	0	0
7	17	139405	139407	2.335	15.5461	HIPK2;	0	0	0	0	0	0	0	0	0	0	0	0	0	0	0	0	0	0	0	0
6	5	37820.5	37869.7	49.181	15.5409	ZFAND3;	3	0	0	3	0	0	0	0	0	0	1	0	1	1	0	0	0	0	0	0
4	16	104601	104629	28.005	15.5399	TACR3;	0	0	0	0	0	0	0	0	0	0	0	0	0	0	0	0	0	0	0	0
4	2	29206.5	29226.9	20.416	15.4886	RP11-472K22.1;RP11-472K22.2;	0	1	0	0	1	0	0	0	0	0	0	0	0	0	0	0	0	0	0	1
5	3	49683.7	49716	32.348	15.4785	EMB;	0	0	0	0	0	0	0	0	0	0	0	0	0	0	0	0	0	0	0	0
2	9	100076	100110	34.109	15.4656	REV1;	0	0	0	0	0	0	0	0	0	0	0	0	0	0	0	0	0	0	0	0
10	13	132120	132151	30.962	15.4654		0	0	0	0	0	0	0	0	0	0	0	0	0	0	0	0	0	0	0	0
2	22	168566	168613	46.904	15.4248	CTAGE14P;	1	0	0	1	0	0	0	0	0	0	0	0	1	0	0	0	0	0	0	0
10	1	23105.2	23110.8	5.622	15.3349		0	0	0	0	0	0	0	0	0	0	0	0	0	0	0	0	0	0	0	0
4	0	22518.8	22595.9	77.105	15.322	ADGRA3;RP11-10G12.1;	0	0	0	0	0	0	0	0	0	0	0	0	0	0	0	0	0	0	0	0
8	16	143425	143447	21.971	15.2892	TSNARE1;	0	0	0	0	0	0	0	0	0	0	0	0	0	0	0	0	0	0	0	0
9	8	111710	111737	27.601	15.2887	CTNNAL1;	0	2	0	0	2	0	0	0	0	0	0	0	0	0	0	0	1	0	0	1
7	16	129349	129357	8.197	15.2669	NRF1;	3	0	0	3	0	0	0	0	0	0	1	0	0	1	1	0	0	0	0	0
14	7	88449.5	88472.7	23.213	15.2662	GALC;RNU6-835P;GPR65;	0	0	0	0	0	0	0	0	0	0	0	0	0	0	0	0	0	0	0	0
12	9	55506.5	55509.4	2.955	15.2569	OR9K1P;	3	0	0	3	0	0	0	0	0	0	1	0	0	1	1	0	0	0	0	0
4	11	75168.8	75210.1	41.289	15.2552	EPGN;	0	0	0	0	0	0	0	0	0	0	0	0	0	0	0	0	0	0	0	0
11	9	120099	120164	64.909	15.2405	OAF;POU2F3;	0	0	0	0	0	0	0	0	0	0	0	0	0	0	0	0	0	0	0	0
15	13	93197.4	93205.1	7.653	15.2393	FAM174B;	0	0	0	0	0	0	0	0	0	0	0	0	0	0	0	0	0	0	0	0
2	12	119371	119371	0	15.2359		0	0	0	0	0	0	0	0	0	0	0	0	0	0	0	0	0	0	0	0
11	8	106045	106110	65.01	15.1978		0	0	0	0	0	0	0	0	0	0	0	0	0	0	0	0	0	0	0	0
2	1	13724.1	13726.7	2.521	15.1929	AC092635.1;	4	0	0	4	0	0	0	0	0	0	1	0	1	1	1	0	0	0	0	0
15	12	86213.2	86251.6	38.418	15.1882	AKAP13;	1	0	0	1	0	0	0	0	0	0	0	0	0	1	0	0	0	0	0	0
7	2	33635	33649.9	14.902	15.1556	BBS9;	0	0	0	0	0	0	0	0	0	0	0	0	0	0	0	0	0	0	0	0
10	5	69827	69848.3	21.286	15.0957	HERC4;	3	2	2	3	0	1	0	0	0	1	1	0	1	0	1	0	0	0	0	0
6	8	46905	46940.4	35.431	15.0732	ADGRF5;	0	0	0	0	0	0	0	0	0	0	0	0	0	0	0	0	0	0	0	0
7	8	82931.2	82931.2	0	15.0674		0	0	0	0	0	0	0	0	0	0	0	0	0	0	0	0	0	0	0	0
3	11	182050	182078	28.95	15.0614	RP11-338L18.1;	0	0	0	0	0	0	0	0	0	0	0	0	0	0	0	0	0	0	0	0
9	2	20366.1	20366.1	0	15.0582		0	0	0	0	0	0	0	0	0	0	0	0	0	0	0	0	0	0	0	0
7	7	74517.6	74517.6	0	15.0501		0	5	0	0	5	0	0	0	0	0	0	0	0	0	0	1	1	1	1	1
2	14	128129	128154	24.98	15.037	MAP3K2;AC068282.3;	0	0	0	0	0	0	0	0	0	0	0	0	0	0	0	0	0	0	0	0
11	10	129996	129998	2.281	15.0281	APLP2;	3	0	0	3	0	0	0	0	0	0	1	0	0	1	1	0	0	0	0	0
5	13	145039	145044	5.551	15.023	PRELID2;	3	0	0	3	0	0	0	0	0	0	1	0	0	1	1	0	0	0	0	0
2	11	113649	113649	0	15.0101		0	0	0	0	0	0	0	0	0	0	0	0	0	0	0	0	0	0	0	0
12	15	88967	88967.9	0.85	15.01	KITLG;	2	1	0	2	1	0	0	0	0	0	0	0	0	1	1	0	0	1	0	0
8	5	104640	104690	50.494	15.0063	RIMS2;	0	3	0	0	3	0	0	0	0	0	0	0	0	0	0	0	1	1	0	1
12	12	70654.3	70673.7	19.416	14.9946	CNOT2;	3	0	0	3	0	0	0	0	0	0	1	0	1	0	1	0	0	0	0	0
15	0	27561.8	27563.6	1.841	14.9779	GABRG3;	1	0	0	1	0	0	0	0	0	0	0	0	1	0	0	0	0	0	0	0
14	0	26935.3	26973	37.705	14.9608	NOVA1;	0	0	0	0	0	0	0	0	0	0	0	0	0	0	0	0	0	0	0	0
13	1	41298.2	41319.5	21.347	14.9482	MRPS31;	0	0	0	0	0	0	0	0	0	0	0	0	0	0	0	0	0	0	0	0
2	18	153024	153037	13.185	14.937	STAM2;	4	1	0	4	1	0	0	0	0	0	1	0	1	1	1	0	0	0	1	0
7	14	119514	119540	26.54	14.8916	RP11-328J2.1;	0	0	0	0	0	0	0	0	0	0	0	0	0	0	0	0	0	0	0	0
12	8	51410.7	51412	1.29	14.8495	SLC11A2;	1	0	0	1	0	0	0	0	0	0	0	0	1	0	0	0	0	0	0	0
19	2	22772.9	22795.7	22.717	14.8215	GOLGA2P9;CTC-457E21.6;CTC-457E21.5;CTC-457E21.4;AC011516.2;	2	0	0	2	0	0	0	0	0	0	0	0	1	1	0	0	0	0	0	0
21	0	20293.6	20297.2	3.588	14.8113	AL157359.4;	0	0	0	0	0	0	0	0	0	0	0	0	0	0	0	0	0	0	0	0
15	5	47568.7	47586.7	17.959	14.787	RP11-408J6.1;SEMA6D;	0	0	0	0	0	0	0	0	0	0	0	0	0	0	0	0	0	0	0	0
4	10	73018	73018	0	14.7694		2	0	0	2	0	0	0	0	0	0	1	0	1	0	0	0	0	0	0	0
6	4	34711.9	34736.6	24.607	14.7659	RP3-375P9.2;SNRPC;	3	0	0	3	0	0	0	0	0	0	1	0	1	0	1	0	0	0	0	0
15	2	34859.9	34866.7	6.758	14.7501	GOLGA8B;	0	0	0	0	0	0	0	0	0	0	0	0	0	0	0	0	0	0	0	0
11	1	44242.6	44245.2	2.63	14.7412	EXT2;	0	1	0	0	1	0	0	0	0	0	0	0	0	0	0	0	0	0	1	0
4	27	186321	186324	2.714	14.7113	UFSP2;	0	0	0	0	0	0	0	0	0	0	0	0	0	0	0	0	0	0	0	0
7	5	52554.2	52568.8	14.58	14.7058		0	0	0	0	0	0	0	0	0	0	0	0	0	0	0	0	0	0	0	0
10	3	44539.6	44541.6	1.986	14.6913		1	0	0	1	0	0	0	0	0	0	0	0	0	1	0	0	0	0	0	0
4	7	56348.2	56359.7	11.481	14.6602	CLOCK;	3	3	0	3	3	0	0	0	0	0	0	0	1	1	1	1	0	0	1	1
22	0	19083.7	19083.7	0	14.6051		0	0	0	0	0	0	0	0	0	0	0	0	0	0	0	0	0	0	0	0
12	11	69875.4	69879.2	3.857	14.6022	FRS2;	0	0	0	0	0	0	0	0	0	0	0	0	0	0	0	0	0	0	0	0
20	1	8008.13	8013.5	5.376	14.6001	RP5-971N18.3;	3	0	0	3	0	0	0	0	0	0	1	0	1	1	0	0	0	0	0	0
7	1	24577.2	24577.2	0	14.5993		4	0	0	4	0	0	0	0	0	0	1	0	1	1	1	0	0	0	0	0
1	12	152933	152933	0	14.5967		0	0	0	0	0	0	0	0	0	0	0	0	0	0	0	0	0	0	0	0
8	4	89667.1	89668.9	1.801	14.5835	RP11-586K2.1;	3	0	0	3	0	0	0	0	0	0	1	0	1	1	0	0	0	0	0	0
7	19	155590	155590	0.097	14.5653	SHH;	1	0	0	1	0	0	0	0	0	0	1	0	0	0	0	0	0	0	0	0
3	0	1046.04	1046.08	0.045	14.5385	AC087430.1;	2	0	0	2	0	0	0	0	0	0	1	0	1	0	0	0	0	0	0	0
6	16	112240	112242	1.921	14.5347		0	0	0	0	0	0	0	0	0	0	0	0	0	0	0	0	0	0	0	0

[truncated: 8 more sheets: EUR-GBR, EUR-IBS, EUR-TSI, ASI-CDX, ASI-CHB, ASI-CHS, ASI-JPT, ASI-KHV]
